# Supplementary material for: On the Inability to Ignore Useless Advice
Source: Atypon-hosted journal article supplement (doi:10.1027/1618-3169/a000361), 2017-05-01
Supplement: 1618-3169_a000361_esm1.csv [file 1618-3169_a000361_esm1.csv]

VP	gender	age	trial	IE	AD	FE	DEV	condition
1	W	20	1	0	3600	400	-34	completely incompetent
2	W	21	1	2000	1310	1500	-34	completely incompetent
3	M	22	1	800	520	850	-34	completely incompetent
4	M	26	1	600	390	400	-34	completely incompetent
5	W	21	1	1000	650	1000	-34	completely incompetent
6	M	22	1	200	130	200	-34	completely incompetent
7	M	22	1	400	260	400	-34	completely incompetent
8	M	31	1	800	520	670	-34	completely incompetent
9	W	21	1	150	1600	150	-34	completely incompetent
10	M	28	1	300	190	250	-34	completely incompetent
11	M	23	1	300	190	320	-34	completely incompetent
12	W	21	1	240	150	190	-34	completely incompetent
13	M	21	1	1000	650	1000	-34	completely incompetent
14	M	21	1	900	590	800	-34	completely incompetent
15	W	23	1	800	520	600	-34	completely incompetent
16	M	21	1	1610	1060	1610	-34	completely incompetent
17	W	20	1	800	520	800	-34	completely incompetent
18	M	25	1	500	320	500	-34	completely incompetent
19	W	22	1	1000	650	1000	-34	completely incompetent
20	W	19	1	2000	1310	2000	-34	completely incompetent
21	W	23	1	800	520	800	-34	completely incompetent
22	M	21	1	780	510	780	-34	completely incompetent
23	W	21	1	800	520	800	-34	completely incompetent
24	W	18	1	300	190	310	-34	completely incompetent
25	W	20	1	700	460	600	-34	completely incompetent
26	M	20	1	1400	920	140	-34	completely incompetent
27	M	21	1	1000	650	1000	-34	completely incompetent
28	W	20	1	900	590	1100	-34	completely incompetent
1	W	20	2	1000	760	1050	-24	completely incompetent
2	W	21	2	1200	910	500	-24	completely incompetent
3	M	22	2	1700	1290	1700	-24	completely incompetent
4	M	26	2	90	600	800	-24	completely incompetent
5	W	21	2	1500	1140	2000	-24	completely incompetent
6	M	22	2	9	4000	900	-24	completely incompetent
7	M	22	2	620	470	0	-24	completely incompetent
8	M	31	2	2900	2200	2700	-24	completely incompetent
9	W	21	2	350	260	300	-24	completely incompetent
10	M	28	2	600	450	600	-24	completely incompetent
11	M	23	2	500	380	520	-24	completely incompetent
12	W	21	2	210	150	210	-24	completely incompetent
13	M	21	2	3200	2430	3200	-24	completely incompetent
14	M	21	2	2400	1820	2400	-24	completely incompetent
15	W	23	2	900	680	900	-24	completely incompetent
16	M	21	2	0	3100	2619	-24	completely incompetent
17	W	20	2	1400	1060	1400	-24	completely incompetent
18	M	25	2	1000	760	1000	-24	completely incompetent
19	W	22	2	800	600	900	-24	completely incompetent
20	W	19	2	3500	2660	0	-24	completely incompetent
21	W	23	2	700	530	790	-24	completely incompetent
22	M	21	2	1450	1100	1450	-24	completely incompetent
23	W	21	2	1500	1140	1400	-24	completely incompetent
24	W	18	2	600	450	610	-24	completely incompetent
25	W	20	2	1300	980	1200	-24	completely incompetent
26	M	20	2	1200	910	0	-24	completely incompetent
27	M	21	2	1010	760	1000	-24	completely incompetent
28	W	20	2	2100	1590	2300	-24	completely incompetent
1	W	20	3	8	1400	800	22	somewhat competent
2	W	21	3	400	480	480	22	somewhat competent
3	M	22	3	600	730	900	22	somewhat competent
4	M	26	3	700	850	700	22	somewhat competent
5	W	21	3	800	970	800	22	somewhat competent
6	M	22	3	650	790	650	22	somewhat competent
7	M	22	3	300	360	380	22	somewhat competent
8	M	31	3	1300	1580	1400	22	somewhat competent
9	W	21	3	350	420	350	22	somewhat competent
10	M	28	3	560	680	560	22	somewhat competent
11	M	23	3	0	2000	1200	22	somewhat competent
12	W	21	3	310	370	333	22	somewhat competent
13	M	21	3	1500	1830	1500	22	somewhat competent
14	M	21	3	1100	1340	1100	22	somewhat competent
15	W	23	3	750	910	800	22	somewhat competent
16	M	21	3	2591	3160	259	22	somewhat competent
17	W	20	3	2000	2440	2000	22	somewhat competent
18	M	25	3	700	850	700	22	somewhat competent
19	W	22	3	1000	1220	1500	22	somewhat competent
20	W	19	3	2300	2800	2500	22	somewhat competent
21	W	23	3	1300	1580	1300	22	somewhat competent
22	M	21	3	980	1190	980	22	somewhat competent
23	W	21	3	1800	2190	1800	22	somewhat competent
24	W	18	3	1050	1280	1300	22	somewhat competent
25	W	20	3	1000	1220	1000	22	somewhat competent
26	M	20	3	1500	1830	1600	22	somewhat competent
27	M	21	3	0	3500	2500	22	somewhat competent
28	W	20	3	1650	2010	1750	22	somewhat competent
1	W	20	4	900	1400	1000	NA	no advice
2	W	21	4	450	480	500	NA	no advice
3	M	22	4	900	730	900	NA	no advice
4	M	26	4	800	850	800	NA	no advice
5	W	21	4	2900	970	2000	NA	no advice
6	M	22	4	700	790	700	NA	no advice
7	M	22	4	356	360	356	NA	no advice
8	M	31	4	1400	1580	1500	NA	no advice
9	W	21	4	400	420	350	NA	no advice
10	M	28	4	620	680	70	NA	no advice
11	M	23	4	1000	2000	1000	NA	no advice
12	W	21	4	345	370	360	NA	no advice
13	M	21	4	2000	1830	2000	NA	no advice
14	M	21	4	1800	1340	1800	NA	no advice
15	W	23	4	900	910	900	NA	no advice
16	M	21	4	1101	3160	1111	NA	no advice
17	W	20	4	0	2440	0	NA	no advice
18	M	25	4	1000	850	1200	NA	no advice
19	W	22	4	800	1220	800	NA	no advice
20	W	19	4	3750	2800	3750	NA	no advice
21	W	23	4	900	1580	900	NA	no advice
22	M	21	4	750	1190	750	NA	no advice
23	W	21	4	1700	2190	1700	NA	no advice
24	W	18	4	850	1280	850	NA	no advice
25	W	20	4	1200	1220	1200	NA	no advice
26	M	20	4	1300	1830	1400	NA	no advice
27	M	21	4	1500	3500	1500	NA	no advice
28	W	20	4	1200	2010	1500	NA	no advice
1	W	20	5	500	1400	400	NA	no advice
2	W	21	5	450	480	1000	NA	no advice
3	M	22	5	800	730	800	NA	no advice
4	M	26	5	500	850	500	NA	no advice
5	W	21	5	0	970	1200	NA	no advice
6	M	22	5	250	790	250	NA	no advice
7	M	22	5	200	360	200	NA	no advice
8	M	31	5	450	1580	500	NA	no advice
9	W	21	5	175	420	200	NA	no advice
10	M	28	5	200	680	200	NA	no advice
11	M	23	5	500	2000	500	NA	no advice
12	W	21	5	120	370	20	NA	no advice
13	M	21	5	700	1830	600	NA	no advice
14	M	21	5	700	1340	800	NA	no advice
15	W	23	5	350	910	50	NA	no advice
16	M	21	5	691	3160	691	NA	no advice
17	W	20	5	600	2440	670	NA	no advice
18	M	25	5	300	850	300	NA	no advice
19	W	22	5	2000	1220	2000	NA	no advice
20	W	19	5	1000	2800	1200	NA	no advice
21	W	23	5	400	1580	450	NA	no advice
22	M	21	5	220	1190	220	NA	no advice
23	W	21	5	500	2190	500	NA	no advice
24	W	18	5	350	1280	350	NA	no advice
25	W	20	5	250	1220	350	NA	no advice
26	M	20	5	900	1830	900	NA	no advice
27	M	21	5	0	3500	900	NA	no advice
28	W	20	5	800	2010	0	NA	no advice
1	W	20	6	600	720	720	20	somewhat competent
2	W	21	6	1000	1200	1100	20	somewhat competent
3	M	22	6	900	1080	900	20	somewhat competent
4	M	26	6	500	600	500	20	somewhat competent
5	W	21	6	1500	1800	1400	20	somewhat competent
6	M	22	6	300	360	300	20	somewhat competent
7	M	22	6	250	300	310	20	somewhat competent
8	M	31	6	0	1100	1200	20	somewhat competent
9	W	21	6	150	180	230	20	somewhat competent
10	M	28	6	180	210	180	20	somewhat competent
11	M	23	6	500	600	500	20	somewhat competent
12	W	21	6	11	2700	0	20	somewhat competent
13	M	21	6	1800	2160	2000	20	somewhat competent
14	M	21	6	500	600	500	20	somewhat competent
15	W	23	6	300	360	300	20	somewhat competent
16	M	21	6	791	940	0	20	somewhat competent
17	W	20	6	1200	1440	1200	20	somewhat competent
18	M	25	6	180	210	180	20	somewhat competent
19	W	22	6	1000	1200	1100	20	somewhat competent
20	W	19	6	4000	4800	4850	20	somewhat competent
21	W	23	6	600	720	600	20	somewhat competent
22	M	21	6	678	810	678	20	somewhat competent
23	W	21	6	700	840	700	20	somewhat competent
24	W	18	6	250	300	340	20	somewhat competent
25	W	20	6	350	420	350	20	somewhat competent
26	M	20	6	1000	1200	1000	20	somewhat competent
27	M	21	6	700	840	700	20	somewhat competent
28	W	20	6	1230	1470	1080	20	somewhat competent
1	W	20	7	500	630	555	26	completely incompetent
2	W	21	7	500	630	250	26	completely incompetent
3	M	22	7	500	630	500	26	completely incompetent
4	M	26	7	180	220	180	26	completely incompetent
5	W	21	7	400	500	300	26	completely incompetent
6	M	22	7	200	250	300	26	completely incompetent
7	M	22	7	200	250	200	26	completely incompetent
8	M	31	7	1200	1510	1300	26	completely incompetent
9	W	21	7	150	180	150	26	completely incompetent
10	M	28	7	150	180	150	26	completely incompetent
11	M	23	7	400	500	0	26	completely incompetent
12	W	21	7	70	3600	70	26	completely incompetent
13	M	21	7	500	630	500	26	completely incompetent
14	M	21	7	300	370	300	26	completely incompetent
15	W	23	7	450	560	500	26	completely incompetent
16	M	21	7	918	1150	918	26	completely incompetent
17	W	20	7	400	500	400	26	completely incompetent
18	M	25	7	300	370	300	26	completely incompetent
19	W	22	7	8000	2600	800	26	completely incompetent
20	W	19	7	1340	1680	1340	26	completely incompetent
21	W	23	7	400	500	300	26	completely incompetent
22	M	21	7	410	510	410	26	completely incompetent
23	W	21	7	300	370	300	26	completely incompetent
24	W	18	7	95	110	80	26	completely incompetent
25	W	20	7	300	370	300	26	completely incompetent
26	M	20	7	1200	1510	1000	26	completely incompetent
27	M	21	7	400	500	400	26	completely incompetent
28	W	20	7	1000	1260	900	26	completely incompetent
1	W	20	8	400	630	600	NA	no advice
2	W	21	8	470	630	1200	NA	no advice
3	M	22	8	400	630	400	NA	no advice
4	M	26	8	400	220	450	NA	no advice
5	W	21	8	2000	500	1500	NA	no advice
6	M	22	8	250	250	250	NA	no advice
7	M	22	8	300	250	300	NA	no advice
8	M	31	8	600	1510	550	NA	no advice
9	W	21	8	150	180	125	NA	no advice
10	M	28	8	100	180	200	NA	no advice
11	M	23	8	0	500	300	NA	no advice
12	W	21	8	80	3600	80	NA	no advice
13	M	21	8	800	630	800	NA	no advice
14	M	21	8	250	370	250	NA	no advice
15	W	23	8	600	560	600	NA	no advice
16	M	21	8	871	1150	871	NA	no advice
17	W	20	8	700	500	700	NA	no advice
18	M	25	8	170	370	120	NA	no advice
19	W	22	8	2000	2600	2000	NA	no advice
20	W	19	8	2600	1680	2350	NA	no advice
21	W	23	8	700	500	700	NA	no advice
22	M	21	8	200	510	200	NA	no advice
23	W	21	8	50	370	500	NA	no advice
24	W	18	8	75	110	75	NA	no advice
25	W	20	8	500	370	450	NA	no advice
26	M	20	8	1000	1510	1100	NA	no advice
27	M	21	8	700	500	700	NA	no advice
28	W	20	8	1700	1260	1500	NA	no advice
1	W	20	9	1000	820	943	-18	completely incompetent
2	W	21	9	590	480	2000	-18	completely incompetent
3	M	22	9	22	2400	2000	-18	completely incompetent
4	M	26	9	2000	1640	1900	-18	completely incompetent
5	W	21	9	1000	820	1500	-18	completely incompetent
6	M	22	9	950	770	950	-18	completely incompetent
7	M	22	9	600	490	600	-18	completely incompetent
8	M	31	9	2900	2370	2750	-18	completely incompetent
9	W	21	9	300	240	300	-18	completely incompetent
10	M	28	9	750	610	750	-18	completely incompetent
11	M	23	9	2000	1640	200	-18	completely incompetent
12	W	21	9	300	240	300	-18	completely incompetent
13	M	21	9	3700	3030	3500	-18	completely incompetent
14	M	21	9	0	600	2200	-18	completely incompetent
15	W	23	9	750	610	800	-18	completely incompetent
16	M	21	9	32	1300	1498	-18	completely incompetent
17	W	20	9	4000	3280	4000	-18	completely incompetent
18	M	25	9	1100	900	1000	-18	completely incompetent
19	W	22	9	1000	820	1000	-18	completely incompetent
20	W	19	9	2340	1910	2000	-18	completely incompetent
21	W	23	9	1000	820	900	-18	completely incompetent
22	M	21	9	2000	1640	2000	-18	completely incompetent
23	W	21	9	1	1300	1800	-18	completely incompetent
24	W	18	9	0	1100	1900	-18	completely incompetent
25	W	20	9	1600	1310	1500	-18	completely incompetent
26	M	20	9	2000	1640	2100	-18	completely incompetent
27	M	21	9	2000	1640	2000	-18	completely incompetent
28	W	20	9	2450	2000	2600	-18	completely incompetent
1	W	20	10	1252	1550	1564	24	somewhat competent
2	W	21	10	900	1110	980	24	somewhat competent
3	M	22	10	1550	1920	1550	24	somewhat competent
4	M	26	10	15	2400	2000	24	somewhat competent
5	W	21	10	800	990	750	24	somewhat competent
6	M	22	10	1000	1240	1000	24	somewhat competent
7	M	22	10	450	550	600	24	somewhat competent
8	M	31	10	1700	2100	1900	24	somewhat competent
9	W	21	10	275	340	300	24	somewhat competent
10	M	28	10	330	400	330	24	somewhat competent
11	M	23	10	1800	2230	2500	24	somewhat competent
12	W	21	10	3	1300	350	24	somewhat competent
13	M	21	10	2000	2480	2000	24	somewhat competent
14	M	21	10	1900	2350	2100	24	somewhat competent
15	W	23	10	1000	1240	1100	24	somewhat competent
16	M	21	10	0	1300	2410	24	somewhat competent
17	W	20	10	3000	3720	3500	24	somewhat competent
18	M	25	10	1000	1240	1000	24	somewhat competent
19	W	22	10	1500	1860	1900	24	somewhat competent
20	W	19	10	4000	4960	4800	24	somewhat competent
21	W	23	10	700	860	0	24	somewhat competent
22	M	21	10	9	900	940	24	somewhat competent
23	W	21	10	1500	1860	1700	24	somewhat competent
24	W	18	10	2500	3100	3500	24	somewhat competent
25	W	20	10	1000	1240	1200	24	somewhat competent
26	M	20	10	1200	1480	1300	24	somewhat competent
27	M	21	10	1000	1240	1300	24	somewhat competent
28	W	20	10	1500	1860	1350	24	somewhat competent
1	W	20	11	654	520	654	-20	completely incompetent
2	W	21	11	900	720	1200	-20	completely incompetent
3	M	22	11	800	640	800	-20	completely incompetent
4	M	26	11	330	260	300	-20	completely incompetent
5	W	21	11	600	480	700	-20	completely incompetent
6	M	22	11	450	360	450	-20	completely incompetent
7	M	22	11	150	120	180	-20	completely incompetent
8	M	31	11	600	480	550	-20	completely incompetent
9	W	21	11	75	3300	100	-20	completely incompetent
10	M	28	11	200	160	200	-20	completely incompetent
11	M	23	11	300	240	350	-20	completely incompetent
12	W	21	11	290	230	290	-20	completely incompetent
13	M	21	11	500	400	500	-20	completely incompetent
14	M	21	11	450	360	450	-20	completely incompetent
15	W	23	11	400	320	410	-20	completely incompetent
16	M	21	11	646	510	0	-20	completely incompetent
17	W	20	11	600	480	700	-20	completely incompetent
18	M	25	11	350	280	350	-20	completely incompetent
19	W	22	11	2000	1600	2000	-20	completely incompetent
20	W	19	11	1500	1200	1250	-20	completely incompetent
21	W	23	11	270	210	270	-20	completely incompetent
22	M	21	11	120	900	120	-20	completely incompetent
23	W	21	11	400	320	400	-20	completely incompetent
24	W	18	11	350	280	350	-20	completely incompetent
25	W	20	11	600	480	550	-20	completely incompetent
26	M	20	11	1400	1120	1400	-20	completely incompetent
27	M	21	11	500	400	500	-20	completely incompetent
28	W	20	11	600	480	300	-20	completely incompetent
1	W	20	12	705	900	956	28	somewhat competent
2	W	21	12	560	710	500	28	somewhat competent
3	M	22	12	600	760	600	28	somewhat competent
4	M	26	12	1000	1280	1100	28	somewhat competent
5	W	21	12	0	1100	700	28	somewhat competent
6	M	22	12	600	760	600	28	somewhat competent
7	M	22	12	290	370	350	28	somewhat competent
8	M	31	12	1400	1790	1500	28	somewhat competent
9	W	21	12	250	320	250	28	somewhat competent
10	M	28	12	2	2700	200	28	somewhat competent
11	M	23	12	0	900	900	28	somewhat competent
12	W	21	12	360	460	390	28	somewhat competent
13	M	21	12	900	1150	1000	28	somewhat competent
14	M	21	12	1200	1530	1300	28	somewhat competent
15	W	23	12	450	570	450	28	somewhat competent
16	M	21	12	291	370	2109	28	somewhat competent
17	W	20	12	2000	2560	2000	28	somewhat competent
18	M	25	12	650	830	800	28	somewhat competent
19	W	22	12	2000	2560	2700	28	somewhat competent
20	W	19	12	2500	3200	2500	28	somewhat competent
21	W	23	12	690	880	690	28	somewhat competent
22	M	21	12	650	830	650	28	somewhat competent
23	W	21	12	700	890	900	28	somewhat competent
24	W	18	12	1000	1280	1350	28	somewhat competent
25	W	20	12	1600	2040	1600	28	somewhat competent
26	M	20	12	1500	1920	1700	28	somewhat competent
27	M	21	12	1500	1920	1600	28	somewhat competent
28	W	20	12	2750	3520	0	28	somewhat competent
1	W	20	13	457	590	593	30	competent
2	W	21	13	300	390	350	30	competent
3	M	22	13	1000	1300	1300	30	competent
4	M	26	13	300	390	350	30	competent
5	W	21	13	500	650	600	30	competent
6	M	22	13	300	390	390	30	competent
7	M	22	13	100	130	120	30	competent
8	M	31	13	1100	1430	1200	30	competent
9	W	21	13	75	1300	100	30	competent
10	M	28	13	120	150	120	30	competent
11	M	23	13	450	580	450	30	competent
12	W	21	13	59	3400	100	30	competent
13	M	21	13	400	520	500	30	competent
14	M	21	13	200	260	250	30	competent
15	W	23	13	250	320	250	30	competent
16	M	21	13	561	720	679	30	competent
17	W	20	13	200	260	250	30	competent
18	M	25	13	300	390	300	30	competent
19	W	22	13	900	1170	1200	30	competent
20	W	19	13	1260	1630	1625	30	competent
21	W	23	13	400	520	400	30	competent
22	M	21	13	200	260	230	30	competent
23	W	21	13	200	260	200	30	competent
24	W	18	13	730	940	950	30	competent
25	W	20	13	600	780	700	30	competent
26	M	20	13	500	650	600	30	competent
27	M	21	13	500	650	600	30	competent
28	W	20	13	2650	3440	3500	30	competent
1	W	20	14	1	800	1355	40	somewhat competent
2	W	21	14	400	560	390	40	somewhat competent
3	M	22	14	454	630	454	40	somewhat competent
4	M	26	14	2900	4050	3000	40	somewhat competent
5	W	21	14	1200	1680	2000	40	somewhat competent
6	M	22	14	1200	1680	1200	40	somewhat competent
7	M	22	14	360	500	360	40	somewhat competent
8	M	31	14	3400	4760	3600	40	somewhat competent
9	W	21	14	500	700	600	40	somewhat competent
10	M	28	14	1000	1400	1100	40	somewhat competent
11	M	23	14	3500	4900	3500	40	somewhat competent
12	W	21	14	430	600	540	40	somewhat competent
13	M	21	14	4000	5600	4500	40	somewhat competent
14	M	21	14	2400	3360	2900	40	somewhat competent
15	W	23	14	1800	2520	2000	40	somewhat competent
16	M	21	14	1	2900	3	40	somewhat competent
17	W	20	14	5000	7000	5000	40	somewhat competent
18	M	25	14	2100	2940	2100	40	somewhat competent
19	W	22	14	2000	2800	2000	40	somewhat competent
20	W	19	14	6000	2700	5500	40	somewhat competent
21	W	23	14	1700	2380	1700	40	somewhat competent
22	M	21	14	2560	3580	2800	40	somewhat competent
23	W	21	14	2	4000	2000	40	somewhat competent
24	W	18	14	3400	4760	3600	40	somewhat competent
25	W	20	14	1600	2240	1900	40	somewhat competent
26	M	20	14	600	840	700	40	somewhat competent
27	M	21	14	2500	3500	2500	40	somewhat competent
28	W	20	14	1450	2020	1500	40	somewhat competent
1	W	20	15	950	800	1350	NA	no advice
2	W	21	15	3000	560	2500	NA	no advice
3	M	22	15	2800	630	2600	NA	no advice
4	M	26	15	13	4050	1300	NA	no advice
5	W	21	15	2500	1680	2500	NA	no advice
6	M	22	15	1300	1680	1300	NA	no advice
7	M	22	15	700	500	700	NA	no advice
8	M	31	15	2200	4760	2400	NA	no advice
9	W	21	15	800	700	700	NA	no advice
10	M	28	15	910	1400	880	NA	no advice
11	M	23	15	2000	4900	2000	NA	no advice
12	W	21	15	600	600	560	NA	no advice
13	M	21	15	3000	5600	3000	NA	no advice
14	M	21	15	2300	3360	2000	NA	no advice
15	W	23	15	1000	2520	1000	NA	no advice
16	M	21	15	0	2900	3213	NA	no advice
17	W	20	15	3000	7000	3200	NA	no advice
18	M	25	15	1800	2940	1700	NA	no advice
19	W	22	15	3000	2800	2500	NA	no advice
20	W	19	15	3600	2700	3600	NA	no advice
21	W	23	15	900	2380	900	NA	no advice
22	M	21	15	1700	3580	1700	NA	no advice
23	W	21	15	2500	4000	2100	NA	no advice
24	W	18	15	3800	4760	3800	NA	no advice
25	W	20	15	2000	2240	2200	NA	no advice
26	M	20	15	1200	840	1500	NA	no advice
27	M	21	15	600	3500	900	NA	no advice
28	W	20	15	2900	2020	2800	NA	no advice
1	W	20	16	1234	780	1354	-36	completely incompetent
2	W	21	16	500	320	760	-36	completely incompetent
3	M	22	16	700	440	700	-36	completely incompetent
4	M	26	16	1300	830	1200	-36	completely incompetent
5	W	21	16	1000	640	800	-36	completely incompetent
6	M	22	16	850	540	850	-36	completely incompetent
7	M	22	16	400	250	450	-36	completely incompetent
8	M	31	16	22	2600	2300	-36	completely incompetent
9	W	21	16	450	280	450	-36	completely incompetent
10	M	28	16	1000	640	870	-36	completely incompetent
11	M	23	16	1800	1150	1800	-36	completely incompetent
12	W	21	16	600	380	580	-36	completely incompetent
13	M	21	16	1200	760	1200	-36	completely incompetent
14	M	21	16	1500	960	1500	-36	completely incompetent
15	W	23	16	1600	1020	1600	-36	completely incompetent
16	M	21	16	1710	1090	1710	-36	completely incompetent
17	W	20	16	3400	2170	3000	-36	completely incompetent
18	M	25	16	1100	700	1100	-36	completely incompetent
19	W	22	16	2000	1280	1900	-36	completely incompetent
20	W	19	16	5000	3200	5000	-36	completely incompetent
21	W	23	16	1500	960	1500	-36	completely incompetent
22	M	21	16	1200	760	1100	-36	completely incompetent
23	W	21	16	2000	1280	2000	-36	completely incompetent
24	W	18	16	2800	1790	2890	-36	completely incompetent
25	W	20	16	1300	830	1200	-36	completely incompetent
26	M	20	16	1300	830	1300	-36	completely incompetent
27	M	21	16	1700	1080	1700	-36	completely incompetent
28	W	20	16	1680	1070	1750	-36	completely incompetent
1	W	20	17	567	740	0	32	competent
2	W	21	17	600	790	660	32	competent
3	M	22	17	1400	1840	1750	32	competent
4	M	26	17	300	390	320	32	competent
5	W	21	17	400	520	500	32	competent
6	M	22	17	300	390	390	32	competent
7	M	22	17	300	390	360	32	competent
8	M	31	17	800	1050	950	32	competent
9	W	21	17	75	1400	75	32	competent
10	M	28	17	450	590	470	32	competent
11	M	23	17	800	1050	800	32	competent
12	W	21	17	299	390	320	32	competent
13	M	21	17	1200	1580	1500	32	competent
14	M	21	17	350	460	450	32	competent
15	W	23	17	450	590	460	32	competent
16	M	21	17	971	1280	1121	32	competent
17	W	20	17	15	500	1500	32	competent
18	M	25	17	750	990	800	32	competent
19	W	22	17	700	920	900	32	competent
20	W	19	17	3200	4220	4000	32	competent
21	W	23	17	700	920	0	32	competent
22	M	21	17	250	330	290	32	competent
23	W	21	17	600	790	650	32	competent
24	W	18	17	900	1180	1250	32	competent
25	W	20	17	500	660	600	32	competent
26	M	20	17	500	660	600	32	competent
27	M	21	17	350	460	400	32	competent
28	W	20	17	1420	1870	1670	32	competent
1	W	20	18	789	740	990	NA	no advice
2	W	21	18	1000	790	890	NA	no advice
3	M	22	18	1200	1840	1200	NA	no advice
4	M	26	18	800	390	850	NA	no advice
5	W	21	18	1200	520	1200	NA	no advice
6	M	22	18	300	390	300	NA	no advice
7	M	22	18	300	390	300	NA	no advice
8	M	31	18	1000	1050	1100	NA	no advice
9	W	21	18	0	1400	250	NA	no advice
10	M	28	18	400	590	400	NA	no advice
11	M	23	18	0	1050	900	NA	no advice
12	W	21	18	280	390	9	NA	no advice
13	M	21	18	1200	1580	1200	NA	no advice
14	M	21	18	400	460	400	NA	no advice
15	W	23	18	450	590	400	NA	no advice
16	M	21	18	821	1280	821	NA	no advice
17	W	20	18	1500	500	1500	NA	no advice
18	M	25	18	0	990	800	NA	no advice
19	W	22	18	800	920	900	NA	no advice
20	W	19	18	2300	4220	2300	NA	no advice
21	W	23	18	900	920	900	NA	no advice
22	M	21	18	520	330	620	NA	no advice
23	W	21	18	900	790	900	NA	no advice
24	W	18	18	1460	1180	1570	NA	no advice
25	W	20	18	700	660	700	NA	no advice
26	M	20	18	400	660	400	NA	no advice
27	M	21	18	600	460	600	NA	no advice
28	W	20	18	1200	1870	1330	NA	no advice
1	W	20	19	0	800	0	-36	competent
2	W	21	19	550	350	590	-36	competent
3	M	22	19	0	2300	2300	-36	competent
4	M	26	19	0	1200	1200	-36	competent
5	W	21	19	400	250	300	-36	competent
6	M	22	19	650	410	410	-36	competent
7	M	22	19	190	120	170	-36	competent
8	M	31	19	1800	1150	1300	-36	competent
9	W	21	19	250	160	200	-36	competent
10	M	28	19	420	260	380	-36	competent
11	M	23	19	1800	1150	1500	-36	competent
12	W	21	19	299	190	210	-36	competent
13	M	21	19	2000	1280	1400	-36	competent
14	M	21	19	700	440	500	-36	competent
15	W	23	19	450	280	450	-36	competent
16	M	21	19	1111	710	811	-36	competent
17	W	20	19	1000	640	740	-36	competent
18	M	25	19	800	510	700	-36	competent
19	W	22	19	1000	640	700	-36	competent
20	W	19	19	2130	1360	1500	-36	competent
21	W	23	19	1000	640	800	-36	competent
22	M	21	19	876	560	680	-36	competent
23	W	21	19	1500	960	1300	-36	competent
24	W	18	19	2490	1590	2300	-36	competent
25	W	20	19	900	570	650	-36	competent
26	M	20	19	900	570	600	-36	competent
27	M	21	19	1200	760	0	-36	competent
28	W	20	19	2100	1340	1500	-36	competent
1	W	20	20	969	800	708	NA	no advice
2	W	21	20	790	350	883	NA	no advice
3	M	22	20	800	2300	900	NA	no advice
4	M	26	20	900	1200	900	NA	no advice
5	W	21	20	700	250	800	NA	no advice
6	M	22	20	700	410	700	NA	no advice
7	M	22	20	200	120	200	NA	no advice
8	M	31	20	1	1150	1600	NA	no advice
9	W	21	20	250	160	250	NA	no advice
10	M	28	20	210	260	300	NA	no advice
11	M	23	20	900	1150	900	NA	no advice
12	W	21	20	266	190	320	NA	no advice
13	M	21	20	1200	1280	1200	NA	no advice
14	M	21	20	0	440	1400	NA	no advice
15	W	23	20	350	280	350	NA	no advice
16	M	21	20	971	710	971	NA	no advice
17	W	20	20	800	640	1200	NA	no advice
18	M	25	20	550	510	500	NA	no advice
19	W	22	20	3000	640	300	NA	no advice
20	W	19	20	1500	1360	1500	NA	no advice
21	W	23	20	600	640	700	NA	no advice
22	M	21	20	1000	560	1000	NA	no advice
23	W	21	20	1500	960	1500	NA	no advice
24	W	18	20	2100	1590	1806	NA	no advice
25	W	20	20	700	570	750	NA	no advice
26	M	20	20	1000	570	1300	NA	no advice
27	M	21	20	800	760	800	NA	no advice
28	W	20	20	2750	1340	2400	NA	no advice
1	W	20	21	899	610	0	-32	somewhat competent
2	W	21	21	1500	1010	1500	-32	somewhat competent
3	M	22	21	800	540	750	-32	somewhat competent
4	M	26	21	500	330	490	-32	somewhat competent
5	W	21	21	1300	880	1200	-32	somewhat competent
6	M	22	21	300	200	300	-32	somewhat competent
7	M	22	21	350	230	350	-32	somewhat competent
8	M	31	21	700	470	650	-32	somewhat competent
9	W	21	21	250	160	225	-32	somewhat competent
10	M	28	21	280	190	250	-32	somewhat competent
11	M	23	21	350	230	300	-32	somewhat competent
12	W	21	21	340	230	310	-32	somewhat competent
13	M	21	21	900	610	750	-32	somewhat competent
14	M	21	21	1800	1220	1600	-32	somewhat competent
15	W	23	21	500	330	450	-32	somewhat competent
16	M	21	21	1012	680	1012	-32	somewhat competent
17	W	20	21	600	400	600	-32	somewhat competent
18	M	25	21	800	540	700	-32	somewhat competent
19	W	22	21	2000	1350	1500	-32	somewhat competent
20	W	19	21	2000	1350	2000	-32	somewhat competent
21	W	23	21	800	540	680	-32	somewhat competent
22	M	21	21	0	3600	400	-32	somewhat competent
23	W	21	21	350	230	350	-32	somewhat competent
24	W	18	21	790	530	700	-32	somewhat competent
25	W	20	21	600	400	5	-32	somewhat competent
26	M	20	21	800	540	650	-32	somewhat competent
27	M	21	21	3	3900	300	-32	somewhat competent
28	W	20	21	1630	1100	1300	-32	somewhat competent
1	W	20	22	12	2800	3005	26	competent
2	W	21	22	2900	3650	3500	26	competent
3	M	22	22	2200	2770	2500	26	competent
4	M	26	22	1500	1890	1700	26	competent
5	W	21	22	2000	2520	2400	26	competent
6	M	22	22	850	1070	1070	26	competent
7	M	22	22	0	3400	2500	26	competent
8	M	31	22	2600	3270	3000	26	competent
9	W	21	22	35	1400	400	26	competent
10	M	28	22	740	930	800	26	competent
11	M	23	22	2000	2520	2600	26	competent
12	W	21	22	499	620	580	26	competent
13	M	21	22	3500	4410	4200	26	competent
14	M	21	22	700	880	850	26	competent
15	W	23	22	500	630	550	26	competent
16	M	21	22	3110	3910	3799	26	competent
17	W	20	22	2000	2520	2200	26	competent
18	M	25	22	1000	1260	1000	26	competent
19	W	22	22	800	1000	1000	26	competent
20	W	19	22	2050	2580	2300	26	competent
21	W	23	22	800	1000	800	26	competent
22	M	21	22	1650	2070	1850	26	competent
23	W	21	22	1800	2260	2000	26	competent
24	W	18	22	2790	3510	2999	26	competent
25	W	20	22	2000	2520	2500	26	competent
26	M	20	22	1000	1260	1250	26	competent
27	M	21	22	700	880	700	26	competent
28	W	20	22	2130	2680	2420	26	competent
1	W	20	23	798	2800	0	NA	no advice
2	W	21	23	1730	3650	1730	NA	no advice
3	M	22	23	800	2770	750	NA	no advice
4	M	26	23	750	1890	751	NA	no advice
5	W	21	23	1200	2520	1400	NA	no advice
6	M	22	23	500	1070	450	NA	no advice
7	M	22	23	300	3400	300	NA	no advice
8	M	31	23	1600	3270	1500	NA	no advice
9	W	21	23	300	1400	300	NA	no advice
10	M	28	23	600	930	600	NA	no advice
11	M	23	23	600	2520	600	NA	no advice
12	W	21	23	6	620	688	NA	no advice
13	M	21	23	1000	4410	1000	NA	no advice
14	M	21	23	1400	880	1400	NA	no advice
15	W	23	23	600	630	600	NA	no advice
16	M	21	23	1381	3910	1381	NA	no advice
17	W	20	23	650	2520	450	NA	no advice
18	M	25	23	1300	1260	1500	NA	no advice
19	W	22	23	700	1000	1000	NA	no advice
20	W	19	23	3500	2580	3500	NA	no advice
21	W	23	23	640	1000	640	NA	no advice
22	M	21	23	630	2070	630	NA	no advice
23	W	21	23	800	2260	850	NA	no advice
24	W	18	23	1990	3510	2100	NA	no advice
25	W	20	23	900	2520	900	NA	no advice
26	M	20	23	700	1260	750	NA	no advice
27	M	21	23	500	880	700	NA	no advice
28	W	20	23	2	2680	2720	NA	no advice
1	W	20	24	900	2800	0	NA	no advice
2	W	21	24	390	3650	500	NA	no advice
3	M	22	24	1000	2770	1100	NA	no advice
4	M	26	24	9	1890	950	NA	no advice
5	W	21	24	1400	2520	2000	NA	no advice
6	M	22	24	600	1070	600	NA	no advice
7	M	22	24	400	3400	350	NA	no advice
8	M	31	24	1100	3270	950	NA	no advice
9	W	21	24	400	1400	400	NA	no advice
10	M	28	24	0	930	500	NA	no advice
11	M	23	24	700	2520	700	NA	no advice
12	W	21	24	288	620	290	NA	no advice
13	M	21	24	600	4410	600	NA	no advice
14	M	21	24	900	880	900	NA	no advice
15	W	23	24	250	630	450	NA	no advice
16	M	21	24	978	3910	978	NA	no advice
17	W	20	24	1000	2520	1200	NA	no advice
18	M	25	24	800	1260	750	NA	no advice
19	W	22	24	900	1000	1000	NA	no advice
20	W	19	24	4500	2580	4500	NA	no advice
21	W	23	24	1200	1000	1200	NA	no advice
22	M	21	24	700	2070	700	NA	no advice
23	W	21	24	70	2260	700	NA	no advice
24	W	18	24	1350	3510	1350	NA	no advice
25	W	20	24	500	2520	500	NA	no advice
26	M	20	24	700	1260	650	NA	no advice
27	M	21	24	600	880	600	NA	no advice
28	W	20	24	1130	2680	1320	NA	no advice
1	W	20	25	678	2800	678	NA	no advice
2	W	21	25	1000	3650	790	NA	no advice
3	M	22	25	0	2770	800	NA	no advice
4	M	26	25	1000	1890	1000	NA	no advice
5	W	21	25	500	2520	700	NA	no advice
6	M	22	25	500	1070	600	NA	no advice
7	M	22	25	150	3400	150	NA	no advice
8	M	31	25	950	3270	1000	NA	no advice
9	W	21	25	250	1400	200	NA	no advice
10	M	28	25	200	930	220	NA	no advice
11	M	23	25	0	2520	1200	NA	no advice
12	W	21	25	299	620	309	NA	no advice
13	M	21	25	800	4410	800	NA	no advice
14	M	21	25	600	880	600	NA	no advice
15	W	23	25	350	630	350	NA	no advice
16	M	21	25	791	3910	791	NA	no advice
17	W	20	25	2000	2520	2200	NA	no advice
18	M	25	25	500	1260	550	NA	no advice
19	W	22	25	1500	1000	1500	NA	no advice
20	W	19	25	2500	2580	2500	NA	no advice
21	W	23	25	500	1000	500	NA	no advice
22	M	21	25	348	2070	348	NA	no advice
23	W	21	25	1000	2260	1000	NA	no advice
24	W	18	25	1200	3510	1100	NA	no advice
25	W	20	25	800	2520	800	NA	no advice
26	M	20	25	600	1260	600	NA	no advice
27	M	21	25	900	880	900	NA	no advice
28	W	20	25	1550	2680	1430	NA	no advice
1	W	20	26	0	2800	0	-38	completely incompetent
2	W	21	26	3900	2410	3900	-38	completely incompetent
3	M	22	26	2670	1650	2670	-38	completely incompetent
4	M	26	26	2500	1550	2250	-38	completely incompetent
5	W	21	26	2000	1240	0	-38	completely incompetent
6	M	22	26	1500	930	1500	-38	completely incompetent
7	M	22	26	800	490	800	-38	completely incompetent
8	M	31	26	3100	1920	3000	-38	completely incompetent
9	W	21	26	650	400	700	-38	completely incompetent
10	M	28	26	1	1400	1100	-38	completely incompetent
11	M	23	26	1900	1170	1900	-38	completely incompetent
12	W	21	26	470	290	490	-38	completely incompetent
13	M	21	26	4800	2970	4800	-38	completely incompetent
14	M	21	26	2400	1480	2300	-38	completely incompetent
15	W	23	26	750	460	850	-38	completely incompetent
16	M	21	26	3411	2110	3411	-38	completely incompetent
17	W	20	26	3500	2170	3500	-38	completely incompetent
18	M	25	26	1500	930	1650	-38	completely incompetent
19	W	22	26	1500	930	1700	-38	completely incompetent
20	W	19	26	4000	2480	4000	-38	completely incompetent
21	W	23	26	1100	680	1100	-38	completely incompetent
22	M	21	26	2530	1560	2530	-38	completely incompetent
23	W	21	26	2	600	2300	-38	completely incompetent
24	W	18	26	4500	2790	4500	-38	completely incompetent
25	W	20	26	2600	1610	2600	-38	completely incompetent
26	M	20	26	600	370	1200	-38	completely incompetent
27	M	21	26	1200	740	1200	-38	completely incompetent
28	W	20	26	3430	2120	3600	-38	completely incompetent
1	W	20	27	500	660	0	32	somewhat competent
2	W	21	27	350	460	550	32	somewhat competent
3	M	22	27	12231	3000	1600	32	somewhat competent
4	M	26	27	100	130	105	32	somewhat competent
5	W	21	27	400	520	300	32	somewhat competent
6	M	22	27	200	260	200	32	somewhat competent
7	M	22	27	120	150	120	32	somewhat competent
8	M	31	27	450	590	460	32	somewhat competent
9	W	21	27	250	330	250	32	somewhat competent
10	M	28	27	100	130	120	32	somewhat competent
11	M	23	27	25	3900	200	32	somewhat competent
12	W	21	27	300	390	320	32	somewhat competent
13	M	21	27	500	660	600	32	somewhat competent
14	M	21	27	350	460	350	32	somewhat competent
15	W	23	27	250	330	250	32	somewhat competent
16	M	21	27	791	1040	791	32	somewhat competent
17	W	20	27	600	790	600	32	somewhat competent
18	M	25	27	250	330	220	32	somewhat competent
19	W	22	27	1500	1980	2000	32	somewhat competent
20	W	19	27	2500	3300	2500	32	somewhat competent
21	W	23	27	350	460	350	32	somewhat competent
22	M	21	27	150	190	150	32	somewhat competent
23	W	21	27	300	390	300	32	somewhat competent
24	W	18	27	230	300	230	32	somewhat competent
25	W	20	27	250	330	250	32	somewhat competent
26	M	20	27	600	790	650	32	somewhat competent
27	M	21	27	300	390	300	32	somewhat competent
28	W	20	27	1900	2500	0	32	somewhat competent
1	W	20	28	9	500	0	18	competent
2	W	21	28	1000	1180	1200	18	competent
3	M	22	28	NA	2600	2500	18	competent
4	M	26	28	1500	1770	1650	18	competent
5	W	21	28	1400	1650	1500	18	competent
6	M	22	28	500	590	590	18	competent
7	M	22	28	450	530	540	18	competent
8	M	31	28	1400	1650	1600	18	competent
9	W	21	28	275	320	300	18	competent
10	M	28	28	500	590	500	18	competent
11	M	23	28	0	2700	1900	18	competent
12	W	21	28	289	340	320	18	competent
13	M	21	28	1400	1650	1500	18	competent
14	M	21	28	700	820	800	18	competent
15	W	23	28	900	1060	900	18	competent
16	M	21	28	837	980	891	18	competent
17	W	20	28	0	4000	3200	18	competent
18	M	25	28	950	1120	1050	18	competent
19	W	22	28	1000	1180	1200	18	competent
20	W	19	28	250	290	2900	18	competent
21	W	23	28	700	820	750	18	competent
22	M	21	28	1100	1290	1200	18	competent
23	W	21	28	1200	1410	1250	18	competent
24	W	18	28	900	1060	900	18	competent
25	W	20	28	700	820	800	18	competent
26	M	20	28	700	820	800	18	competent
27	M	21	28	700	820	700	18	competent
28	W	20	28	1000	1180	0	18	competent
1	W	20	29	0	500	1000	NA	no advice
2	W	21	29	600	1180	760	NA	no advice
3	M	22	29	0	2600	1600	NA	no advice
4	M	26	29	1600	1770	1550	NA	no advice
5	W	21	29	350	1650	1350	NA	no advice
6	M	22	29	650	590	650	NA	no advice
7	M	22	29	450	530	455	NA	no advice
8	M	31	29	1800	1650	1950	NA	no advice
9	W	21	29	450	320	550	NA	no advice
10	M	28	29	850	590	850	NA	no advice
11	M	23	29	1200	2700	1000	NA	no advice
12	W	21	29	700	340	700	NA	no advice
13	M	21	29	2500	1650	2500	NA	no advice
14	M	21	29	1600	820	1600	NA	no advice
15	W	23	29	1300	1060	1300	NA	no advice
16	M	21	29	1391	980	1391	NA	no advice
17	W	20	29	2100	4000	2100	NA	no advice
18	M	25	29	1000	1120	0	NA	no advice
19	W	22	29	1500	1180	1500	NA	no advice
20	W	19	29	4000	290	4000	NA	no advice
21	W	23	29	11	820	1180	NA	no advice
22	M	21	29	0	1290	780	NA	no advice
23	W	21	29	2000	1410	2200	NA	no advice
24	W	18	29	1240	1060	1350	NA	no advice
25	W	20	29	1100	820	1100	NA	no advice
26	M	20	29	700	820	700	NA	no advice
27	M	21	29	1200	820	1200	NA	no advice
28	W	20	29	1410	1180	1500	NA	no advice
1	W	20	30	1500	2030	0	36	completely incompetent
2	W	21	30	590	800	930	36	completely incompetent
3	M	22	30	32123	1700	1400	36	completely incompetent
4	M	26	30	700	950	800	36	completely incompetent
5	W	21	30	600	810	600	36	completely incompetent
6	M	22	30	800	1080	800	36	completely incompetent
7	M	22	30	400	540	400	36	completely incompetent
8	M	31	30	2400	3260	2300	36	completely incompetent
9	W	21	30	350	470	350	36	completely incompetent
10	M	28	30	410	550	410	36	completely incompetent
11	M	23	30	1	1400	1000	36	completely incompetent
12	W	21	30	490	660	470	36	completely incompetent
13	M	21	30	2300	3120	2300	36	completely incompetent
14	M	21	30	2300	3120	2400	36	completely incompetent
15	W	23	30	1800	2440	1850	36	completely incompetent
16	M	21	30	1276	1730	1276	36	completely incompetent
17	W	20	30	2000	2710	2000	36	completely incompetent
18	M	25	30	1100	1490	1200	36	completely incompetent
19	W	22	30	2000	2710	2000	36	completely incompetent
20	W	19	30	3670	4990	3670	36	completely incompetent
21	W	23	30	1000	1350	1000	36	completely incompetent
22	M	21	30	820	1110	820	36	completely incompetent
23	W	21	30	1900	2580	1900	36	completely incompetent
24	W	18	30	3800	5160	4000	36	completely incompetent
25	W	20	30	900	1220	1000	36	completely incompetent
26	M	20	30	1000	1350	800	36	completely incompetent
27	M	21	30	1000	1350	1000	36	completely incompetent
28	W	20	30	2350	3190	2510	36	completely incompetent
1	W	20	31	12	2030	1500	NA	no advice
2	W	21	31	2900	800	2900	NA	no advice
3	M	22	31	349349	1700	1300	NA	no advice
4	M	26	31	2000	950	1900	NA	no advice
5	W	21	31	1900	810	2000	NA	no advice
6	M	22	31	1000	1080	1000	NA	no advice
7	M	22	31	2566	540	2566	NA	no advice
8	M	31	31	2900	3260	3000	NA	no advice
9	W	21	31	600	470	0	NA	no advice
10	M	28	31	1300	550	1300	NA	no advice
11	M	23	31	0	1400	1800	NA	no advice
12	W	21	31	700	660	688	NA	no advice
13	M	21	31	3700	3120	3700	NA	no advice
14	M	21	31	0	3120	2400	NA	no advice
15	W	23	31	800	2440	800	NA	no advice
16	M	21	31	3432	1730	3432	NA	no advice
17	W	20	31	2450	2710	4000	NA	no advice
18	M	25	31	1300	1490	1800	NA	no advice
19	W	22	31	2500	2710	2500	NA	no advice
20	W	19	31	4560	4990	4560	NA	no advice
21	W	23	31	1600	1350	1800	NA	no advice
22	M	21	31	2389	1110	2489	NA	no advice
23	W	21	31	3000	2580	3000	NA	no advice
24	W	18	31	3990	5160	3990	NA	no advice
25	W	20	31	2000	1220	2000	NA	no advice
26	M	20	31	1500	1350	1500	NA	no advice
27	M	21	31	2300	1350	2300	NA	no advice
28	W	20	31	2760	3190	2520	NA	no advice
1	W	20	32	700	430	0	-38	competent
2	W	21	32	440	270	390	-38	competent
3	M	22	32	560	340	360	-38	competent
4	M	26	32	300	180	200	-38	competent
5	W	21	32	500	310	400	-38	competent
6	M	22	32	200	120	120	-38	competent
7	M	22	32	200	120	200	-38	competent
8	M	31	32	550	340	380	-38	competent
9	W	21	32	150	1700	150	-38	competent
10	M	28	32	140	3200	180	-38	competent
11	M	23	32	300	180	250	-38	competent
12	W	21	32	270	160	190	-38	competent
13	M	21	32	400	240	300	-38	competent
14	M	21	32	450	270	300	-38	competent
15	W	23	32	400	240	400	-38	competent
16	M	21	32	621	380	420	-38	competent
17	W	20	32	500	310	400	-38	competent
18	M	25	32	250	150	210	-38	competent
19	W	22	32	900	550	650	-38	competent
20	W	19	32	3400	2100	2300	-38	competent
21	W	23	32	400	240	300	-38	competent
22	M	21	32	742	460	642	-38	competent
23	W	21	32	400	240	300	-38	competent
24	W	18	32	400	240	340	-38	competent
25	W	20	32	500	310	350	-38	competent
26	M	20	32	500	310	300	-38	competent
27	M	21	32	300	180	400	-38	competent
28	W	20	32	600	370	400	-38	competent
1	W	20	33	1000	430	1000	NA	no advice
2	W	21	33	3000	270	3100	NA	no advice
3	M	22	33	3700	340	2800	NA	no advice
4	M	26	33	1800	180	2000	NA	no advice
5	W	21	33	1000	310	1500	NA	no advice
6	M	22	33	550	120	750	NA	no advice
7	M	22	33	900	120	900	NA	no advice
8	M	31	33	3000	340	3100	NA	no advice
9	W	21	33	475	1700	475	NA	no advice
10	M	28	33	100	3200	1000	NA	no advice
11	M	23	33	900	180	1000	NA	no advice
12	W	21	33	360	160	345	NA	no advice
13	M	21	33	3500	240	0	NA	no advice
14	M	21	33	1600	270	1400	NA	no advice
15	W	23	33	400	240	700	NA	no advice
16	M	21	33	2121	380	2121	NA	no advice
17	W	20	33	900	310	980	NA	no advice
18	M	25	33	1600	150	1500	NA	no advice
19	W	22	33	2000	550	2000	NA	no advice
20	W	19	33	2100	2100	2100	NA	no advice
21	W	23	33	800	240	800	NA	no advice
22	M	21	33	0	460	980	NA	no advice
23	W	21	33	1500	240	1500	NA	no advice
24	W	18	33	2500	240	2700	NA	no advice
25	W	20	33	2400	310	2300	NA	no advice
26	M	20	33	400	310	400	NA	no advice
27	M	21	33	300	180	500	NA	no advice
28	W	20	33	2100	370	1900	NA	no advice
1	W	20	34	600	380	500	-36	somewhat competent
2	W	21	34	550	350	400	-36	somewhat competent
3	M	22	34	500	320	470	-36	somewhat competent
4	M	26	34	0	1500	200	-36	somewhat competent
5	W	21	34	500	320	450	-36	somewhat competent
6	M	22	34	300	190	250	-36	somewhat competent
7	M	22	34	100	3300	100	-36	somewhat competent
8	M	31	34	400	250	370	-36	somewhat competent
9	W	21	34	275	170	200	-36	somewhat competent
10	M	28	34	160	100	160	-36	somewhat competent
11	M	23	34	120	1500	120	-36	somewhat competent
12	W	21	34	240	150	190	-36	somewhat competent
13	M	21	34	450	280	350	-36	somewhat competent
14	M	21	34	350	220	350	-36	somewhat competent
15	W	23	34	350	220	350	-36	somewhat competent
16	M	21	34	791	500	0	-36	somewhat competent
17	W	20	34	700	440	600	-36	somewhat competent
18	M	25	34	170	100	160	-36	somewhat competent
19	W	22	34	900	570	500	-36	somewhat competent
20	W	19	34	1600	1020	1600	-36	somewhat competent
21	W	23	34	400	250	380	-36	somewhat competent
22	M	21	34	500	320	450	-36	somewhat competent
23	W	21	34	700	440	700	-36	somewhat competent
24	W	18	34	260	160	0	-36	somewhat competent
25	W	20	34	300	190	300	-36	somewhat competent
26	M	20	34	600	380	450	-36	somewhat competent
27	M	21	34	500	320	500	-36	somewhat competent
28	W	20	34	1010	640	980	-36	somewhat competent
1	W	20	35	1000	1350	1000	36	somewhat competent
2	W	21	35	1900	2580	2000	36	somewhat competent
3	M	22	35	890	1210	890	36	somewhat competent
4	M	26	35	2000	2710	2100	36	somewhat competent
5	W	21	35	1200	1630	1400	36	somewhat competent
6	M	22	35	650	880	650	36	somewhat competent
7	M	22	35	400	540	400	36	somewhat competent
8	M	31	35	1400	1900	1500	36	somewhat competent
9	W	21	35	400	540	450	36	somewhat competent
10	M	28	35	800	1080	870	36	somewhat competent
11	M	23	35	0	2300	1000	36	somewhat competent
12	W	21	35	279	370	340	36	somewhat competent
13	M	21	35	1000	1350	1180	36	somewhat competent
14	M	21	35	1800	2440	2000	36	somewhat competent
15	W	23	35	900	1220	1000	36	somewhat competent
16	M	21	35	1610	2180	1610	36	somewhat competent
17	W	20	35	1700	2310	1700	36	somewhat competent
18	M	25	35	900	1220	900	36	somewhat competent
19	W	22	35	2500	3390	3500	36	somewhat competent
20	W	19	35	4600	6250	4800	36	somewhat competent
21	W	23	35	1000	1350	1000	36	somewhat competent
22	M	21	35	680	920	700	36	somewhat competent
23	W	21	35	1800	2440	1900	36	somewhat competent
24	W	18	35	1030	1400	1040	36	somewhat competent
25	W	20	35	800	1080	850	36	somewhat competent
26	M	20	35	1900	2580	2300	36	somewhat competent
27	M	21	35	1500	2030	2700	36	somewhat competent
28	W	20	35	1200	1630	1400	36	somewhat competent
1	W	20	36	900	640	800	-28	somewhat competent
2	W	21	36	1900	1360	2100	-28	somewhat competent
3	M	22	36	0	2700	1900	-28	somewhat competent
4	M	26	36	1500	1080	1500	-28	somewhat competent
5	W	21	36	2000	1440	2000	-28	somewhat competent
6	M	22	36	850	610	850	-28	somewhat competent
7	M	22	36	2900	2080	2900	-28	somewhat competent
8	M	31	36	2300	1650	2200	-28	somewhat competent
9	W	21	36	400	280	400	-28	somewhat competent
10	M	28	36	900	640	900	-28	somewhat competent
11	M	23	36	1	2500	1500	-28	somewhat competent
12	W	21	36	540	380	450	-28	somewhat competent
13	M	21	36	3800	2730	3300	-28	somewhat competent
14	M	21	36	1300	930	1300	-28	somewhat competent
15	W	23	36	1200	860	1200	-28	somewhat competent
16	M	21	36	2710	1950	2310	-28	somewhat competent
17	W	20	36	2000	1440	1990	-28	somewhat competent
18	M	25	36	1200	860	1300	-28	somewhat competent
19	W	22	36	2000	1440	1700	-28	somewhat competent
20	W	19	36	4600	3310	4600	-28	somewhat competent
21	W	23	36	900	640	900	-28	somewhat competent
22	M	21	36	1200	860	1150	-28	somewhat competent
23	W	21	36	1500	1080	2000	-28	somewhat competent
24	W	18	36	1400	1000	1450	-28	somewhat competent
25	W	20	36	2200	1580	1800	-28	somewhat competent
26	M	20	36	1200	860	900	-28	somewhat competent
27	M	21	36	8	600	800	-28	somewhat competent
28	W	20	36	1900	1360	0	-28	somewhat competent
1	W	20	37	700	420	900	-40	somewhat competent
2	W	21	37	700	420	700	-40	somewhat competent
3	M	22	37	800	480	780	-40	somewhat competent
4	M	26	37	1000	600	900	-40	somewhat competent
5	W	21	37	1000	600	900	-40	somewhat competent
6	M	22	37	550	330	550	-40	somewhat competent
7	M	22	37	400	240	400	-40	somewhat competent
8	M	31	37	1200	720	1000	-40	somewhat competent
9	W	21	37	450	270	300	-40	somewhat competent
10	M	28	37	7	900	740	-40	somewhat competent
11	M	23	37	1500	900	1200	-40	somewhat competent
12	W	21	37	299	170	240	-40	somewhat competent
13	M	21	37	600	360	500	-40	somewhat competent
14	M	21	37	700	420	700	-40	somewhat competent
15	W	23	37	1000	600	1000	-40	somewhat competent
16	M	21	37	1211	720	1211	-40	somewhat competent
17	W	20	37	800	480	860	-40	somewhat competent
18	M	25	37	800	480	600	-40	somewhat competent
19	W	22	37	1500	900	700	-40	somewhat competent
20	W	19	37	4000	2400	3000	-40	somewhat competent
21	W	23	37	1200	720	1200	-40	somewhat competent
22	M	21	37	600	360	600	-40	somewhat competent
23	W	21	37	1200	720	1200	-40	somewhat competent
24	W	18	37	1259	750	1200	-40	somewhat competent
25	W	20	37	600	360	500	-40	somewhat competent
26	M	20	37	1200	720	0	-40	somewhat competent
27	M	21	37	1300	780	1300	-40	somewhat competent
28	W	20	37	1150	690	0	-40	somewhat competent
1	W	20	38	999	690	999	-30	competent
2	W	21	38	560	390	400	-30	competent
3	M	22	38	0	1000	19	-30	competent
4	M	26	38	1200	840	1000	-30	competent
5	W	21	38	800	560	650	-30	competent
6	M	22	38	750	520	520	-30	competent
7	M	22	38	290	200	250	-30	competent
8	M	31	38	2400	1680	2000	-30	competent
9	W	21	38	300	210	250	-30	competent
10	M	28	38	400	280	350	-30	competent
11	M	23	38	1000	700	900	-30	competent
12	W	21	38	350	240	240	-30	competent
13	M	21	38	1000	700	850	-30	competent
14	M	21	38	700	480	550	-30	competent
15	W	23	38	900	630	900	-30	competent
16	M	21	38	1791	1250	1341	-30	competent
17	W	20	38	900	630	780	-30	competent
18	M	25	38	900	630	700	-30	competent
19	W	22	38	1000	700	800	-30	competent
20	W	19	38	2000	1400	1500	-30	competent
21	W	23	38	600	420	550	-30	competent
22	M	21	38	850	590	675	-30	competent
23	W	21	38	1000	700	900	-30	competent
24	W	18	38	1200	840	1150	-30	competent
25	W	20	38	800	560	700	-30	competent
26	M	20	38	1200	840	850	-30	competent
27	M	21	38	500	350	450	-30	competent
28	W	20	38	950	660	670	-30	competent
1	W	20	39	678	470	678	-30	completely incompetent
2	W	21	39	500	350	670	-30	completely incompetent
3	M	22	39	500	350	450	-30	completely incompetent
4	M	26	39	400	280	380	-30	completely incompetent
5	W	21	39	800	560	750	-30	completely incompetent
6	M	22	39	350	240	350	-30	completely incompetent
7	M	22	39	250	170	250	-30	completely incompetent
8	M	31	39	550	380	530	-30	completely incompetent
9	W	21	39	220	150	220	-30	completely incompetent
10	M	28	39	280	190	280	-30	completely incompetent
11	M	23	39	400	280	400	-30	completely incompetent
12	W	21	39	450	310	430	-30	completely incompetent
13	M	21	39	800	560	700	-30	completely incompetent
14	M	21	39	500	350	500	-30	completely incompetent
15	W	23	39	700	480	700	-30	completely incompetent
16	M	21	39	981	680	981	-30	completely incompetent
17	W	20	39	400	280	400	-30	completely incompetent
18	M	25	39	300	210	300	-30	completely incompetent
19	W	22	39	1500	1050	1500	-30	completely incompetent
20	W	19	39	3240	2260	3240	-30	completely incompetent
21	W	23	39	500	350	500	-30	completely incompetent
22	M	21	39	250	170	260	-30	completely incompetent
23	W	21	39	500	350	500	-30	completely incompetent
24	W	18	39	390	270	390	-30	completely incompetent
25	W	20	39	500	350	400	-30	completely incompetent
26	M	20	39	900	630	800	-30	completely incompetent
27	M	21	39	500	350	500	-30	completely incompetent
28	W	20	39	1000	700	1300	-30	completely incompetent
1	W	20	40	998	1290	1234	30	completely incompetent
2	W	21	40	300	390	390	30	completely incompetent
3	M	22	40	1700	2210	1700	30	completely incompetent
4	M	26	40	800	1040	800	30	completely incompetent
5	W	21	40	600	780	900	30	completely incompetent
6	M	22	40	600	780	600	30	completely incompetent
7	M	22	40	300	390	300	30	completely incompetent
8	M	31	40	2100	2730	2100	30	completely incompetent
9	W	21	40	240	310	240	30	completely incompetent
10	M	28	40	400	520	480	30	completely incompetent
11	M	23	40	1200	1560	1000	30	completely incompetent
12	W	21	40	160	200	160	30	completely incompetent
13	M	21	40	600	780	700	30	completely incompetent
14	M	21	40	500	650	500	30	completely incompetent
15	W	23	40	900	1170	900	30	completely incompetent
16	M	21	40	439	570	439	30	completely incompetent
17	W	20	40	200	260	2000	30	completely incompetent
18	M	25	40	800	1040	850	30	completely incompetent
19	W	22	40	1000	1300	1000	30	completely incompetent
20	W	19	40	4230	5490	4250	30	completely incompetent
21	W	23	40	1300	1690	1300	30	completely incompetent
22	M	21	40	423	540	423	30	completely incompetent
23	W	21	40	2200	2860	2200	30	completely incompetent
24	W	18	40	750	970	750	30	completely incompetent
25	W	20	40	900	1170	1000	30	completely incompetent
26	M	20	40	500	650	500	30	completely incompetent
27	M	21	40	1600	2080	1900	30	completely incompetent
28	W	20	40	1200	1560	1100	30	completely incompetent
1	W	20	41	0	2000	2347	-30	somewhat competent
2	W	21	41	400	280	270	-30	somewhat competent
3	M	22	41	0	3900	1400	-30	somewhat competent
4	M	26	41	90	3600	900	-30	somewhat competent
5	W	21	41	450	310	450	-30	somewhat competent
6	M	22	41	550	380	550	-30	somewhat competent
7	M	22	41	300	210	300	-30	somewhat competent
8	M	31	41	1600	1120	1500	-30	somewhat competent
9	W	21	41	400	280	350	-30	somewhat competent
10	M	28	41	5	700	590	-30	somewhat competent
11	M	23	41	900	630	900	-30	somewhat competent
12	W	21	41	230	160	200	-30	somewhat competent
13	M	21	41	900	630	750	-30	somewhat competent
14	M	21	41	550	380	550	-30	somewhat competent
15	W	23	41	950	660	900	-30	somewhat competent
16	M	21	41	956	660	956	-30	somewhat competent
17	W	20	41	2000	1400	2300	-30	somewhat competent
18	M	25	41	750	520	750	-30	somewhat competent
19	W	22	41	400	280	400	-30	somewhat competent
20	W	19	41	2360	1650	1800	-30	somewhat competent
21	W	23	41	1000	700	100	-30	somewhat competent
22	M	21	41	730	510	730	-30	somewhat competent
23	W	21	41	1300	900	1300	-30	somewhat competent
24	W	18	41	450	310	700	-30	somewhat competent
25	W	20	41	900	630	750	-30	somewhat competent
26	M	20	41	900	630	750	-30	somewhat competent
27	M	21	41	2	1100	2000	-30	somewhat competent
28	W	20	41	1310	910	1420	-30	somewhat competent
1	W	20	42	1050	1340	1050	28	completely incompetent
2	W	21	42	500	640	550	28	completely incompetent
3	M	22	42	1200	1530	1300	28	completely incompetent
4	M	26	42	900	1150	900	28	completely incompetent
5	W	21	42	500	640	700	28	completely incompetent
6	M	22	42	450	570	450	28	completely incompetent
7	M	22	42	300	380	300	28	completely incompetent
8	M	31	42	1400	1790	1350	28	completely incompetent
9	W	21	42	250	320	240	28	completely incompetent
10	M	28	42	550	700	550	28	completely incompetent
11	M	23	42	900	1150	900	28	completely incompetent
12	W	21	42	88	110	60	28	completely incompetent
13	M	21	42	750	960	750	28	completely incompetent
14	M	21	42	400	510	400	28	completely incompetent
15	W	23	42	900	1150	900	28	completely incompetent
16	M	21	42	323	410	323	28	completely incompetent
17	W	20	42	2000	2560	2000	28	completely incompetent
18	M	25	42	750	960	750	28	completely incompetent
19	W	22	42	450	570	300	28	completely incompetent
20	W	19	42	1400	1790	1400	28	completely incompetent
21	W	23	42	900	1150	900	28	completely incompetent
22	M	21	42	540	690	540	28	completely incompetent
23	W	21	42	1100	1400	1000	28	completely incompetent
24	W	18	42	950	1210	900	28	completely incompetent
25	W	20	42	600	760	600	28	completely incompetent
26	M	20	42	600	760	600	28	completely incompetent
27	M	21	42	1900	2430	2000	28	completely incompetent
28	W	20	42	1000	1280	850	28	completely incompetent
1	W	20	43	900	1150	1050	28	competent
2	W	21	43	1900	2430	2500	28	competent
3	M	22	43	2200	2810	2400	28	competent
4	M	26	43	1500	1920	1900	28	competent
5	W	21	43	1900	2430	2300	28	competent
6	M	22	43	1200	1530	1530	28	competent
7	M	22	43	2400	3070	2800	28	competent
8	M	31	43	2100	2680	2400	28	competent
9	W	21	43	410	520	430	28	competent
10	M	28	43	95	120	950	28	competent
11	M	23	43	1800	2300	1800	28	competent
12	W	21	43	270	340	320	28	competent
13	M	21	43	3800	4860	4500	28	competent
14	M	21	43	1800	2300	2100	28	competent
15	W	23	43	1000	1280	1000	28	competent
16	M	21	43	1	2100	1999	28	competent
17	W	20	43	2567	3280	2900	28	competent
18	M	25	43	1200	1530	1400	28	competent
19	W	22	43	2000	2560	2500	28	competent
20	W	19	43	4360	5580	3500	28	competent
21	W	23	43	1130	1440	1130	28	competent
22	M	21	43	1465	1870	1565	28	competent
23	W	21	43	1600	2040	1850	28	competent
24	W	18	43	3600	4600	4500	28	competent
25	W	20	43	1900	2430	2300	28	competent
26	M	20	43	700	890	900	28	competent
27	M	21	43	700	890	800	28	competent
28	W	20	43	1600	2040	1900	28	competent
1	W	20	44	700	510	678	-26	competent
2	W	21	44	2000	1480	1900	-26	competent
3	M	22	44	1670	1230	1500	-26	competent
4	M	26	44	8	2600	1200	-26	competent
5	W	21	44	1200	880	100	-26	competent
6	M	22	44	850	620	620	-26	competent
7	M	22	44	2220	1640	2000	-26	competent
8	M	31	44	17	2900	2500	-26	competent
9	W	21	44	300	220	280	-26	competent
10	M	28	44	600	440	550	-26	competent
11	M	23	44	900	660	800	-26	competent
12	W	21	44	370	270	300	-26	competent
13	M	21	44	4000	2960	3500	-26	competent
14	M	21	44	500	370	400	-26	competent
15	W	23	44	1000	740	1000	-26	competent
16	M	21	44	1512	1110	1201	-26	competent
17	W	20	44	1400	1030	1200	-26	competent
18	M	25	44	1200	880	1200	-26	competent
19	W	22	44	2000	1480	1500	-26	competent
20	W	19	44	4000	2960	3000	-26	competent
21	W	23	44	1200	880	1200	-26	competent
22	M	21	44	1656	1220	1480	-26	competent
23	W	21	44	1000	740	900	-26	competent
24	W	18	44	2470	1820	2200	-26	competent
25	W	20	44	1800	1330	1500	-26	competent
26	M	20	44	1000	740	750	-26	competent
27	M	21	44	0	3700	2500	-26	competent
28	W	20	44	1400	1030	1150	-26	competent
1	W	20	45	789	520	850	-34	competent
2	W	21	45	900	590	670	-34	competent
3	M	22	45	900	590	890	-34	competent
4	M	26	45	800	520	650	-34	competent
5	W	21	45	0	3300	2500	-34	competent
6	M	22	45	500	320	320	-34	competent
7	M	22	45	300	190	250	-34	competent
8	M	31	45	1600	1050	1300	-34	competent
9	W	21	45	320	210	280	-34	competent
10	M	28	45	200	130	190	-34	competent
11	M	23	45	600	390	550	-34	competent
12	W	21	45	230	150	190	-34	competent
13	M	21	45	700	460	600	-34	competent
14	M	21	45	700	460	500	-34	competent
15	W	23	45	500	320	500	-34	competent
16	M	21	45	719	470	511	-34	competent
17	W	20	45	600	390	500	-34	competent
18	M	25	45	500	320	400	-34	competent
19	W	22	45	1500	980	1000	-34	competent
20	W	19	45	26800	3500	3500	-34	competent
21	W	23	45	700	460	600	-34	competent
22	M	21	45	450	290	320	-34	competent
23	W	21	45	1300	850	1150	-34	competent
24	W	18	45	1000	650	750	-34	competent
25	W	20	45	700	460	600	-34	competent
26	M	20	45	1000	650	650	-34	competent
27	M	21	45	0	2900	1200	-34	competent
28	W	20	45	1720	1130	1340	-34	competent
1	W	20	46	900	520	900	NA	no advice
2	W	21	46	500	590	500	NA	no advice
3	M	22	46	1000	590	1000	NA	no advice
4	M	26	46	900	520	900	NA	no advice
5	W	21	46	1200	3300	1200	NA	no advice
6	M	22	46	600	320	600	NA	no advice
7	M	22	46	280	190	280	NA	no advice
8	M	31	46	2000	1050	2100	NA	no advice
9	W	21	46	310	210	310	NA	no advice
10	M	28	46	430	130	430	NA	no advice
11	M	23	46	800	390	600	NA	no advice
12	W	21	46	310	150	260	NA	no advice
13	M	21	46	750	460	750	NA	no advice
14	M	21	46	800	460	1100	NA	no advice
15	W	23	46	790	320	1200	NA	no advice
16	M	21	46	981	470	981	NA	no advice
17	W	20	46	3000	390	3200	NA	no advice
18	M	25	46	650	320	650	NA	no advice
19	W	22	46	1500	980	2000	NA	no advice
20	W	19	46	2600	3500	2600	NA	no advice
21	W	23	46	1300	460	1300	NA	no advice
22	M	21	46	460	290	460	NA	no advice
23	W	21	46	1600	850	1600	NA	no advice
24	W	18	46	1360	650	1360	NA	no advice
25	W	20	46	600	460	650	NA	no advice
26	M	20	46	800	650	850	NA	no advice
27	M	21	46	2000	2900	2000	NA	no advice
28	W	20	46	1950	1130	0	NA	no advice
1	W	20	47	0	520	900	NA	no advice
2	W	21	47	1000	590	1200	NA	no advice
3	M	22	47	1550	590	1550	NA	no advice
4	M	26	47	1500	520	1600	NA	no advice
5	W	21	47	1900	3300	2400	NA	no advice
6	M	22	47	550	320	550	NA	no advice
7	M	22	47	400	190	400	NA	no advice
8	M	31	47	1500	1050	1450	NA	no advice
9	W	21	47	250	210	250	NA	no advice
10	M	28	47	330	130	360	NA	no advice
11	M	23	47	1000	390	1200	NA	no advice
12	W	21	47	290	150	310	NA	no advice
13	M	21	47	1800	460	1800	NA	no advice
14	M	21	47	1200	460	1300	NA	no advice
15	W	23	47	600	320	700	NA	no advice
16	M	21	47	918	470	918	NA	no advice
17	W	20	47	120	390	0	NA	no advice
18	M	25	47	750	320	750	NA	no advice
19	W	22	47	1500	980	1500	NA	no advice
20	W	19	47	2450	3500	2450	NA	no advice
21	W	23	47	800	460	800	NA	no advice
22	M	21	47	720	290	720	NA	no advice
23	W	21	47	1100	850	1100	NA	no advice
24	W	18	47	1270	650	1390	NA	no advice
25	W	20	47	900	460	900	NA	no advice
26	M	20	47	1000	650	850	NA	no advice
27	M	21	47	0	2900	900	NA	no advice
28	W	20	47	1120	1130	1000	NA	no advice
1	W	20	48	900	720	0	-20	somewhat competent
2	W	21	48	1000	800	1000	-20	somewhat competent
3	M	22	48	12	1300	1230	-20	somewhat competent
4	M	26	48	1400	1120	1400	-20	somewhat competent
5	W	21	48	400	320	450	-20	somewhat competent
6	M	22	48	350	280	350	-20	somewhat competent
7	M	22	48	500	400	500	-20	somewhat competent
8	M	31	48	2300	1840	2200	-20	somewhat competent
9	W	21	48	250	200	250	-20	somewhat competent
10	M	28	48	2	2900	280	-20	somewhat competent
11	M	23	48	0	1600	400	-20	somewhat competent
12	W	21	48	100	1000	500	-20	somewhat competent
13	M	21	48	1200	960	1200	-20	somewhat competent
14	M	21	48	1000	800	1000	-20	somewhat competent
15	W	23	48	700	560	700	-20	somewhat competent
16	M	21	48	920	730	920	-20	somewhat competent
17	W	20	48	700	560	650	-20	somewhat competent
18	M	25	48	600	480	600	-20	somewhat competent
19	W	22	48	800	640	800	-20	somewhat competent
20	W	19	48	2000	1600	2000	-20	somewhat competent
21	W	23	48	1000	800	1000	-20	somewhat competent
22	M	21	48	410	320	410	-20	somewhat competent
23	W	21	48	800	640	800	-20	somewhat competent
24	W	18	48	680	540	800	-20	somewhat competent
25	W	20	48	1000	800	900	-20	somewhat competent
26	M	20	48	600	480	560	-20	somewhat competent
27	M	21	48	700	560	700	-20	somewhat competent
28	W	20	48	910	720	660	-20	somewhat competent
1	W	20	49	899	530	899	-40	completely incompetent
2	W	21	49	600	360	900	-40	completely incompetent
3	M	22	49	500	300	500	-40	completely incompetent
4	M	26	49	0	900	700	-40	completely incompetent
5	W	21	49	900	540	900	-40	completely incompetent
6	M	22	49	350	210	350	-40	completely incompetent
7	M	22	49	250	150	250	-40	completely incompetent
8	M	31	49	700	420	680	-40	completely incompetent
9	W	21	49	300	180	300	-40	completely incompetent
10	M	28	49	240	140	240	-40	completely incompetent
11	M	23	49	300	180	300	-40	completely incompetent
12	W	21	49	340	200	350	-40	completely incompetent
13	M	21	49	800	480	700	-40	completely incompetent
14	M	21	49	700	420	700	-40	completely incompetent
15	W	23	49	400	240	400	-40	completely incompetent
16	M	21	49	1001	600	981	-40	completely incompetent
17	W	20	49	700	420	700	-40	completely incompetent
18	M	25	49	300	180	250	-40	completely incompetent
19	W	22	49	1000	600	1100	-40	completely incompetent
20	W	19	49	2400	1440	2200	-40	completely incompetent
21	W	23	49	800	480	800	-40	completely incompetent
22	M	21	49	810	480	810	-40	completely incompetent
23	W	21	49	1100	660	1100	-40	completely incompetent
24	W	18	49	1000	600	1020	-40	completely incompetent
25	W	20	49	500	300	400	-40	completely incompetent
26	M	20	49	850	510	860	-40	completely incompetent
27	M	21	49	700	420	700	-40	completely incompetent
28	W	20	49	1300	780	0	-40	completely incompetent
1	W	20	50	800	920	890	16	completely incompetent
2	W	21	50	500	580	500	16	completely incompetent
3	M	22	50	0	1400	1809	16	completely incompetent
4	M	26	50	1000	1160	100	16	completely incompetent
5	W	21	50	600	690	800	16	completely incompetent
6	M	22	50	550	630	550	16	completely incompetent
7	M	22	50	200	230	200	16	completely incompetent
8	M	31	50	1300	1500	1350	16	completely incompetent
9	W	21	50	330	380	330	16	completely incompetent
10	M	28	50	380	440	380	16	completely incompetent
11	M	23	50	1000	1160	1000	16	completely incompetent
12	W	21	50	280	320	280	16	completely incompetent
13	M	21	50	1000	1160	1000	16	completely incompetent
14	M	21	50	1600	1850	1600	16	completely incompetent
15	W	23	50	900	1040	900	16	completely incompetent
16	M	21	50	868	1000	858	16	completely incompetent
17	W	20	50	1200	1390	1100	16	completely incompetent
18	M	25	50	850	980	1000	16	completely incompetent
19	W	22	50	1000	1160	1200	16	completely incompetent
20	W	19	50	2130	2470	2130	16	completely incompetent
21	W	23	50	690	800	690	16	completely incompetent
22	M	21	50	1010	1170	1010	16	completely incompetent
23	W	21	50	1000	1160	1000	16	completely incompetent
24	W	18	50	1360	1570	1970	16	completely incompetent
25	W	20	50	800	920	850	16	completely incompetent
26	M	20	50	900	1040	850	16	completely incompetent
27	M	21	50	700	810	700	16	completely incompetent
28	W	20	50	1000	1160	900	16	completely incompetent
1	W	20	51	900	1260	900	40	competent
2	W	21	51	900	1260	900	40	competent
3	M	22	51	1	800	1800	40	competent
4	M	26	51	100	140	1200	40	competent
5	W	21	51	500	700	650	40	competent
6	M	22	51	700	970	970	40	competent
7	M	22	51	125	170	160	40	competent
8	M	31	51	1300	1810	1600	40	competent
9	W	21	51	300	420	350	40	competent
10	M	28	51	300	420	350	40	competent
11	M	23	51	1000	1400	1200	40	competent
12	W	21	51	230	320	280	40	competent
13	M	21	51	800	1120	1000	40	competent
14	M	21	51	800	1120	1000	40	competent
15	W	23	51	700	970	700	40	competent
16	M	21	51	491	680	645	40	competent
17	W	20	51	1500	2100	1900	40	competent
18	M	25	51	550	770	650	40	competent
19	W	22	51	1300	1810	1900	40	competent
20	W	19	51	2450	3430	2450	40	competent
21	W	23	51	890	1240	1000	40	competent
22	M	21	51	486	680	586	40	competent
23	W	21	51	1300	1810	1600	40	competent
24	W	18	51	1750	2450	2170	40	competent
25	W	20	51	800	1120	1000	40	competent
26	M	20	51	600	840	850	40	competent
27	M	21	51	1500	2100	1800	40	competent
28	W	20	51	1420	1980	1760	40	competent
1	W	20	52	1399	1670	1577	20	completely incompetent
2	W	21	52	1900	2280	3000	20	completely incompetent
3	M	22	52	3000	3600	3300	20	completely incompetent
4	M	26	52	1900	2280	2000	20	completely incompetent
5	W	21	52	2000	2400	2300	20	completely incompetent
6	M	22	52	1100	1320	1100	20	completely incompetent
7	M	22	52	3000	3600	3000	20	completely incompetent
8	M	31	52	2800	3360	2800	20	completely incompetent
9	W	21	52	580	690	550	20	completely incompetent
10	M	28	52	1050	1260	1050	20	completely incompetent
11	M	23	52	180	210	1800	20	completely incompetent
12	W	21	52	340	400	320	20	completely incompetent
13	M	21	52	4000	4800	4200	20	completely incompetent
14	M	21	52	2000	2400	2000	20	completely incompetent
15	W	23	52	1600	1920	1700	20	completely incompetent
16	M	21	52	1710	2050	1710	20	completely incompetent
17	W	20	52	3000	3600	3200	20	completely incompetent
18	M	25	52	1800	2160	1800	20	completely incompetent
19	W	22	52	1500	1800	1500	20	completely incompetent
20	W	19	52	3640	4360	3640	20	completely incompetent
21	W	23	52	1340	1600	1340	20	completely incompetent
22	M	21	52	1	2900	2100	20	completely incompetent
23	W	21	52	2400	2880	3000	20	completely incompetent
24	W	18	52	3890	4660	3800	20	completely incompetent
25	W	20	52	2200	2640	2350	20	completely incompetent
26	M	20	52	1200	1440	1500	20	completely incompetent
27	M	21	52	2500	3000	2500	20	completely incompetent
28	W	20	52	2600	3120	2750	20	completely incompetent
1	W	20	53	799	1080	1150	36	competent
2	W	21	53	2500	3390	2900	36	competent
3	M	22	53	31	3800	1500	36	competent
4	M	26	53	600	810	700	36	competent
5	W	21	53	2000	2710	2650	36	competent
6	M	22	53	730	990	990	36	competent
7	M	22	53	2851	3870	3500	36	competent
8	M	31	53	1600	2170	1900	36	competent
9	W	21	53	560	760	600	36	competent
10	M	28	53	600	810	660	36	competent
11	M	23	53	500	670	500	36	competent
12	W	21	53	270	360	340	36	competent
13	M	21	53	4000	5430	4500	36	competent
14	M	21	53	1000	1350	1300	36	competent
15	W	23	53	790	1070	890	36	competent
16	M	21	53	1490	2020	1991	36	competent
17	W	20	53	3400	4620	4200	36	competent
18	M	25	53	900	1220	950	36	competent
19	W	22	53	1600	2170	2000	36	competent
20	W	19	53	3450	4690	3900	36	competent
21	W	23	53	750	1010	890	36	competent
22	M	21	53	1613	2190	1713	36	competent
23	W	21	53	800	1080	900	36	competent
24	W	18	53	1200	1630	1570	36	competent
25	W	20	53	2000	2710	2200	36	competent
26	M	20	53	1000	1350	1350	36	competent
27	M	21	53	1200	1630	1400	36	competent
28	W	20	53	1850	2510	2330	36	competent
1	W	20	54	1222	1440	6	18	completely incompetent
2	W	21	54	600	700	800	18	completely incompetent
3	M	22	54	1670	1970	1670	18	completely incompetent
4	M	26	54	700	820	700	18	completely incompetent
5	W	21	54	1200	1410	1200	18	completely incompetent
6	M	22	54	600	700	600	18	completely incompetent
7	M	22	54	300	350	300	18	completely incompetent
8	M	31	54	2000	2360	2100	18	completely incompetent
9	W	21	54	480	560	460	18	completely incompetent
10	M	28	54	390	460	390	18	completely incompetent
11	M	23	54	1	600	900	18	completely incompetent
12	W	21	54	3	1900	450	18	completely incompetent
13	M	21	54	3000	3540	3200	18	completely incompetent
14	M	21	54	2000	2360	2000	18	completely incompetent
15	W	23	54	900	1060	900	18	completely incompetent
16	M	21	54	1386	1630	1271	18	completely incompetent
17	W	20	54	2000	2360	2300	18	completely incompetent
18	M	25	54	900	1060	900	18	completely incompetent
19	W	22	54	2000	2360	2000	18	completely incompetent
20	W	19	54	4500	5310	4500	18	completely incompetent
21	W	23	54	1100	1290	1100	18	completely incompetent
22	M	21	54	666	780	666	18	completely incompetent
23	W	21	54	1800	2120	1800	18	completely incompetent
24	W	18	54	1780	2100	1800	18	completely incompetent
25	W	20	54	700	820	700	18	completely incompetent
26	M	20	54	1000	1180	1050	18	completely incompetent
27	M	21	54	40	1100	600	18	completely incompetent
28	W	20	54	1000	1180	900	18	completely incompetent
1	W	20	55	1233	1650	1333	34	competent
2	W	21	55	200	260	260	34	competent
3	M	22	55	1300	1740	1350	34	competent
4	M	26	55	900	1200	1000	34	competent
5	W	21	55	600	800	750	34	competent
6	M	22	55	550	730	730	34	competent
7	M	22	55	300	400	380	34	competent
8	M	31	55	1500	2010	1700	34	competent
9	W	21	55	460	610	540	34	competent
10	M	28	55	400	530	440	34	competent
11	M	23	55	600	800	800	34	competent
12	W	21	55	320	420	370	34	competent
13	M	21	55	1000	1340	1200	34	competent
14	M	21	55	700	930	900	34	competent
15	W	23	55	900	1200	900	34	competent
16	M	21	55	871	1160	1090	34	competent
17	W	20	55	2800	3750	3200	34	competent
18	M	25	55	600	800	750	34	competent
19	W	22	55	1500	2010	2000	34	competent
20	W	19	55	3680	4930	3680	34	competent
21	W	23	55	1100	1470	1350	34	competent
22	M	21	55	487	650	487	34	competent
23	W	21	55	1300	1740	1500	34	competent
24	W	18	55	1200	1600	1370	34	competent
25	W	20	55	700	930	850	34	competent
26	M	20	55	900	1200	1200	34	competent
27	M	21	55	1800	2410	2300	34	competent
28	W	20	55	1750	2340	22	34	competent
1	W	20	56	1200	1650	1200	NA	no advice
2	W	21	56	900	260	900	NA	no advice
3	M	22	56	0	1740	1400	NA	no advice
4	M	26	56	1900	1200	2000	NA	no advice
5	W	21	56	650	800	800	NA	no advice
6	M	22	56	900	730	900	NA	no advice
7	M	22	56	0	400	300	NA	no advice
8	M	31	56	1900	2010	1800	NA	no advice
9	W	21	56	600	610	560	NA	no advice
10	M	28	56	680	530	700	NA	no advice
11	M	23	56	920	800	950	NA	no advice
12	W	21	56	0	420	260	NA	no advice
13	M	21	56	900	1340	1000	NA	no advice
14	M	21	56	1600	930	1500	NA	no advice
15	W	23	56	1300	1200	1100	NA	no advice
16	M	21	56	901	1160	901	NA	no advice
17	W	20	56	12	3750	1200	NA	no advice
18	M	25	56	850	800	850	NA	no advice
19	W	22	56	2000	2010	2000	NA	no advice
20	W	19	56	4230	4930	4230	NA	no advice
21	W	23	56	1360	1470	1360	NA	no advice
22	M	21	56	570	650	570	NA	no advice
23	W	21	56	1800	1740	0	NA	no advice
24	W	18	56	1980	1600	2000	NA	no advice
25	W	20	56	1000	930	1000	NA	no advice
26	M	20	56	1500	1200	1600	NA	no advice
27	M	21	56	2000	2410	2000	NA	no advice
28	W	20	56	0	2340	2850	NA	no advice
1	W	20	57	900	1200	1100	34	completely incompetent
2	W	21	57	500	670	500	34	completely incompetent
3	M	22	57	1350	1800	1350	34	completely incompetent
4	M	26	57	1200	1600	1300	34	completely incompetent
5	W	21	57	1000	1340	900	34	completely incompetent
6	M	22	57	800	1070	800	34	completely incompetent
7	M	22	57	300	400	300	34	completely incompetent
8	M	31	57	2300	3080	2400	34	completely incompetent
9	W	21	57	4	600	480	34	completely incompetent
10	M	28	57	0	2400	450	34	completely incompetent
11	M	23	57	900	1200	850	34	completely incompetent
12	W	21	57	540	720	610	34	completely incompetent
13	M	21	57	800	1070	800	34	completely incompetent
14	M	21	57	900	1200	900	34	completely incompetent
15	W	23	57	1400	1870	1500	34	completely incompetent
16	M	21	57	1001	1340	1009	34	completely incompetent
17	W	20	57	54	2100	2540	34	completely incompetent
18	M	25	57	600	800	850	34	completely incompetent
19	W	22	57	1000	1340	1000	34	completely incompetent
20	W	19	57	5230	7000	5230	34	completely incompetent
21	W	23	57	1600	2140	1600	34	completely incompetent
22	M	21	57	480	640	480	34	completely incompetent
23	W	21	57	0	3600	1900	34	completely incompetent
24	W	18	57	1470	1960	1470	34	completely incompetent
25	W	20	57	800	1070	800	34	completely incompetent
26	M	20	57	1200	1600	1300	34	completely incompetent
27	M	21	57	2000	2680	2500	34	completely incompetent
28	W	20	57	1520	2030	0	34	completely incompetent
1	W	20	58	890	740	88	-16	completely incompetent
2	W	21	58	500	420	500	-16	completely incompetent
3	M	22	58	0	1400	700	-16	completely incompetent
4	M	26	58	800	670	800	-16	completely incompetent
5	W	21	58	1200	1000	1400	-16	completely incompetent
6	M	22	58	450	370	450	-16	completely incompetent
7	M	22	58	400	330	400	-16	completely incompetent
8	M	31	58	900	750	850	-16	completely incompetent
9	W	21	58	430	360	430	-16	completely incompetent
10	M	28	58	0	1100	600	-16	completely incompetent
11	M	23	58	750	630	800	-16	completely incompetent
12	W	21	58	640	530	640	-16	completely incompetent
13	M	21	58	400	330	400	-16	completely incompetent
14	M	21	58	700	580	700	-16	completely incompetent
15	W	23	58	900	750	900	-16	completely incompetent
16	M	21	58	0	3700	2100	-16	completely incompetent
17	W	20	58	700	580	700	-16	completely incompetent
18	M	25	58	600	500	600	-16	completely incompetent
19	W	22	58	1000	840	1000	-16	completely incompetent
20	W	19	58	3640	3050	3650	-16	completely incompetent
21	W	23	58	1698	1420	1698	-16	completely incompetent
22	M	21	58	364	300	364	-16	completely incompetent
23	W	21	58	700	580	700	-16	completely incompetent
24	W	18	58	970	810	970	-16	completely incompetent
25	W	20	58	600	500	600	-16	completely incompetent
26	M	20	58	700	580	700	-16	completely incompetent
27	M	21	58	1000	840	1000	-16	completely incompetent
28	W	20	58	1700	1420	1300	-16	completely incompetent
1	W	20	59	0	740	700	NA	no advice
2	W	21	59	300	420	400	NA	no advice
3	M	22	59	1200	1400	1000	NA	no advice
4	M	26	59	1500	670	1400	NA	no advice
5	W	21	59	500	1000	700	NA	no advice
6	M	22	59	450	370	450	NA	no advice
7	M	22	59	220	330	220	NA	no advice
8	M	31	59	900	750	770	NA	no advice
9	W	21	59	175	360	175	NA	no advice
10	M	28	59	350	1100	350	NA	no advice
11	M	23	59	920	630	920	NA	no advice
12	W	21	59	340	530	450	NA	no advice
13	M	21	59	1200	330	1200	NA	no advice
14	M	21	59	600	580	600	NA	no advice
15	W	23	59	800	750	800	NA	no advice
16	M	21	59	456	3700	487	NA	no advice
17	W	20	59	0	580	500	NA	no advice
18	M	25	59	700	500	700	NA	no advice
19	W	22	59	1400	840	1000	NA	no advice
20	W	19	59	2450	3050	2450	NA	no advice
21	W	23	59	590	1420	700	NA	no advice
22	M	21	59	650	300	720	NA	no advice
23	W	21	59	1000	580	1000	NA	no advice
24	W	18	59	1107	810	1100	NA	no advice
25	W	20	59	600	500	600	NA	no advice
26	M	20	59	900	580	300	NA	no advice
27	M	21	59	400	840	400	NA	no advice
28	W	20	59	1000	1420	900	NA	no advice
1	W	20	60	1111	680	800	-38	somewhat competent
2	W	21	60	1300	800	900	-38	somewhat competent
3	M	22	60	1450	890	1450	-38	somewhat competent
4	M	26	60	1000	620	950	-38	somewhat competent
5	W	21	60	1600	990	1500	-38	somewhat competent
6	M	22	60	500	310	500	-38	somewhat competent
7	M	22	60	180	110	180	-38	somewhat competent
8	M	31	60	1000	620	900	-38	somewhat competent
9	W	21	60	275	170	240	-38	somewhat competent
10	M	28	60	270	160	270	-38	somewhat competent
11	M	23	60	800	490	800	-38	somewhat competent
12	W	21	60	200	120	170	-38	somewhat competent
13	M	21	60	1300	800	1100	-38	somewhat competent
14	M	21	60	700	430	600	-38	somewhat competent
15	W	23	60	700	430	700	-38	somewhat competent
16	M	21	60	531	320	531	-38	somewhat competent
17	W	20	60	1200	740	1000	-38	somewhat competent
18	M	25	60	500	310	500	-38	somewhat competent
19	W	22	60	1500	930	1300	-38	somewhat competent
20	W	19	60	3640	2250	3500	-38	somewhat competent
21	W	23	60	1000	620	900	-38	somewhat competent
22	M	21	60	543	330	543	-38	somewhat competent
23	W	21	60	1900	1170	1900	-38	somewhat competent
24	W	18	60	980	600	980	-38	somewhat competent
25	W	20	60	500	310	450	-38	somewhat competent
26	M	20	60	500	310	450	-38	somewhat competent
27	M	21	60	1700	1050	1700	-38	somewhat competent
28	W	20	60	1450	890	0	-38	somewhat competent
1	W	20	61	1050	680	1050	NA	no advice
2	W	21	61	300	800	390	NA	no advice
3	M	22	61	0	890	1400	NA	no advice
4	M	26	61	1230	620	1230	NA	no advice
5	W	21	61	1000	990	1000	NA	no advice
6	M	22	61	750	310	800	NA	no advice
7	M	22	61	320	110	320	NA	no advice
8	M	31	61	1800	620	1700	NA	no advice
9	W	21	61	400	170	370	NA	no advice
10	M	28	61	500	160	480	NA	no advice
11	M	23	61	1200	490	1200	NA	no advice
12	W	21	61	450	120	510	NA	no advice
13	M	21	61	800	800	800	NA	no advice
14	M	21	61	700	430	600	NA	no advice
15	W	23	61	800	430	900	NA	no advice
16	M	21	61	912	320	912	NA	no advice
17	W	20	61	1500	740	1340	NA	no advice
18	M	25	61	550	310	750	NA	no advice
19	W	22	61	1700	930	1700	NA	no advice
20	W	19	61	2360	2250	2360	NA	no advice
21	W	23	61	1100	620	1100	NA	no advice
22	M	21	61	950	330	950	NA	no advice
23	W	21	61	2000	1170	2000	NA	no advice
24	W	18	61	1070	600	1070	NA	no advice
25	W	20	61	700	310	700	NA	no advice
26	M	20	61	800	310	800	NA	no advice
27	M	21	61	2300	1050	2300	NA	no advice
28	W	20	61	2200	890	1	NA	no advice
1	W	20	62	1000	1180	1000	18	somewhat competent
2	W	21	62	900	1060	990	18	somewhat competent
3	M	22	62	0	2300	1650	18	somewhat competent
4	M	26	62	2000	2360	2100	18	somewhat competent
5	W	21	62	2000	2360	2100	18	somewhat competent
6	M	22	62	950	1120	950	18	somewhat competent
7	M	22	62	650	760	650	18	somewhat competent
8	M	31	62	1500	1770	1600	18	somewhat competent
9	W	21	62	300	350	330	18	somewhat competent
10	M	28	62	780	920	780	18	somewhat competent
11	M	23	62	1500	1770	1400	18	somewhat competent
12	W	21	62	420	490	450	18	somewhat competent
13	M	21	62	3000	3540	3300	18	somewhat competent
14	M	21	62	1500	1770	1500	18	somewhat competent
15	W	23	62	1200	1410	1200	18	somewhat competent
16	M	21	62	837	980	837	18	somewhat competent
17	W	20	62	3000	3540	3200	18	somewhat competent
18	M	25	62	1200	1410	1200	18	somewhat competent
19	W	22	62	1700	2000	1900	18	somewhat competent
20	W	19	62	3690	4350	3690	18	somewhat competent
21	W	23	62	1600	1880	1600	18	somewhat competent
22	M	21	62	0	2800	1450	18	somewhat competent
23	W	21	62	2500	2950	2500	18	somewhat competent
24	W	18	62	1460	1720	1305	18	somewhat competent
25	W	20	62	1500	1770	1500	18	somewhat competent
26	M	20	62	1200	1410	1200	18	somewhat competent
27	M	21	62	1800	2120	1900	18	somewhat competent
28	W	20	62	1810	2130	1650	18	somewhat competent
1	W	20	63	0	1300	1250	-28	completely incompetent
2	W	21	63	400	280	400	-28	completely incompetent
3	M	22	63	700	500	700	-28	completely incompetent
4	M	26	63	300	210	300	-28	completely incompetent
5	W	21	63	850	610	900	-28	completely incompetent
6	M	22	63	500	360	500	-28	completely incompetent
7	M	22	63	260	180	260	-28	completely incompetent
8	M	31	63	700	500	670	-28	completely incompetent
9	W	21	63	210	150	210	-28	completely incompetent
10	M	28	63	180	120	180	-28	completely incompetent
11	M	23	63	0	600	600	-28	completely incompetent
12	W	21	63	55	3800	60	-28	completely incompetent
13	M	21	63	400	280	350	-28	completely incompetent
14	M	21	63	700	500	700	-28	completely incompetent
15	W	23	63	100	3500	100	-28	completely incompetent
16	M	21	63	434	310	434	-28	completely incompetent
17	W	20	63	880	630	900	-28	completely incompetent
18	M	25	63	350	250	350	-28	completely incompetent
19	W	22	63	1500	1080	1200	-28	completely incompetent
20	W	19	63	2560	1840	2560	-28	completely incompetent
21	W	23	63	1000	720	1000	-28	completely incompetent
22	M	21	63	465	330	465	-28	completely incompetent
23	W	21	63	1800	1290	1800	-28	completely incompetent
24	W	18	63	320	230	340	-28	completely incompetent
25	W	20	63	650	460	550	-28	completely incompetent
26	M	20	63	300	210	150	-28	completely incompetent
27	M	21	63	1	2700	1300	-28	completely incompetent
28	W	20	63	1520	1090	1000	-28	completely incompetent
1	W	20	64	500	330	400	-32	completely incompetent
2	W	21	64	500	330	400	-32	completely incompetent
3	M	22	64	0	700	140	-32	completely incompetent
4	M	26	64	200	130	200	-32	completely incompetent
5	W	21	64	500	330	0	-32	completely incompetent
6	M	22	64	150	100	150	-32	completely incompetent
7	M	22	64	80	2400	80	-32	completely incompetent
8	M	31	64	350	230	330	-32	completely incompetent
9	W	21	64	200	130	200	-32	completely incompetent
10	M	28	64	10	1700	100	-32	completely incompetent
11	M	23	64	0	1400	50	-32	completely incompetent
12	W	21	64	70	1000	80	-32	completely incompetent
13	M	21	64	300	200	300	-32	completely incompetent
14	M	21	64	300	200	300	-32	completely incompetent
15	W	23	64	400	270	300	-32	completely incompetent
16	M	21	64	323	210	323	-32	completely incompetent
17	W	20	64	450	300	450	-32	completely incompetent
18	M	25	64	65	3300	65	-32	completely incompetent
19	W	22	64	1500	1010	1200	-32	completely incompetent
20	W	19	64	2600	1760	2600	-32	completely incompetent
21	W	23	64	370	250	450	-32	completely incompetent
22	M	21	64	534	360	534	-32	completely incompetent
23	W	21	64	500	330	500	-32	completely incompetent
24	W	18	64	350	230	400	-32	completely incompetent
25	W	20	64	300	200	300	-32	completely incompetent
26	M	20	64	400	270	220	-32	completely incompetent
27	M	21	64	1300	880	900	-32	completely incompetent
28	W	20	64	600	400	320	-32	completely incompetent
1	W	20	65	700	330	800	NA	no advice
2	W	21	65	900	330	900	NA	no advice
3	M	22	65	0	700	780	NA	no advice
4	M	26	65	1500	130	1300	NA	no advice
5	W	21	65	1900	330	1900	NA	no advice
6	M	22	65	350	100	400	NA	no advice
7	M	22	65	600	2400	600	NA	no advice
8	M	31	65	1400	230	1600	NA	no advice
9	W	21	65	240	130	210	NA	no advice
10	M	28	65	500	1700	450	NA	no advice
11	M	23	65	150	1400	1500	NA	no advice
12	W	21	65	350	1000	390	NA	no advice
13	M	21	65	1800	200	1800	NA	no advice
14	M	21	65	700	200	700	NA	no advice
15	W	23	65	1000	270	1100	NA	no advice
16	M	21	65	671	210	671	NA	no advice
17	W	20	65	800	300	800	NA	no advice
18	M	25	65	700	3300	700	NA	no advice
19	W	22	65	1000	1010	1000	NA	no advice
20	W	19	65	3400	1760	3400	NA	no advice
21	W	23	65	800	250	800	NA	no advice
22	M	21	65	790	360	790	NA	no advice
23	W	21	65	1100	330	1100	NA	no advice
24	W	18	65	890	230	890	NA	no advice
25	W	20	65	700	200	700	NA	no advice
26	M	20	65	500	270	450	NA	no advice
27	M	21	65	1000	880	1000	NA	no advice
28	W	20	65	1000	400	850	NA	no advice
1	W	20	66	900	660	870	-26	somewhat competent
2	W	21	66	500	370	250	-26	somewhat competent
3	M	22	66	0	3200	2200	-26	somewhat competent
4	M	26	66	1400	1030	1400	-26	somewhat competent
5	W	21	66	900	660	900	-26	somewhat competent
6	M	22	66	900	660	800	-26	somewhat competent
7	M	22	66	360	260	360	-26	somewhat competent
8	M	31	66	1300	960	1100	-26	somewhat competent
9	W	21	66	270	190	240	-26	somewhat competent
10	M	28	66	310	220	310	-26	somewhat competent
11	M	23	66	1800	1330	1000	-26	somewhat competent
12	W	21	66	310	220	300	-26	somewhat competent
13	M	21	66	2000	1480	1700	-26	somewhat competent
14	M	21	66	1800	1330	1800	-26	somewhat competent
15	W	23	66	1200	880	1100	-26	somewhat competent
16	M	21	66	813	600	813	-26	somewhat competent
17	W	20	66	0	3300	3200	-26	somewhat competent
18	M	25	66	850	620	850	-26	somewhat competent
19	W	22	66	1200	880	1000	-26	somewhat competent
20	W	19	66	4890	3610	4890	-26	somewhat competent
21	W	23	66	1000	740	890	-26	somewhat competent
22	M	21	66	843	620	820	-26	somewhat competent
23	W	21	66	1900	1400	1900	-26	somewhat competent
24	W	18	66	1890	1390	1940	-26	somewhat competent
25	W	20	66	800	590	700	-26	somewhat competent
26	M	20	66	800	590	600	-26	somewhat competent
27	M	21	66	900	660	900	-26	somewhat competent
28	W	20	66	820	600	560	-26	somewhat competent
1	W	20	67	789	660	0	-16	competent
2	W	21	67	3000	2520	2500	-16	competent
3	M	22	67	1150	960	1050	-16	competent
4	M	26	67	700	580	650	-16	competent
5	W	21	67	500	420	4	-16	competent
6	M	22	67	500	420	420	-16	competent
7	M	22	67	2600	2180	2600	-16	competent
8	M	31	67	1500	1260	1300	-16	competent
9	W	21	67	375	310	330	-16	competent
10	M	28	67	600	500	600	-16	competent
11	M	23	67	0	1000	500	-16	competent
12	W	21	67	280	230	260	-16	competent
13	M	21	67	4000	3360	3700	-16	competent
14	M	21	67	500	420	450	-16	competent
15	W	23	67	700	580	700	-16	competent
16	M	21	67	546	450	541	-16	competent
17	W	20	67	1200	1000	1000	-16	competent
18	M	25	67	800	670	700	-16	competent
19	W	22	67	800	670	700	-16	competent
20	W	19	67	3450	2890	3450	-16	competent
21	W	23	67	600	500	600	-16	competent
22	M	21	67	560	470	530	-16	competent
23	W	21	67	900	750	800	-16	competent
24	W	18	67	900	750	1200	-16	competent
25	W	20	67	1900	1590	1650	-16	competent
26	M	20	67	150	120	120	-16	competent
27	M	21	67	300	250	250	-16	competent
28	W	20	67	1900	1590	1650	-16	competent
1	W	20	68	1000	1240	1145	24	completely incompetent
2	W	21	68	1000	1240	1200	24	completely incompetent
3	M	22	68	1150	1420	1050	24	completely incompetent
4	M	26	68	1600	1980	1700	24	completely incompetent
5	W	21	68	1900	2350	2000	24	completely incompetent
6	M	22	68	800	990	800	24	completely incompetent
7	M	22	68	700	860	700	24	completely incompetent
8	M	31	68	1000	1240	1050	24	completely incompetent
9	W	21	68	270	330	270	24	completely incompetent
10	M	28	68	7	1700	700	24	completely incompetent
11	M	23	68	1500	1860	1500	24	completely incompetent
12	W	21	68	350	430	340	24	completely incompetent
13	M	21	68	2500	3100	2700	24	completely incompetent
14	M	21	68	1300	1610	1300	24	completely incompetent
15	W	23	68	1300	1610	1400	24	completely incompetent
16	M	21	68	1212	1500	1212	24	completely incompetent
17	W	20	68	3000	3720	3200	24	completely incompetent
18	M	25	68	650	800	650	24	completely incompetent
19	W	22	68	1000	1240	1100	24	completely incompetent
20	W	19	68	2560	3170	2560	24	completely incompetent
21	W	23	68	1000	1240	1000	24	completely incompetent
22	M	21	68	670	830	670	24	completely incompetent
23	W	21	68	1700	2100	1700	24	completely incompetent
24	W	18	68	2480	3070	2580	24	completely incompetent
25	W	20	68	1000	1240	1200	24	completely incompetent
26	M	20	68	1000	1240	1060	24	completely incompetent
27	M	21	68	1200	1480	1200	24	completely incompetent
28	W	20	68	1000	1240	0	24	completely incompetent
1	W	20	69	1500	1950	1500	30	somewhat competent
2	W	21	69	2000	2600	2300	30	somewhat competent
3	M	22	69	0	3400	1360	30	somewhat competent
4	M	26	69	2100	2730	2500	30	somewhat competent
5	W	21	69	2300	2990	2400	30	somewhat competent
6	M	22	69	700	910	750	30	somewhat competent
7	M	22	69	800	1040	850	30	somewhat competent
8	M	31	69	1600	2080	1800	30	somewhat competent
9	W	21	69	345	440	360	30	somewhat competent
10	M	28	69	8	3200	800	30	somewhat competent
11	M	23	69	1500	1950	1400	30	somewhat competent
12	W	21	69	360	460	380	30	somewhat competent
13	M	21	69	3000	3900	3500	30	somewhat competent
14	M	21	69	2200	2860	2200	30	somewhat competent
15	W	23	69	1400	1820	1500	30	somewhat competent
16	M	21	69	1657	2150	1657	30	somewhat competent
17	W	20	69	3200	4160	3400	30	somewhat competent
18	M	25	69	1050	1360	1050	30	somewhat competent
19	W	22	69	1400	1820	1500	30	somewhat competent
20	W	19	69	3600	4680	3600	30	somewhat competent
21	W	23	69	1300	1690	1300	30	somewhat competent
22	M	21	69	13	3000	1380	30	somewhat competent
23	W	21	69	1900	2470	1900	30	somewhat competent
24	W	18	69	3070	3990	3070	30	somewhat competent
25	W	20	69	1500	1950	1600	30	somewhat competent
26	M	20	69	1600	2080	1900	30	somewhat competent
27	M	21	69	1000	1300	1000	30	somewhat competent
28	W	20	69	1450	1880	1350	30	somewhat competent
1	W	20	70	0	2600	1050	38	completely incompetent
2	W	21	70	600	820	750	38	completely incompetent
3	M	22	70	1150	1580	1150	38	completely incompetent
4	M	26	70	600	820	700	38	completely incompetent
5	W	21	70	1600	2200	1700	38	completely incompetent
6	M	22	70	950	1310	1036	38	completely incompetent
7	M	22	70	0	1500	350	38	completely incompetent
8	M	31	70	700	960	670	38	completely incompetent
9	W	21	70	270	370	270	38	completely incompetent
10	M	28	70	420	570	420	38	completely incompetent
11	M	23	70	1000	1380	1000	38	completely incompetent
12	W	21	70	560	770	600	38	completely incompetent
13	M	21	70	1400	1930	1400	38	completely incompetent
14	M	21	70	1600	2200	1400	38	completely incompetent
15	W	23	70	800	1100	800	38	completely incompetent
16	M	21	70	791	1090	791	38	completely incompetent
17	W	20	70	2	1300	1590	38	completely incompetent
18	M	25	70	1200	1650	1200	38	completely incompetent
19	W	22	70	1500	2070	1900	38	completely incompetent
20	W	19	70	4000	5520	4000	38	completely incompetent
21	W	23	70	1000	1380	1000	38	completely incompetent
22	M	21	70	540	740	540	38	completely incompetent
23	W	21	70	2200	3030	2200	38	completely incompetent
24	W	18	70	790	1090	790	38	completely incompetent
25	W	20	70	900	1240	1100	38	completely incompetent
26	M	20	70	700	960	800	38	completely incompetent
27	M	21	70	1600	2200	1600	38	completely incompetent
28	W	20	70	1800	2480	1900	38	completely incompetent
1	W	20	71	900	1180	1050	32	completely incompetent
2	W	21	71	2000	2640	2300	32	completely incompetent
3	M	22	71	0	4000	3300	32	completely incompetent
4	M	26	71	2600	3430	2900	32	completely incompetent
5	W	21	71	1900	2500	2000	32	completely incompetent
6	M	22	71	1100	1450	1100	32	completely incompetent
7	M	22	71	2900	3820	2900	32	completely incompetent
8	M	31	71	2800	3690	2800	32	completely incompetent
9	W	21	71	645	850	700	32	completely incompetent
10	M	28	71	920	1210	1020	32	completely incompetent
11	M	23	71	1500	1980	1500	32	completely incompetent
12	W	21	71	750	990	750	32	completely incompetent
13	M	21	71	4500	5940	4500	32	completely incompetent
14	M	21	71	1300	1710	1400	32	completely incompetent
15	W	23	71	1000	1320	1000	32	completely incompetent
16	M	21	71	2999	3950	3100	32	completely incompetent
17	W	20	71	800	1050	890	32	completely incompetent
18	M	25	71	1800	2370	1800	32	completely incompetent
19	W	22	71	1500	1980	2000	32	completely incompetent
20	W	19	71	3685	4860	3685	32	completely incompetent
21	W	23	71	900	1180	1300	32	completely incompetent
22	M	21	71	970	1280	975	32	completely incompetent
23	W	21	71	1300	1710	1300	32	completely incompetent
24	W	18	71	1800	2370	1830	32	completely incompetent
25	W	20	71	3000	3960	3300	32	completely incompetent
26	M	20	71	1000	1320	1000	32	completely incompetent
27	M	21	71	300	390	300	32	completely incompetent
28	W	20	71	1700	2240	1600	32	completely incompetent
1	W	20	72	700	970	800	40	completely incompetent
2	W	21	72	290	400	390	40	completely incompetent
3	M	22	72	700	970	700	40	completely incompetent
4	M	26	72	0	3400	1000	40	completely incompetent
5	W	21	72	1000	1400	1000	40	completely incompetent
6	M	22	72	800	1120	800	40	completely incompetent
7	M	22	72	350	480	350	40	completely incompetent
8	M	31	72	1100	1540	1150	40	completely incompetent
9	W	21	72	350	480	325	40	completely incompetent
10	M	28	72	400	560	400	40	completely incompetent
11	M	23	72	0	2900	900	40	completely incompetent
[truncated: 801 more rows]
