# Supplementary material for: On the Inability to Ignore Useless Advice
Source: Atypon-hosted journal article supplement (doi:10.1027/1618-3169/a000361), 2017-05-01
Supplement: 1618-3169_a000361_esm2.csv [file 1618-3169_a000361_esm2.csv]

VP	gender	age	SOW_adv1	SOW_adv2	SOW_rdm	trial	IE	AD	FE	DEV	condition
1	M	25	0.7	0.35	0	1	450	290	400	-34	random number
2	M	29	0.3	0.1	0	1	350	230	320	-34	random number
3	M	23	0.35	0.15	0.25	1	350	230	250	-34	random number
4	W	25	0.8	0.1	0	1	1800	1180	1800	-34	random number
5	M	24	0.67	0.34	0.02	1	420	270	415	-34	random number
6	W	30	0.8	0.4	0	1	1500	980	900	-34	random number
7	W	22	0.75	0.25	0	1	600	390	520	-34	random number
8	W	20	0.8	0.2	0	1	300	190	300	-34	random number
9	M	23	0.4	0.1	0	1	550	360	690	-34	random number
10	W	20	0.9	0.15	0.1	1	1000	650	750	-34	random number
11	M	23	0.4	0.05	0	1	350	230	350	-34	random number
12	M	24	0.05	0	0	1	600	390	400	-34	random number
13	M	23	0.6	0.3	0.1	1	1500	980	1400	-34	random number
14	W	22	0.9	0.2	0	1	800	520	750	-34	random number
15	W	24	0.75	0.45	0.05	1	1230	810	980	-34	random number
16	W	26	0.5	0.1	0	1	700	460	650	-34	random number
17	M	22	0.5	0.1	0	1	800	520	NA	-34	random number
18	M	26	0.65	0.4	0.15	1	650	420	600	-34	random number
19	W	27	0.9	0.1	0.2	1	780	510	750	-34	random number
20	W	23	0.7	0.05	0	1	600	390	550	-34	random number
21	W	23	0.8	0.2	0	1	500	320	500	-34	random number
22	W	20	0.7	0	0	1	15000	3600	15000	-34	random number
23	M	21	0.7	0.2	0	1	600	390	600	-34	random number
24	M	23	0.75	0.15	0.33	1	650	420	550	-34	random number
25	M	23	0.4	0.05	0.25	1	410	270	350	-34	random number
26	W	25	0.4	0.1	0.05	1	600	390	600	-34	random number
27	W	20	0.85	0.1	0	1	400	260	500	-34	random number
28	M	21	0.8	0.3	0.5	1	400	260	350	-34	random number
29	M	31	0.4	0	0.2	1	3000	1970	2400	-34	random number
1	M	25	0.7	0.35	0	2	1200	910	1100	-24	random number
2	M	29	0.3	0.1	0	2	1650	1250	1600	-24	random number
3	M	23	0.35	0.15	0.25	2	780	590	780	-24	random number
4	W	25	0.8	0.1	0	2	3800	2880	3800	-24	random number
5	M	24	0.67	0.34	0.02	2	890	670	878	-24	random number
6	W	30	0.8	0.4	0	2	200	150	2000	-24	random number
7	W	22	0.75	0.25	0	2	3100	2350	NA	-24	random number
8	W	20	0.8	0.2	0	2	400	300	400	-24	random number
9	M	23	0.4	0.1	0	2	1400	1060	1400	-24	random number
10	W	20	0.9	0.15	0.1	2	1200	910	1200	-24	random number
11	M	23	0.4	0.05	0	2	600	450	550	-24	random number
12	M	24	0.05	0	0	2	2100	1590	1800	-24	random number
13	M	23	0.6	0.3	0.1	2	3000	2280	3000	-24	random number
14	W	22	0.9	0.2	0	2	1400	1060	1300	-24	random number
15	W	24	0.75	0.45	0.05	2	2300	1740	2300	-24	random number
16	W	26	0.5	0.1	0	2	2600	1970	2500	-24	random number
17	M	22	0.5	0.1	0	2	2500	1900	2500	-24	random number
18	M	26	0.65	0.4	0.15	2	850	640	800	-24	random number
19	W	27	0.9	0.1	0.2	2	1100	830	1100	-24	random number
20	W	23	0.7	0.05	0	2	950	720	1000	-24	random number
21	W	23	0.8	0.2	0	2	1200	910	1200	-24	random number
22	W	20	0.7	0	0	2	12000	1300	NA	-24	random number
23	M	21	0.7	0.2	0	2	2100	1590	2100	-24	random number
24	M	23	0.75	0.15	0.33	2	1600	1210	1600	-24	random number
25	M	23	0.4	0.05	0.25	2	1100	830	1100	-24	random number
26	W	25	0.4	0.1	0.05	2	3500	2660	3400	-24	random number
27	W	20	0.85	0.1	0	2	800	600	800	-24	random number
28	M	21	0.8	0.3	0.5	2	1400	1060	1200	-24	random number
29	M	31	0.4	0	0.2	2	4400	3340	3800	-24	random number
1	M	25	0.7	0.35	0	3	1500	1830	1500	22	somewhat competent
2	M	29	0.3	0.1	0	3	890	1080	920	22	somewhat competent
3	M	23	0.35	0.15	0.25	3	1000	1220	1100	22	somewhat competent
4	W	25	0.8	0.1	0	3	2800	3410	2800	22	somewhat competent
5	M	24	0.67	0.34	0.02	3	600	730	547	22	somewhat competent
6	W	30	0.8	0.4	0	3	2500	3050	2400	22	somewhat competent
7	W	22	0.75	0.25	0	3	1700	2070	1900	22	somewhat competent
8	W	20	0.8	0.2	0	3	1500	1830	1600	22	somewhat competent
9	M	23	0.4	0.1	0	3	850	1030	800	22	somewhat competent
10	W	20	0.9	0.15	0.1	3	NA	3700	3650	22	somewhat competent
11	M	23	0.4	0.05	0	3	550	670	580	22	somewhat competent
12	M	24	0.05	0	0	3	670	810	670	22	somewhat competent
13	M	23	0.6	0.3	0.1	3	2000	2440	2500	22	somewhat competent
14	W	22	0.9	0.2	0	3	2000	2440	2000	22	somewhat competent
15	W	24	0.75	0.45	0.05	3	1980	2410	2010	22	somewhat competent
16	W	26	0.5	0.1	0	3	1800	2190	1950	22	somewhat competent
17	M	22	0.5	0.1	0	3	1000	1220	1050	22	somewhat competent
18	M	26	0.65	0.4	0.15	3	750	910	750	22	somewhat competent
19	W	27	0.9	0.1	0.2	3	990	1200	1000	22	somewhat competent
20	W	23	0.7	0.05	0	3	1050	1280	1050	22	somewhat competent
21	W	23	0.8	0.2	0	3	1300	1580	1650	22	somewhat competent
22	W	20	0.7	0	0	3	19000	3700	19000	22	somewhat competent
23	M	21	0.7	0.2	0	3	1400	1700	1500	22	somewhat competent
24	M	23	0.75	0.15	0.33	3	900	1090	900	22	somewhat competent
25	M	23	0.4	0.05	0.25	3	700	850	700	22	somewhat competent
26	W	25	0.4	0.1	0.05	3	2500	3050	2400	22	somewhat competent
27	W	20	0.85	0.1	0	3	900	1090	900	22	somewhat competent
28	M	21	0.8	0.3	0.5	3	400	480	450	22	somewhat competent
29	M	31	0.4	0	0.2	3	5342	6510	5999	22	somewhat competent
1	M	25	0.7	0.35	0	4	1240	1830	1140	NA	no advice
2	M	29	0.3	0.1	0	4	1300	1080	1300	NA	no advice
3	M	23	0.35	0.15	0.25	4	950	1220	950	NA	no advice
4	W	25	0.8	0.1	0	4	3400	3410	4000	NA	no advice
5	M	24	0.67	0.34	0.02	4	1580	730	1580	NA	no advice
6	W	30	0.8	0.4	0	4	2500	3050	2300	NA	no advice
7	W	22	0.75	0.25	0	4	1650	2070	NA	NA	no advice
8	W	20	0.8	0.2	0	4	1600	1830	1650	NA	no advice
9	M	23	0.4	0.1	0	4	700	1030	1100	NA	no advice
10	W	20	0.9	0.15	0.1	4	900	3700	1000	NA	no advice
11	M	23	0.4	0.05	0	4	800	670	750	NA	no advice
12	M	24	0.05	0	0	4	1200	810	1200	NA	no advice
13	M	23	0.6	0.3	0.1	4	2500	2440	2500	NA	no advice
14	W	22	0.9	0.2	0	4	1500	2440	1200	NA	no advice
15	W	24	0.75	0.45	0.05	4	1500	2410	1100	NA	no advice
16	W	26	0.5	0.1	0	4	2000	2190	2200	NA	no advice
17	M	22	0.5	0.1	0	4	2000	1220	1900	NA	no advice
18	M	26	0.65	0.4	0.15	4	650	910	650	NA	no advice
19	W	27	0.9	0.1	0.2	4	980	1200	1000	NA	no advice
20	W	23	0.7	0.05	0	4	850	1280	870	NA	no advice
21	W	23	0.8	0.2	0	4	1600	1580	1600	NA	no advice
22	W	20	0.7	0	0	4	16000	3700	16000	NA	no advice
23	M	21	0.7	0.2	0	4	1500	1700	1500	NA	no advice
24	M	23	0.75	0.15	0.33	4	1200	1090	1100	NA	no advice
25	M	23	0.4	0.05	0.25	4	800	850	800	NA	no advice
26	W	25	0.4	0.1	0.05	4	2600	3050	2500	NA	no advice
27	W	20	0.85	0.1	0	4	1300	1090	1400	NA	no advice
28	M	21	0.8	0.3	0.5	4	800	480	750	NA	no advice
29	M	31	0.4	0	0.2	4	3000	6510	2400	NA	no advice
1	M	25	0.7	0.35	0	5	400	1830	370	NA	no advice
2	M	29	0.3	0.1	0	5	340	1080	310	NA	no advice
3	M	23	0.35	0.15	0.25	5	NA	1220	NA	NA	no advice
4	W	25	0.8	0.1	0	5	2000	3410	2000	NA	no advice
5	M	24	0.67	0.34	0.02	5	456	730	450	NA	no advice
6	W	30	0.8	0.4	0	5	300	3050	350	NA	no advice
7	W	22	0.75	0.25	0	5	600	2070	NA	NA	no advice
8	W	20	0.8	0.2	0	5	600	1830	500	NA	no advice
9	M	23	0.4	0.1	0	5	400	1030	450	NA	no advice
10	W	20	0.9	0.15	0.1	5	700	3700	500	NA	no advice
11	M	23	0.4	0.05	0	5	400	670	400	NA	no advice
12	M	24	0.05	0	0	5	270	810	270	NA	no advice
13	M	23	0.6	0.3	0.1	5	2500	2440	2500	NA	no advice
14	W	22	0.9	0.2	0	5	500	2440	600	NA	no advice
15	W	24	0.75	0.45	0.05	5	600	2410	550	NA	no advice
16	W	26	0.5	0.1	0	5	800	2190	1200	NA	no advice
17	M	22	0.5	0.1	0	5	900	1220	800	NA	no advice
18	M	26	0.65	0.4	0.15	5	200	910	250	NA	no advice
19	W	27	0.9	0.1	0.2	5	520	1200	520	NA	no advice
20	W	23	0.7	0.05	0	5	350	1280	330	NA	no advice
21	W	23	0.8	0.2	0	5	200	1580	250	NA	no advice
22	W	20	0.7	0	0	5	1200	3700	1000	NA	no advice
23	M	21	0.7	0.2	0	5	500	1700	500	NA	no advice
24	M	23	0.75	0.15	0.33	5	350	1090	350	NA	no advice
25	M	23	0.4	0.05	0.25	5	NA	850	NA	NA	no advice
26	W	25	0.4	0.1	0.05	5	700	3050	680	NA	no advice
27	W	20	0.85	0.1	0	5	550	1090	550	NA	no advice
28	M	21	0.8	0.3	0.5	5	200	480	300	NA	no advice
29	M	31	0.4	0	0.2	5	1900	6510	2100	NA	no advice
1	M	25	0.7	0.35	0	6	530	630	530	20	somewhat competent
2	M	29	0.3	0.1	0	6	420	500	420	20	somewhat competent
3	M	23	0.35	0.15	0.25	6	400	480	400	20	somewhat competent
4	W	25	0.8	0.1	0	6	1000	1200	1000	20	somewhat competent
5	M	24	0.67	0.34	0.02	6	878	1050	870	20	somewhat competent
6	W	30	0.8	0.4	0	6	1200	1440	1200	20	somewhat competent
7	W	22	0.75	0.25	0	6	450	540	NA	20	somewhat competent
8	W	20	0.8	0.2	0	6	600	720	620	20	somewhat competent
9	M	23	0.4	0.1	0	6	400	480	450	20	somewhat competent
10	W	20	0.9	0.15	0.1	6	700	840	830	20	somewhat competent
11	M	23	0.4	0.05	0	6	500	600	500	20	somewhat competent
12	M	24	0.05	0	0	6	1000	1200	1000	20	somewhat competent
13	M	23	0.6	0.3	0.1	6	1000	1200	1000	20	somewhat competent
14	W	22	0.9	0.2	0	6	300	360	300	20	somewhat competent
15	W	24	0.75	0.45	0.05	6	980	1170	980	20	somewhat competent
16	W	26	0.5	0.1	0	6	500	600	550	20	somewhat competent
17	M	22	0.5	0.1	0	6	700	840	720	20	somewhat competent
18	M	26	0.65	0.4	0.15	6	560	670	580	20	somewhat competent
19	W	27	0.9	0.1	0.2	6	390	460	400	20	somewhat competent
20	W	23	0.7	0.05	0	6	470	560	470	20	somewhat competent
21	W	23	0.8	0.2	0	6	400	480	550	20	somewhat competent
22	W	20	0.7	0	0	6	1200	1440	1200	20	somewhat competent
23	M	21	0.7	0.2	0	6	600	720	600	20	somewhat competent
24	M	23	0.75	0.15	0.33	6	600	720	600	20	somewhat competent
25	M	23	0.4	0.05	0.25	6	300	360	300	20	somewhat competent
26	W	25	0.4	0.1	0.05	6	650	780	600	20	somewhat competent
27	W	20	0.85	0.1	0	6	600	720	600	20	somewhat competent
28	M	21	0.8	0.3	0.5	6	500	600	400	20	somewhat competent
29	M	31	0.4	0	0.2	6	1200	1440	NA	20	somewhat competent
1	M	25	0.7	0.35	0	7	400	500	400	26	random number
2	M	29	0.3	0.1	0	7	340	420	350	26	random number
3	M	23	0.35	0.15	0.25	7	240	300	260	26	random number
4	W	25	0.8	0.1	0	7	500	630	500	26	random number
5	M	24	0.67	0.34	0.02	7	245	300	250	26	random number
6	W	30	0.8	0.4	0	7	700	880	780	26	random number
7	W	22	0.75	0.25	0	7	700	880	NA	26	random number
8	W	20	0.8	0.2	0	7	300	370	300	26	random number
9	M	23	0.4	0.1	0	7	380	470	440	26	random number
10	W	20	0.9	0.15	0.1	7	200	250	200	26	random number
11	M	23	0.4	0.05	0	7	300	370	300	26	random number
12	M	24	0.05	0	0	7	450	560	500	26	random number
13	M	23	0.6	0.3	0.1	7	2000	2520	2000	26	random number
14	W	22	0.9	0.2	0	7	200	250	200	26	random number
15	W	24	0.75	0.45	0.05	7	350	440	390	26	random number
16	W	26	0.5	0.1	0	7	700	880	760	26	random number
17	M	22	0.5	0.1	0	7	400	500	400	26	random number
18	M	26	0.65	0.4	0.15	7	NA	220	NA	26	random number
19	W	27	0.9	0.1	0.2	7	380	470	380	26	random number
20	W	23	0.7	0.05	0	7	NA	160	NA	26	random number
21	W	23	0.8	0.2	0	7	250	310	270	26	random number
22	W	20	0.7	0	0	7	1000	1260	1000	26	random number
23	M	21	0.7	0.2	0	7	400	500	400	26	random number
24	M	23	0.75	0.15	0.33	7	250	310	250	26	random number
25	M	23	0.4	0.05	0.25	7	NA	180	NA	26	random number
26	W	25	0.4	0.1	0.05	7	300	370	300	26	random number
27	W	20	0.85	0.1	0	7	300	370	300	26	random number
28	M	21	0.8	0.3	0.5	7	200	250	200	26	random number
29	M	31	0.4	0	0.2	7	1000	1260	1200	26	random number
1	M	25	0.7	0.35	0	8	NA	500	NA	NA	no advice
2	M	29	0.3	0.1	0	8	230	420	230	NA	no advice
3	M	23	0.35	0.15	0.25	8	NA	300	NA	NA	no advice
4	W	25	0.8	0.1	0	8	1200	630	1200	NA	no advice
5	M	24	0.67	0.34	0.02	8	670	300	670	NA	no advice
6	W	30	0.8	0.4	0	8	500	880	450	NA	no advice
7	W	22	0.75	0.25	0	8	1100	880	NA	NA	no advice
8	W	20	0.8	0.2	0	8	200	370	200	NA	no advice
9	M	23	0.4	0.1	0	8	800	470	800	NA	no advice
10	W	20	0.9	0.15	0.1	8	600	250	550	NA	no advice
11	M	23	0.4	0.05	0	8	250	370	250	NA	no advice
12	M	24	0.05	0	0	8	360	560	360	NA	no advice
13	M	23	0.6	0.3	0.1	8	2000	2520	1500	NA	no advice
14	W	22	0.9	0.2	0	8	300	250	250	NA	no advice
15	W	24	0.75	0.45	0.05	8	250	440	250	NA	no advice
16	W	26	0.5	0.1	0	8	300	880	400	NA	no advice
17	M	22	0.5	0.1	0	8	600	500	600	NA	no advice
18	M	26	0.65	0.4	0.15	8	350	220	380	NA	no advice
19	W	27	0.9	0.1	0.2	8	640	470	640	NA	no advice
20	W	23	0.7	0.05	0	8	450	160	470	NA	no advice
21	W	23	0.8	0.2	0	8	500	310	550	NA	no advice
22	W	20	0.7	0	0	8	1500	1260	1500	NA	no advice
23	M	21	0.7	0.2	0	8	400	500	400	NA	no advice
24	M	23	0.75	0.15	0.33	8	400	310	400	NA	no advice
25	M	23	0.4	0.05	0.25	8	NA	180	NA	NA	no advice
26	W	25	0.4	0.1	0.05	8	350	370	350	NA	no advice
27	W	20	0.85	0.1	0	8	400	370	400	NA	no advice
28	M	21	0.8	0.3	0.5	8	300	250	300	NA	no advice
29	M	31	0.4	0	0.2	8	1200	1260	1300	NA	no advice
1	M	25	0.7	0.35	0	9	2100	1720	2100	-18	random number
2	M	29	0.3	0.1	0	9	1800	1470	1800	-18	random number
3	M	23	0.35	0.15	0.25	9	1750	1430	1750	-18	random number
4	W	25	0.8	0.1	0	9	3500	2870	3300	-18	random number
5	M	24	0.67	0.34	0.02	9	878	710	876	-18	random number
6	W	30	0.8	0.4	0	9	2500	2050	2300	-18	random number
7	W	22	0.75	0.25	0	9	3400	2780	NA	-18	random number
8	W	20	0.8	0.2	0	9	1500	1230	1500	-18	random number
9	M	23	0.4	0.1	0	9	2500	2050	2100	-18	random number
10	W	20	0.9	0.15	0.1	9	1300	1060	1300	-18	random number
11	M	23	0.4	0.05	0	9	980	800	950	-18	random number
12	M	24	0.05	0	0	9	2000	1640	1640	-18	random number
13	M	23	0.6	0.3	0.1	9	4500	3690	4500	-18	random number
14	W	22	0.9	0.2	0	9	1500	1230	1400	-18	random number
15	W	24	0.75	0.45	0.05	9	1900	1550	1900	-18	random number
16	W	26	0.5	0.1	0	9	1750	1430	1750	-18	random number
17	M	22	0.5	0.1	0	9	2000	1640	2000	-18	random number
18	M	26	0.65	0.4	0.15	9	1890	1540	1790	-18	random number
19	W	27	0.9	0.1	0.2	9	1300	1060	1300	-18	random number
20	W	23	0.7	0.05	0	9	1300	1060	1300	-18	random number
21	W	23	0.8	0.2	0	9	3500	2870	3500	-18	random number
22	W	20	0.7	0	0	9	19000	2000	15000	-18	random number
23	M	21	0.7	0.2	0	9	2500	2050	2300	-18	random number
24	M	23	0.75	0.15	0.33	9	1900	1550	1750	-18	random number
25	M	23	0.4	0.05	0.25	9	1800	1470	1800	-18	random number
26	W	25	0.4	0.1	0.05	9	3800	3110	3500	-18	random number
27	W	20	0.85	0.1	0	9	500	410	600	-18	random number
28	M	21	0.8	0.3	0.5	9	2500	2050	2400	-18	random number
29	M	31	0.4	0	0.2	9	4400	3600	3900	-18	random number
1	M	25	0.7	0.35	0	10	1550	1920	1650	24	somewhat competent
2	M	29	0.3	0.1	0	10	1950	2410	2100	24	somewhat competent
3	M	23	0.35	0.15	0.25	10	850	1050	950	24	somewhat competent
4	W	25	0.8	0.1	0	10	4000	4960	4000	24	somewhat competent
5	M	24	0.67	0.34	0.02	10	1300	1610	1200	24	somewhat competent
6	W	30	0.8	0.4	0	10	3000	3720	3200	24	somewhat competent
7	W	22	0.75	0.25	0	10	950	1170	NA	24	somewhat competent
8	W	20	0.8	0.2	0	10	1000	1240	1200	24	somewhat competent
9	M	23	0.4	0.1	0	10	1700	2100	1750	24	somewhat competent
10	W	20	0.9	0.15	0.1	10	3250	4030	3250	24	somewhat competent
11	M	23	0.4	0.05	0	10	550	680	580	24	somewhat competent
12	M	24	0.05	0	0	10	1900	2350	1900	24	somewhat competent
13	M	23	0.6	0.3	0.1	10	3000	3720	3200	24	somewhat competent
14	W	22	0.9	0.2	0	10	500	620	800	24	somewhat competent
15	W	24	0.75	0.45	0.05	10	2200	2720	2200	24	somewhat competent
16	W	26	0.5	0.1	0	10	1000	1240	1350	24	somewhat competent
17	M	22	0.5	0.1	0	10	800	990	820	24	somewhat competent
18	M	26	0.65	0.4	0.15	10	1800	2230	1900	24	somewhat competent
19	W	27	0.9	0.1	0.2	10	860	1060	860	24	somewhat competent
20	W	23	0.7	0.05	0	10	930	1150	930	24	somewhat competent
21	W	23	0.8	0.2	0	10	1900	2350	1900	24	somewhat competent
22	W	20	0.7	0	0	10	12000	900	12000	24	somewhat competent
23	M	21	0.7	0.2	0	10	2000	2480	2000	24	somewhat competent
24	M	23	0.75	0.15	0.33	10	950	1170	1000	24	somewhat competent
25	M	23	0.4	0.05	0.25	10	2000	2480	2000	24	somewhat competent
26	W	25	0.4	0.1	0.05	10	2600	3220	2600	24	somewhat competent
27	W	20	0.85	0.1	0	10	300	370	300	24	somewhat competent
28	M	21	0.8	0.3	0.5	10	1000	1240	1500	24	somewhat competent
29	M	31	0.4	0	0.2	10	2200	2720	2300	24	somewhat competent
1	M	25	0.7	0.35	0	11	400	320	400	-20	random number
2	M	29	0.3	0.1	0	11	650	520	620	-20	random number
3	M	23	0.35	0.15	0.25	11	210	160	NA	-20	random number
4	W	25	0.8	0.1	0	11	1500	1200	1400	-20	random number
5	M	24	0.67	0.34	0.02	11	1040	830	1000	-20	random number
6	W	30	0.8	0.4	0	11	700	560	700	-20	random number
7	W	22	0.75	0.25	0	11	250	200	NA	-20	random number
8	W	20	0.8	0.2	0	11	500	400	500	-20	random number
9	M	23	0.4	0.1	0	11	500	400	450	-20	random number
10	W	20	0.9	0.15	0.1	11	200	160	200	-20	random number
11	M	23	0.4	0.05	0	11	300	240	300	-20	random number
12	M	24	0.05	0	0	11	400	320	350	-20	random number
13	M	23	0.6	0.3	0.1	11	4000	3200	4000	-20	random number
14	W	22	0.9	0.2	0	11	400	320	350	-20	random number
15	W	24	0.75	0.45	0.05	11	350	280	350	-20	random number
16	W	26	0.5	0.1	0	11	400	320	400	-20	random number
17	M	22	0.5	0.1	0	11	1200	960	1200	-20	random number
18	M	26	0.65	0.4	0.15	11	340	270	320	-20	random number
19	W	27	0.9	0.1	0.2	11	390	310	390	-20	random number
20	W	23	0.7	0.05	0	11	200	160	200	-20	random number
21	W	23	0.8	0.2	0	11	750	600	750	-20	random number
22	W	20	0.7	0	0	11	2000	1600	2000	-20	random number
23	M	21	0.7	0.2	0	11	400	320	390	-20	random number
24	M	23	0.75	0.15	0.33	11	400	320	400	-20	random number
25	M	23	0.4	0.05	0.25	11	400	320	400	-20	random number
26	W	25	0.4	0.1	0.05	11	800	640	750	-20	random number
27	W	20	0.85	0.1	0	11	300	240	500	-20	random number
28	M	21	0.8	0.3	0.5	11	500	400	500	-20	random number
29	M	31	0.4	0	0.2	11	2300	1840	1900	-20	random number
1	M	25	0.7	0.35	0	12	230	290	230	28	somewhat competent
2	M	29	0.3	0.1	0	12	490	620	500	28	somewhat competent
3	M	23	0.35	0.15	0.25	12	380	480	440	28	somewhat competent
4	W	25	0.8	0.1	0	12	2000	2560	2100	28	somewhat competent
5	M	24	0.67	0.34	0.02	12	560	710	568	28	somewhat competent
6	W	30	0.8	0.4	0	12	1100	1400	1100	28	somewhat competent
7	W	22	0.75	0.25	0	12	2000	2560	NA	28	somewhat competent
8	W	20	0.8	0.2	0	12	500	640	550	28	somewhat competent
9	M	23	0.4	0.1	0	12	600	760	640	28	somewhat competent
10	W	20	0.9	0.15	0.1	12	600	760	600	28	somewhat competent
11	M	23	0.4	0.05	0	12	400	510	450	28	somewhat competent
12	M	24	0.05	0	0	12	420	530	420	28	somewhat competent
13	M	23	0.6	0.3	0.1	12	2000	2560	2200	28	somewhat competent
14	W	22	0.9	0.2	0	12	700	890	700	28	somewhat competent
15	W	24	0.75	0.45	0.05	12	440	560	450	28	somewhat competent
16	W	26	0.5	0.1	0	12	450	570	500	28	somewhat competent
17	M	22	0.5	0.1	0	12	900	1150	930	28	somewhat competent
18	M	26	0.65	0.4	0.15	12	1000	1280	1100	28	somewhat competent
19	W	27	0.9	0.1	0.2	12	770	980	770	28	somewhat competent
20	W	23	0.7	0.05	0	12	850	1080	850	28	somewhat competent
21	W	23	0.8	0.2	0	12	1100	1400	1100	28	somewhat competent
22	W	20	0.7	0	0	12	1500	1920	1500	28	somewhat competent
23	M	21	0.7	0.2	0	12	1500	1920	1500	28	somewhat competent
24	M	23	0.75	0.15	0.33	12	800	1020	800	28	somewhat competent
25	M	23	0.4	0.05	0.25	12	500	640	500	28	somewhat competent
26	W	25	0.4	0.1	0.05	12	1050	1340	1050	28	somewhat competent
27	W	20	0.85	0.1	0	12	400	510	400	28	somewhat competent
28	M	21	0.8	0.3	0.5	12	1000	1280	1000	28	somewhat competent
29	M	31	0.4	0	0.2	12	2200	2810	2300	28	somewhat competent
1	M	25	0.7	0.35	0	13	200	260	230	30	competent
2	M	29	0.3	0.1	0	13	450	580	550	30	competent
3	M	23	0.35	0.15	0.25	13	220	280	260	30	competent
4	W	25	0.8	0.1	0	13	2000	2600	2500	30	competent
5	M	24	0.67	0.34	0.02	13	250	320	268	30	competent
6	W	30	0.8	0.4	0	13	700	910	800	30	competent
7	W	22	0.75	0.25	0	13	1800	2340	2100	30	competent
8	W	20	0.8	0.2	0	13	200	260	240	30	competent
9	M	23	0.4	0.1	0	13	300	390	350	30	competent
10	W	20	0.9	0.15	0.1	13	400	520	500	30	competent
11	M	23	0.4	0.05	0	13	350	450	400	30	competent
12	M	24	0.05	0	0	13	290	370	320	30	competent
13	M	23	0.6	0.3	0.1	13	500	650	600	30	competent
14	W	22	0.9	0.2	0	13	200	260	250	30	competent
15	W	24	0.75	0.45	0.05	13	310	400	370	30	competent
16	W	26	0.5	0.1	0	13	300	390	380	30	competent
17	M	22	0.5	0.1	0	13	450	580	610	30	competent
18	M	26	0.65	0.4	0.15	13	500	650	550	30	competent
19	W	27	0.9	0.1	0.2	13	310	400	390	30	competent
20	W	23	0.7	0.05	0	13	600	780	650	30	competent
21	W	23	0.8	0.2	0	13	300	390	330	30	competent
22	W	20	0.7	0	0	13	1000	1300	1300	30	competent
23	M	21	0.7	0.2	0	13	500	650	600	30	competent
24	M	23	0.75	0.15	0.33	13	450	580	525	30	competent
25	M	23	0.4	0.05	0.25	13	250	320	270	30	competent
26	W	25	0.4	0.1	0.05	13	550	710	650	30	competent
27	W	20	0.85	0.1	0	13	250	320	310	30	competent
28	M	21	0.8	0.3	0.5	13	500	650	550	30	competent
29	M	31	0.4	0	0.2	13	400	520	400	30	competent
1	M	25	0.7	0.35	0	14	2640	3690	2800	40	somewhat competent
2	M	29	0.3	0.1	0	14	3150	4410	3400	40	somewhat competent
3	M	23	0.35	0.15	0.25	14	1750	2450	1950	40	somewhat competent
4	W	25	0.8	0.1	0	14	6000	1700	5800	40	somewhat competent
5	M	24	0.67	0.34	0.02	14	457	630	700	40	somewhat competent
6	W	30	0.8	0.4	0	14	4500	6300	5000	40	somewhat competent
7	W	22	0.75	0.25	0	14	2200	3080	2600	40	somewhat competent
8	W	20	0.8	0.2	0	14	300	420	3000	40	somewhat competent
9	M	23	0.4	0.1	0	14	2600	3630	3200	40	somewhat competent
10	W	20	0.9	0.15	0.1	14	4000	5600	4300	40	somewhat competent
11	M	23	0.4	0.05	0	14	600	840	660	40	somewhat competent
12	M	24	0.05	0	0	14	2600	3630	2800	40	somewhat competent
13	M	23	0.6	0.3	0.1	14	2000	2800	2300	40	somewhat competent
14	W	22	0.9	0.2	0	14	2000	2800	2000	40	somewhat competent
15	W	24	0.75	0.45	0.05	14	3100	4340	3600	40	somewhat competent
16	W	26	0.5	0.1	0	14	3000	4200	3500	40	somewhat competent
17	M	22	0.5	0.1	0	14	400	560	420	40	somewhat competent
18	M	26	0.65	0.4	0.15	14	1750	2450	1900	40	somewhat competent
19	W	27	0.9	0.1	0.2	14	1210	1690	1300	40	somewhat competent
20	W	23	0.7	0.05	0	14	1400	1950	1500	40	somewhat competent
21	W	23	0.8	0.2	0	14	3500	4900	3500	40	somewhat competent
22	W	20	0.7	0	0	14	6000	1400	6000	40	somewhat competent
23	M	21	0.7	0.2	0	14	3000	4200	3000	40	somewhat competent
24	M	23	0.75	0.15	0.33	14	2500	3500	2750	40	somewhat competent
25	M	23	0.4	0.05	0.25	14	2850	3980	3100	40	somewhat competent
26	W	25	0.4	0.1	0.05	14	6500	1500	6400	40	somewhat competent
27	W	20	0.85	0.1	0	14	700	970	800	40	somewhat competent
28	M	21	0.8	0.3	0.5	14	2500	3500	3000	40	somewhat competent
29	M	31	0.4	0	0.2	14	3900	5460	4500	40	somewhat competent
1	M	25	0.7	0.35	0	15	1880	3690	2080	NA	no advice
2	M	29	0.3	0.1	0	15	2500	4410	2500	NA	no advice
3	M	23	0.35	0.15	0.25	15	1900	2450	1900	NA	no advice
4	W	25	0.8	0.1	0	15	5000	1700	5100	NA	no advice
5	M	24	0.67	0.34	0.02	15	656	630	656	NA	no advice
6	W	30	0.8	0.4	0	15	2500	6300	2700	NA	no advice
7	W	22	0.75	0.25	0	15	2700	3080	NA	NA	no advice
8	W	20	0.8	0.2	0	15	2000	420	2300	NA	no advice
9	M	23	0.4	0.1	0	15	2300	3630	2300	NA	no advice
10	W	20	0.9	0.15	0.1	15	4000	5600	4500	NA	no advice
11	M	23	0.4	0.05	0	15	780	840	760	NA	no advice
12	M	24	0.05	0	0	15	1760	3630	1760	NA	no advice
13	M	23	0.6	0.3	0.1	15	5000	2800	5000	NA	no advice
14	W	22	0.9	0.2	0	15	2000	2800	1500	NA	no advice
15	W	24	0.75	0.45	0.05	15	4100	4340	4100	NA	no advice
16	W	26	0.5	0.1	0	15	1300	4200	1800	NA	no advice
17	M	22	0.5	0.1	0	15	3000	560	3000	NA	no advice
18	M	26	0.65	0.4	0.15	15	1800	2450	1800	NA	no advice
19	W	27	0.9	0.1	0.2	15	860	1690	830	NA	no advice
20	W	23	0.7	0.05	0	15	970	1950	1100	NA	no advice
21	W	23	0.8	0.2	0	15	6000	4900	5500	NA	no advice
22	W	20	0.7	0	0	15	15000	1400	15000	NA	no advice
23	M	21	0.7	0.2	0	15	2000	4200	2100	NA	no advice
24	M	23	0.75	0.15	0.33	15	1400	3500	1200	NA	no advice
25	M	23	0.4	0.05	0.25	15	3000	3980	3000	NA	no advice
26	W	25	0.4	0.1	0.05	15	4000	1500	4000	NA	no advice
27	W	20	0.85	0.1	0	15	1500	970	1500	NA	no advice
28	M	21	0.8	0.3	0.5	15	1800	3500	1850	NA	no advice
29	M	31	0.4	0	0.2	15	5800	5460	5500	NA	no advice
1	M	25	0.7	0.35	0	16	1300	830	1300	-36	random number
2	M	29	0.3	0.1	0	16	1400	890	1400	-36	random number
3	M	23	0.35	0.15	0.25	16	1280	810	1280	-36	random number
4	W	25	0.8	0.1	0	16	3000	1920	2800	-36	random number
5	M	24	0.67	0.34	0.02	16	879	560	870	-36	random number
6	W	30	0.8	0.4	0	16	2000	1280	1900	-36	random number
7	W	22	0.75	0.25	0	16	2300	1470	NA	-36	random number
8	W	20	0.8	0.2	0	16	1600	1020	1600	-36	random number
9	M	23	0.4	0.1	0	16	1900	1210	1600	-36	random number
10	W	20	0.9	0.15	0.1	16	3000	1920	3200	-36	random number
11	M	23	0.4	0.05	0	16	600	380	600	-36	random number
12	M	24	0.05	0	0	16	1400	890	1200	-36	random number
13	M	23	0.6	0.3	0.1	16	3000	1920	3000	-36	random number
14	W	22	0.9	0.2	0	16	2000	1280	1500	-36	random number
15	W	24	0.75	0.45	0.05	16	2900	1850	2900	-36	random number
16	W	26	0.5	0.1	0	16	3000	1920	2800	-36	random number
17	M	22	0.5	0.1	0	16	1500	960	1500	-36	random number
18	M	26	0.65	0.4	0.15	16	1400	890	1000	-36	random number
19	W	27	0.9	0.1	0.2	16	790	500	790	-36	random number
20	W	23	0.7	0.05	0	16	900	570	870	-36	random number
21	W	23	0.8	0.2	0	16	3500	2240	3500	-36	random number
22	W	20	0.7	0	0	16	10000	6400	10000	-36	random number
23	M	21	0.7	0.2	0	16	2000	1280	2000	-36	random number
24	M	23	0.75	0.15	0.33	16	1000	640	1000	-36	random number
25	M	23	0.4	0.05	0.25	16	1800	1150	1800	-36	random number
26	W	25	0.4	0.1	0.05	16	4000	2560	4000	-36	random number
27	W	20	0.85	0.1	0	16	700	440	700	-36	random number
28	M	21	0.8	0.3	0.5	16	1400	890	1100	-36	random number
29	M	31	0.4	0	0.2	16	6500	4160	4600	-36	random number
1	M	25	0.7	0.35	0	17	NA	210	NA	32	competent
2	M	29	0.3	0.1	0	17	700	920	750	32	competent
3	M	23	0.35	0.15	0.25	17	600	790	700	32	competent
4	W	25	0.8	0.1	0	17	1500	1980	1900	32	competent
5	M	24	0.67	0.34	0.02	17	459	600	508	32	competent
6	W	30	0.8	0.4	0	17	1500	1980	1700	32	competent
7	W	22	0.75	0.25	0	17	720	950	820	32	competent
8	W	20	0.8	0.2	0	17	300	390	300	32	competent
9	M	23	0.4	0.1	0	17	380	500	460	32	competent
10	W	20	0.9	0.15	0.1	17	400	520	518	32	competent
11	M	23	0.4	0.05	0	17	250	330	280	32	competent
12	M	24	0.05	0	0	17	310	400	310	32	competent
13	M	23	0.6	0.3	0.1	17	1000	1320	1200	32	competent
14	W	22	0.9	0.2	0	17	300	390	350	32	competent
15	W	24	0.75	0.45	0.05	17	410	540	490	32	competent
16	W	26	0.5	0.1	0	17	1000	1320	1200	32	competent
17	M	22	0.5	0.1	0	17	600	790	700	32	competent
18	M	26	0.65	0.4	0.15	17	750	990	850	32	competent
19	W	27	0.9	0.1	0.2	17	495	650	600	32	competent
20	W	23	0.7	0.05	0	17	760	1000	820	32	competent
21	W	23	0.8	0.2	0	17	600	790	650	32	competent
22	W	20	0.7	0	0	17	8000	2700	3000	32	competent
23	M	21	0.7	0.2	0	17	1000	1320	1000	32	competent
24	M	23	0.75	0.15	0.33	17	800	1050	900	32	competent
25	M	23	0.4	0.05	0.25	17	1100	1450	1100	32	competent
26	W	25	0.4	0.1	0.05	17	2500	3300	2800	32	competent
27	W	20	0.85	0.1	0	17	350	460	420	32	competent
28	M	21	0.8	0.3	0.5	17	500	660	550	32	competent
29	M	31	0.4	0	0.2	17	1500	1980	1776	32	competent
1	M	25	0.7	0.35	0	18	1240	210	1250	NA	no advice
2	M	29	0.3	0.1	0	18	750	920	750	NA	no advice
3	M	23	0.35	0.15	0.25	18	750	790	750	NA	no advice
4	W	25	0.8	0.1	0	18	2000	1980	1500	NA	no advice
5	M	24	0.67	0.34	0.02	18	765	600	699	NA	no advice
6	W	30	0.8	0.4	0	18	2500	1980	2500	NA	no advice
7	W	22	0.75	0.25	0	18	1300	950	1350	NA	no advice
8	W	20	0.8	0.2	0	18	400	390	400	NA	no advice
9	M	23	0.4	0.1	0	18	800	500	800	NA	no advice
10	W	20	0.9	0.15	0.1	18	900	520	860	NA	no advice
11	M	23	0.4	0.05	0	18	450	330	450	NA	no advice
12	M	24	0.05	0	0	18	490	400	490	NA	no advice
13	M	23	0.6	0.3	0.1	18	1500	1320	1500	NA	no advice
14	W	22	0.9	0.2	0	18	700	390	650	NA	no advice
15	W	24	0.75	0.45	0.05	18	850	540	850	NA	no advice
16	W	26	0.5	0.1	0	18	800	1320	1100	NA	no advice
17	M	22	0.5	0.1	0	18	400	790	400	NA	no advice
18	M	26	0.65	0.4	0.15	18	1050	990	1050	NA	no advice
19	W	27	0.9	0.1	0.2	18	615	650	615	NA	no advice
20	W	23	0.7	0.05	0	18	450	1000	430	NA	no advice
21	W	23	0.8	0.2	0	18	700	790	700	NA	no advice
22	W	20	0.7	0	0	18	5000	2700	5000	NA	no advice
23	M	21	0.7	0.2	0	18	1400	1320	1400	NA	no advice
24	M	23	0.75	0.15	0.33	18	750	1050	850	NA	no advice
25	M	23	0.4	0.05	0.25	18	1300	1450	1100	NA	no advice
26	W	25	0.4	0.1	0.05	18	850	3300	850	NA	no advice
27	W	20	0.85	0.1	0	18	300	460	250	NA	no advice
28	M	21	0.8	0.3	0.5	18	800	660	900	NA	no advice
29	M	31	0.4	0	0.2	18	1333	1980	1200	NA	no advice
1	M	25	0.7	0.35	0	19	550	350	450	-36	competent
2	M	29	0.3	0.1	0	19	1600	1020	1300	-36	competent
3	M	23	0.35	0.15	0.25	19	830	530	600	-36	competent
4	W	25	0.8	0.1	0	19	1500	960	1000	-36	competent
5	M	24	0.67	0.34	0.02	19	565	360	408	-36	competent
6	W	30	0.8	0.4	0	19	3000	1920	2600	-36	competent
7	W	22	0.75	0.25	0	19	650	410	610	-36	competent
8	W	20	0.8	0.2	0	19	1600	1020	1400	-36	competent
9	M	23	0.4	0.1	0	19	550	350	430	-36	competent
10	W	20	0.9	0.15	0.1	19	600	380	400	-36	competent
11	M	23	0.4	0.05	0	19	500	320	430	-36	competent
12	M	24	0.05	0	0	19	740	470	740	-36	competent
13	M	23	0.6	0.3	0.1	19	3000	1920	2400	-36	competent
14	W	22	0.9	0.2	0	19	500	320	350	-36	competent
15	W	24	0.75	0.45	0.05	19	1100	700	900	-36	competent
16	W	26	0.5	0.1	0	19	1000	640	800	-36	competent
17	M	22	0.5	0.1	0	19	900	570	630	-36	competent
18	M	26	0.65	0.4	0.15	19	750	480	700	-36	competent
19	W	27	0.9	0.1	0.2	19	325	200	250	-36	competent
20	W	23	0.7	0.05	0	19	950	600	740	-36	competent
21	W	23	0.8	0.2	0	19	450	280	400	-36	competent
22	W	20	0.7	0	0	19	9000	5760	6000	-36	competent
23	M	21	0.7	0.2	0	19	1700	1080	1400	-36	competent
24	M	23	0.75	0.15	0.33	19	800	510	800	-36	competent
25	M	23	0.4	0.05	0.25	19	1000	640	800	-36	competent
26	W	25	0.4	0.1	0.05	19	450	280	350	-36	competent
27	W	20	0.85	0.1	0	19	850	540	600	-36	competent
28	M	21	0.8	0.3	0.5	19	700	440	650	-36	competent
29	M	31	0.4	0	0.2	19	3400	2170	2300	-36	competent
1	M	25	0.7	0.35	0	20	470	350	570	NA	no advice
2	M	29	0.3	0.1	0	20	650	1020	580	NA	no advice
3	M	23	0.35	0.15	0.25	20	380	530	380	NA	no advice
4	W	25	0.8	0.1	0	20	2500	960	2800	NA	no advice
5	M	24	0.67	0.34	0.02	20	565	360	555	NA	no advice
6	W	30	0.8	0.4	0	20	1000	1920	1000	NA	no advice
7	W	22	0.75	0.25	0	20	2050	410	2050	NA	no advice
8	W	20	0.8	0.2	0	20	600	1020	500	NA	no advice
9	M	23	0.4	0.1	0	20	1100	350	1000	NA	no advice
10	W	20	0.9	0.15	0.1	20	600	380	550	NA	no advice
11	M	23	0.4	0.05	0	20	500	320	530	NA	no advice
12	M	24	0.05	0	0	20	640	470	740	NA	no advice
13	M	23	0.6	0.3	0.1	20	1500	1920	1500	NA	no advice
14	W	22	0.9	0.2	0	20	700	320	650	NA	no advice
15	W	24	0.75	0.45	0.05	20	1100	700	1150	NA	no advice
16	W	26	0.5	0.1	0	20	600	640	800	NA	no advice
17	M	22	0.5	0.1	0	20	1000	570	1000	NA	no advice
18	M	26	0.65	0.4	0.15	20	850	480	850	NA	no advice
19	W	27	0.9	0.1	0.2	20	480	200	480	NA	no advice
20	W	23	0.7	0.05	0	20	600	600	580	NA	no advice
21	W	23	0.8	0.2	0	20	800	280	800	NA	no advice
22	W	20	0.7	0	0	20	3000	5760	3000	NA	no advice
23	M	21	0.7	0.2	0	20	1200	1080	1200	NA	no advice
24	M	23	0.75	0.15	0.33	20	999	510	999	NA	no advice
25	M	23	0.4	0.05	0.25	20	500	640	700	NA	no advice
26	W	25	0.4	0.1	0.05	20	750	280	750	NA	no advice
27	W	20	0.85	0.1	0	20	300	540	300	NA	no advice
28	M	21	0.8	0.3	0.5	20	500	440	500	NA	no advice
29	M	31	0.4	0	0.2	20	2900	2170	3300	NA	no advice
1	M	25	0.7	0.35	0	21	600	400	530	-32	somewhat competent
2	M	29	0.3	0.1	0	21	410	270	420	-32	somewhat competent
3	M	23	0.35	0.15	0.25	21	250	160	200	-32	somewhat competent
4	W	25	0.8	0.1	0	21	2200	1490	2200	-32	somewhat competent
5	M	24	0.67	0.34	0.02	21	657	440	699	-32	somewhat competent
6	W	30	0.8	0.4	0	21	1000	670	1000	-32	somewhat competent
7	W	22	0.75	0.25	0	21	820	550	NA	-32	somewhat competent
8	W	20	0.8	0.2	0	21	500	330	400	-32	somewhat competent
9	M	23	0.4	0.1	0	21	1000	670	790	-32	somewhat competent
10	W	20	0.9	0.15	0.1	21	NA	2100	NA	-32	somewhat competent
11	M	23	0.4	0.05	0	21	400	270	380	-32	somewhat competent
12	M	24	0.05	0	0	21	980	660	880	-32	somewhat competent
13	M	23	0.6	0.3	0.1	21	2000	1350	1800	-32	somewhat competent
14	W	22	0.9	0.2	0	21	400	270	350	-32	somewhat competent
15	W	24	0.75	0.45	0.05	21	700	470	650	-32	somewhat competent
16	W	26	0.5	0.1	0	21	1400	950	1250	-32	somewhat competent
17	M	22	0.5	0.1	0	21	1600	1080	1550	-32	somewhat competent
18	M	26	0.65	0.4	0.15	21	280	190	280	-32	somewhat competent
19	W	27	0.9	0.1	0.2	21	495	330	450	-32	somewhat competent
20	W	23	0.7	0.05	0	21	450	300	400	-32	somewhat competent
21	W	23	0.8	0.2	0	21	650	440	650	-32	somewhat competent
22	W	20	0.7	0	0	21	3500	2380	3500	-32	somewhat competent
23	M	21	0.7	0.2	0	21	900	610	850	-32	somewhat competent
24	M	23	0.75	0.15	0.33	21	650	440	650	-32	somewhat competent
25	M	23	0.4	0.05	0.25	21	400	270	400	-32	somewhat competent
26	W	25	0.4	0.1	0.05	21	2700	1830	2600	-32	somewhat competent
27	W	20	0.85	0.1	0	21	200	130	250	-32	somewhat competent
28	M	21	0.8	0.3	0.5	21	250	160	250	-32	somewhat competent
29	M	31	0.4	0	0.2	21	3000	2030	2600	-32	somewhat competent
1	M	25	0.7	0.35	0	22	2100	2640	2330	26	competent
2	M	29	0.3	0.1	0	22	1650	2070	1700	26	competent
3	M	23	0.35	0.15	0.25	22	1450	1820	1700	26	competent
4	W	25	0.8	0.1	0	22	4500	5670	5500	26	competent
5	M	24	0.67	0.34	0.02	22	645	810	710	26	competent
6	W	30	0.8	0.4	0	22	3000	3780	3500	26	competent
7	W	22	0.75	0.25	0	22	2700	3400	3100	26	competent
8	W	20	0.8	0.2	0	22	1800	2260	2000	26	competent
9	M	23	0.4	0.1	0	22	800	1000	950	26	competent
10	W	20	0.9	0.15	0.1	22	1500	1890	1800	26	competent
11	M	23	0.4	0.05	0	22	670	840	700	26	competent
12	M	24	0.05	0	0	22	1100	1380	1200	26	competent
13	M	23	0.6	0.3	0.1	22	4000	5040	4600	26	competent
14	W	22	0.9	0.2	0	22	2000	2520	2500	26	competent
15	W	24	0.75	0.45	0.05	22	2750	3460	3150	26	competent
16	W	26	0.5	0.1	0	22	1800	2260	2000	26	competent
17	M	22	0.5	0.1	0	22	2500	3150	2800	26	competent
18	M	26	0.65	0.4	0.15	22	950	1190	1000	26	competent
19	W	27	0.9	0.1	0.2	22	315	390	330	26	competent
20	W	23	0.7	0.05	0	22	700	880	720	26	competent
21	W	23	0.8	0.2	0	22	5750	7240	6800	26	competent
22	W	20	0.7	0	0	22	5000	6300	6500	26	competent
23	M	21	0.7	0.2	0	22	2000	2520	2400	26	competent
24	M	23	0.75	0.15	0.33	22	1250	1570	1350	26	competent
25	M	23	0.4	0.05	0.25	22	2800	3520	3100	26	competent
26	W	25	0.4	0.1	0.05	22	1900	2390	2100	26	competent
27	W	20	0.85	0.1	0	22	900	1130	1100	26	competent
28	M	21	0.8	0.3	0.5	22	1200	1510	1320	26	competent
29	M	31	0.4	0	0.2	22	4500	5670	5000	26	competent
1	M	25	0.7	0.35	0	23	430	2640	430	NA	no advice
2	M	29	0.3	0.1	0	23	550	2070	550	NA	no advice
3	M	23	0.35	0.15	0.25	23	350	1820	350	NA	no advice
4	W	25	0.8	0.1	0	23	3500	5670	2800	NA	no advice
5	M	24	0.67	0.34	0.02	23	888	810	830	NA	no advice
6	W	30	0.8	0.4	0	23	700	3780	777	NA	no advice
7	W	22	0.75	0.25	0	23	2200	3400	NA	NA	no advice
8	W	20	0.8	0.2	0	23	500	2260	400	NA	no advice
9	M	23	0.4	0.1	0	23	650	1000	650	NA	no advice
10	W	20	0.9	0.15	0.1	23	300	1890	333	NA	no advice
11	M	23	0.4	0.05	0	23	450	840	440	NA	no advice
12	M	24	0.05	0	0	23	930	1380	930	NA	no advice
13	M	23	0.6	0.3	0.1	23	1500	5040	1500	NA	no advice
14	W	22	0.9	0.2	0	23	500	2520	400	NA	no advice
15	W	24	0.75	0.45	0.05	23	450	3460	550	NA	no advice
16	W	26	0.5	0.1	0	23	1200	2260	1000	NA	no advice
17	M	22	0.5	0.1	0	23	1800	3150	1800	NA	no advice
18	M	26	0.65	0.4	0.15	23	700	1190	700	NA	no advice
19	W	27	0.9	0.1	0.2	23	485	390	485	NA	no advice
20	W	23	0.7	0.05	0	23	800	880	760	NA	no advice
21	W	23	0.8	0.2	0	23	800	7240	850	NA	no advice
22	W	20	0.7	0	0	23	5000	6300	5000	NA	no advice
23	M	21	0.7	0.2	0	23	1000	2520	900	NA	no advice
24	M	23	0.75	0.15	0.33	23	900	1570	900	NA	no advice
25	M	23	0.4	0.05	0.25	23	600	3520	500	NA	no advice
26	W	25	0.4	0.1	0.05	23	3100	2390	3100	NA	no advice
27	W	20	0.85	0.1	0	23	350	1130	360	NA	no advice
28	M	21	0.8	0.3	0.5	23	500	1510	480	NA	no advice
29	M	31	0.4	0	0.2	23	4999	5670	3999	NA	no advice
1	M	25	0.7	0.35	0	24	600	2640	620	NA	no advice
2	M	29	0.3	0.1	0	24	750	2070	750	NA	no advice
3	M	23	0.35	0.15	0.25	24	700	1820	700	NA	no advice
4	W	25	0.8	0.1	0	24	1800	5670	2000	NA	no advice
5	M	24	0.67	0.34	0.02	24	467	810	466	NA	no advice
6	W	30	0.8	0.4	0	24	1000	3780	1100	NA	no advice
7	W	22	0.75	0.25	0	24	750	3400	NA	NA	no advice
8	W	20	0.8	0.2	0	24	600	2260	600	NA	no advice
9	M	23	0.4	0.1	0	24	650	1000	650	NA	no advice
10	W	20	0.9	0.15	0.1	24	900	1890	890	NA	no advice
11	M	23	0.4	0.05	0	24	700	840	650	NA	no advice
12	M	24	0.05	0	0	24	640	1380	640	NA	no advice
13	M	23	0.6	0.3	0.1	24	1500	5040	1500	NA	no advice
14	W	22	0.9	0.2	0	24	600	2520	700	NA	no advice
15	W	24	0.75	0.45	0.05	24	1800	3460	1800	NA	no advice
16	W	26	0.5	0.1	0	24	700	2260	650	NA	no advice
17	M	22	0.5	0.1	0	24	1000	3150	1000	NA	no advice
18	M	26	0.65	0.4	0.15	24	800	1190	800	NA	no advice
19	W	27	0.9	0.1	0.2	24	450	390	450	NA	no advice
20	W	23	0.7	0.05	0	24	780	880	750	NA	no advice
21	W	23	0.8	0.2	0	24	1200	7240	1200	NA	no advice
22	W	20	0.7	0	0	24	3500	6300	3500	NA	no advice
23	M	21	0.7	0.2	0	24	1000	2520	800	NA	no advice
24	M	23	0.75	0.15	0.33	24	800	1570	800	NA	no advice
25	M	23	0.4	0.05	0.25	24	600	3520	600	NA	no advice
26	W	25	0.4	0.1	0.05	24	4000	2390	4000	NA	no advice
27	W	20	0.85	0.1	0	24	200	1130	250	NA	no advice
28	M	21	0.8	0.3	0.5	24	700	1510	680	NA	no advice
29	M	31	0.4	0	0.2	24	1000	5670	1200	NA	no advice
1	M	25	0.7	0.35	0	25	470	2640	670	NA	no advice
2	M	29	0.3	0.1	0	25	700	2070	700	NA	no advice
3	M	23	0.35	0.15	0.25	25	660	1820	690	NA	no advice
4	W	25	0.8	0.1	0	25	2000	5670	1800	NA	no advice
5	M	24	0.67	0.34	0.02	25	678	810	750	NA	no advice
6	W	30	0.8	0.4	0	25	2000	3780	2100	NA	no advice
7	W	22	0.75	0.25	0	25	1630	3400	NA	NA	no advice
8	W	20	0.8	0.2	0	25	1000	2260	1000	NA	no advice
9	M	23	0.4	0.1	0	25	400	1000	400	NA	no advice
10	W	20	0.9	0.15	0.1	25	200	1890	200	NA	no advice
11	M	23	0.4	0.05	0	25	400	840	430	NA	no advice
12	M	24	0.05	0	0	25	540	1380	540	NA	no advice
13	M	23	0.6	0.3	0.1	25	2000	5040	2500	NA	no advice
14	W	22	0.9	0.2	0	25	400	2520	450	NA	no advice
15	W	24	0.75	0.45	0.05	25	1100	3460	1005	NA	no advice
16	W	26	0.5	0.1	0	25	600	2260	700	NA	no advice
17	M	22	0.5	0.1	0	25	900	3150	900	NA	no advice
18	M	26	0.65	0.4	0.15	25	650	1190	650	NA	no advice
19	W	27	0.9	0.1	0.2	25	275	390	250	NA	no advice
20	W	23	0.7	0.05	0	25	600	880	650	NA	no advice
21	W	23	0.8	0.2	0	25	450	7240	450	NA	no advice
22	W	20	0.7	0	0	25	1500	6300	1500	NA	no advice
23	M	21	0.7	0.2	0	25	700	2520	700	NA	no advice
24	M	23	0.75	0.15	0.33	25	650	1570	650	NA	no advice
25	M	23	0.4	0.05	0.25	25	800	3520	900	NA	no advice
26	W	25	0.4	0.1	0.05	25	3000	2390	3000	NA	no advice
27	W	20	0.85	0.1	0	25	400	1130	400	NA	no advice
28	M	21	0.8	0.3	0.5	25	680	1510	689	NA	no advice
29	M	31	0.4	0	0.2	25	2200	5670	2500	NA	no advice
1	M	25	0.7	0.35	0	26	2200	1360	2200	-38	random number
2	M	29	0.3	0.1	0	26	2100	1300	2100	-38	random number
3	M	23	0.35	0.15	0.25	26	2230	1380	2230	-38	random number
4	W	25	0.8	0.1	0	26	6000	3720	5500	-38	random number
5	M	24	0.67	0.34	0.02	26	444	270	430	-38	random number
6	W	30	0.8	0.4	0	26	3000	1860	2900	-38	random number
7	W	22	0.75	0.25	0	26	3850	2380	NA	-38	random number
8	W	20	0.8	0.2	0	26	2000	1240	2000	-38	random number
9	M	23	0.4	0.1	0	26	1600	990	1400	-38	random number
10	W	20	0.9	0.15	0.1	26	3000	1860	3250	-38	random number
11	M	23	0.4	0.05	0	26	800	490	800	-38	random number
12	M	24	0.05	0	0	26	1100	680	1600	-38	random number
13	M	23	0.6	0.3	0.1	26	4000	2480	4000	-38	random number
14	W	22	0.9	0.2	0	26	2000	1240	1500	-38	random number
15	W	24	0.75	0.45	0.05	26	3400	2100	3400	-38	random number
16	W	26	0.5	0.1	0	26	1950	1200	1950	-38	random number
17	M	22	0.5	0.1	0	26	3000	1860	3000	-38	random number
18	M	26	0.65	0.4	0.15	26	1400	860	1400	-38	random number
19	W	27	0.9	0.1	0.2	26	999	610	999	-38	random number
20	W	23	0.7	0.05	0	26	800	490	850	-38	random number
21	W	23	0.8	0.2	0	26	8000	4960	8000	-38	random number
22	W	20	0.7	0	0	26	5000	3100	5000	-38	random number
23	M	21	0.7	0.2	0	26	2200	1360	2200	-38	random number
24	M	23	0.75	0.15	0.33	26	2400	1480	2400	-38	random number
25	M	23	0.4	0.05	0.25	26	2700	1670	2500	-38	random number
26	W	25	0.4	0.1	0.05	26	3900	2410	3700	-38	random number
27	W	20	0.85	0.1	0	26	1200	740	1200	-38	random number
28	M	21	0.8	0.3	0.5	26	2500	1550	2487	-38	random number
29	M	31	0.4	0	0.2	26	5500	3410	3800	-38	random number
1	M	25	0.7	0.35	0	27	NA	140	NA	32	somewhat competent
2	M	29	0.3	0.1	0	27	NA	230	NA	32	somewhat competent
3	M	23	0.35	0.15	0.25	27	290	380	290	32	somewhat competent
4	W	25	0.8	0.1	0	27	1200	1580	1300	32	somewhat competent
5	M	24	0.67	0.34	0.02	27	209	270	200	32	somewhat competent
6	W	30	0.8	0.4	0	27	200	260	NA	32	somewhat competent
7	W	22	0.75	0.25	0	27	370	480	NA	32	somewhat competent
8	W	20	0.8	0.2	0	27	NA	190	NA	32	somewhat competent
9	M	23	0.4	0.1	0	27	250	330	290	32	somewhat competent
10	W	20	0.9	0.15	0.1	27	500	660	490	32	somewhat competent
11	M	23	0.4	0.05	0	27	NA	110	NA	32	somewhat competent
12	M	24	0.05	0	0	27	NA	180	NA	32	somewhat competent
13	M	23	0.6	0.3	0.1	27	500	660	550	32	somewhat competent
14	W	22	0.9	0.2	0	27	200	260	300	32	somewhat competent
15	W	24	0.75	0.45	0.05	27	350	460	350	32	somewhat competent
16	W	26	0.5	0.1	0	27	200	260	230	32	somewhat competent
17	M	22	0.5	0.1	0	27	500	660	520	32	somewhat competent
18	M	26	0.65	0.4	0.15	27	NA	150	NA	32	somewhat competent
19	W	27	0.9	0.1	0.2	27	270	350	270	32	somewhat competent
20	W	23	0.7	0.05	0	27	200	260	220	32	somewhat competent
21	W	23	0.8	0.2	0	27	300	390	300	32	somewhat competent
22	W	20	0.7	0	0	27	2000	2640	2000	32	somewhat competent
23	M	21	0.7	0.2	0	27	200	260	200	32	somewhat competent
24	M	23	0.75	0.15	0.33	27	200	260	250	32	somewhat competent
25	M	23	0.4	0.05	0.25	27	NA	3700	NA	32	somewhat competent
26	W	25	0.4	0.1	0.05	27	600	790	600	32	somewhat competent
27	W	20	0.85	0.1	0	27	250	330	250	32	somewhat competent
28	M	21	0.8	0.3	0.5	27	205	270	230	32	somewhat competent
29	M	31	0.4	0	0.2	27	1000	1320	1200	32	somewhat competent
1	M	25	0.7	0.35	0	28	1900	2240	2090	18	competent
2	M	29	0.3	0.1	0	28	850	1000	900	18	competent
3	M	23	0.35	0.15	0.25	28	550	640	600	18	competent
4	W	25	0.8	0.1	0	28	2300	2710	2700	18	competent
5	M	24	0.67	0.34	0.02	28	345	400	345	18	competent
6	W	30	0.8	0.4	0	28	1000	1180	1100	18	competent
7	W	22	0.75	0.25	0	28	1750	2060	1900	18	competent
8	W	20	0.8	0.2	0	28	700	820	750	18	competent
9	M	23	0.4	0.1	0	28	580	680	650	18	competent
10	W	20	0.9	0.15	0.1	28	1700	2000	NA	18	competent
11	M	23	0.4	0.05	0	28	700	820	750	18	competent
12	M	24	0.05	0	0	28	950	1120	950	18	competent
13	M	23	0.6	0.3	0.1	28	2500	2950	2800	18	competent
14	W	22	0.9	0.2	0	28	700	820	800	18	competent
15	W	24	0.75	0.45	0.05	28	1100	1290	1200	18	competent
16	W	26	0.5	0.1	0	28	1200	1410	1300	18	competent
17	M	22	0.5	0.1	0	28	1200	1410	1300	18	competent
18	M	26	0.65	0.4	0.15	28	800	940	890	18	competent
19	W	27	0.9	0.1	0.2	28	595	700	650	18	competent
20	W	23	0.7	0.05	0	28	700	820	740	18	competent
21	W	23	0.8	0.2	0	28	1100	1290	1150	18	competent
22	W	20	0.7	0	0	28	5000	5900	6000	18	competent
23	M	21	0.7	0.2	0	28	1400	1650	1500	18	competent
24	M	23	0.75	0.15	0.33	28	1000	1180	1111	18	competent
25	M	23	0.4	0.05	0.25	28	1100	1290	1200	18	competent
26	W	25	0.4	0.1	0.05	28	2000	2360	2100	18	competent
27	W	20	0.85	0.1	0	28	500	590	500	18	competent
28	M	21	0.8	0.3	0.5	28	800	940	865	18	competent
29	M	31	0.4	0	0.2	28	1900	2240	1999	18	competent
1	M	25	0.7	0.35	0	29	870	2240	870	NA	no advice
2	M	29	0.3	0.1	0	29	1200	1000	1200	NA	no advice
3	M	23	0.35	0.15	0.25	29	1000	640	1000	NA	no advice
4	W	25	0.8	0.1	0	29	3000	2710	2800	NA	no advice
5	M	24	0.67	0.34	0.02	29	488	400	470	NA	no advice
6	W	30	0.8	0.4	0	29	3000	1180	3000	NA	no advice
7	W	22	0.75	0.25	0	29	2100	2060	2150	NA	no advice
8	W	20	0.8	0.2	0	29	2500	820	2500	NA	no advice
9	M	23	0.4	0.1	0	29	1100	680	1100	NA	no advice
10	W	20	0.9	0.15	0.1	29	2400	2000	2400	NA	no advice
11	M	23	0.4	0.05	0	29	500	820	500	NA	no advice
12	M	24	0.05	0	0	29	1200	1120	1200	NA	no advice
13	M	23	0.6	0.3	0.1	29	2000	2950	2000	NA	no advice
14	W	22	0.9	0.2	0	29	2000	820	1500	NA	no advice
15	W	24	0.75	0.45	0.05	29	2000	1290	1800	NA	no advice
16	W	26	0.5	0.1	0	29	2100	1410	2500	NA	no advice
17	M	22	0.5	0.1	0	29	2100	1410	2100	NA	no advice
18	M	26	0.65	0.4	0.15	29	650	940	650	NA	no advice
19	W	27	0.9	0.1	0.2	29	490	700	510	NA	no advice
20	W	23	0.7	0.05	0	29	870	820	870	NA	no advice
21	W	23	0.8	0.2	0	29	1200	1290	1500	NA	no advice
22	W	20	0.7	0	0	29	6000	5900	8000	NA	no advice
23	M	21	0.7	0.2	0	29	1200	1650	1200	NA	no advice
24	M	23	0.75	0.15	0.33	29	1000	1180	1300	NA	no advice
25	M	23	0.4	0.05	0.25	29	1200	1290	1000	NA	no advice
26	W	25	0.4	0.1	0.05	29	3900	2360	3900	NA	no advice
27	W	20	0.85	0.1	0	29	700	590	1200	NA	no advice
28	M	21	0.8	0.3	0.5	29	500	940	664	NA	no advice
29	M	31	0.4	0	0.2	29	5300	2240	5100	NA	no advice
1	M	25	0.7	0.35	0	30	1330	1800	1430	36	random number
2	M	29	0.3	0.1	0	30	1200	1630	1250	36	random number
3	M	23	0.35	0.15	0.25	30	480	650	480	36	random number
4	W	25	0.8	0.1	0	30	5000	6790	5400	36	random number
5	M	24	0.67	0.34	0.02	30	555	750	555	36	random number
6	W	30	0.8	0.4	0	30	1500	2030	1600	36	random number
7	W	22	0.75	0.25	0	30	3400	4620	NA	36	random number
8	W	20	0.8	0.2	0	30	500	670	550	36	random number
9	M	23	0.4	0.1	0	30	1900	2580	2250	36	random number
10	W	20	0.9	0.15	0.1	30	1400	1900	1380	36	random number
11	M	23	0.4	0.05	0	30	620	840	620	36	random number
12	M	24	0.05	0	0	30	1400	1900	1900	36	random number
13	M	23	0.6	0.3	0.1	30	2500	3390	2500	36	random number
14	W	22	0.9	0.2	0	30	1500	2030	200	36	random number
15	W	24	0.75	0.45	0.05	30	2200	2990	2200	36	random number
16	W	26	0.5	0.1	0	30	1600	2170	1750	36	random number
17	M	22	0.5	0.1	0	30	1200	1630	1200	36	random number
18	M	26	0.65	0.4	0.15	30	750	1010	800	36	random number
19	W	27	0.9	0.1	0.2	30	470	630	470	36	random number
20	W	23	0.7	0.05	0	30	700	950	720	36	random number
21	W	23	0.8	0.2	0	30	1500	2030	1500	36	random number
22	W	20	0.7	0	0	30	5000	6790	5000	36	random number
23	M	21	0.7	0.2	0	30	2200	2990	2200	36	random number
24	M	23	0.75	0.15	0.33	30	2000	2710	2000	36	random number
25	M	23	0.4	0.05	0.25	30	2500	3390	2500	36	random number
26	W	25	0.4	0.1	0.05	30	4300	5840	4500	36	random number
27	W	20	0.85	0.1	0	30	300	400	300	36	random number
28	M	21	0.8	0.3	0.5	30	600	810	649	36	random number
29	M	31	0.4	0	0.2	30	3000	4070	3500	36	random number
1	M	25	0.7	0.35	0	31	2560	1800	2360	NA	no advice
2	M	29	0.3	0.1	0	31	1450	1630	1450	NA	no advice
3	M	23	0.35	0.15	0.25	31	1690	650	1690	NA	no advice
4	W	25	0.8	0.1	0	31	4500	6790	6000	NA	no advice
5	M	24	0.67	0.34	0.02	31	NA	750	288	NA	no advice
6	W	30	0.8	0.4	0	31	3500	2030	3500	NA	no advice
7	W	22	0.75	0.25	0	31	4300	4620	NA	NA	no advice
8	W	20	0.8	0.2	0	31	2500	670	2800	NA	no advice
9	M	23	0.4	0.1	0	31	2700	2580	2600	NA	no advice
10	W	20	0.9	0.15	0.1	31	3250	1900	3250	NA	no advice
11	M	23	0.4	0.05	0	31	1100	840	1050	NA	no advice
12	M	24	0.05	0	0	31	1700	1900	1700	NA	no advice
13	M	23	0.6	0.3	0.1	31	4000	3390	4500	NA	no advice
14	W	22	0.9	0.2	0	31	2000	2030	1500	NA	no advice
15	W	24	0.75	0.45	0.05	31	4400	2990	4400	NA	no advice
16	W	26	0.5	0.1	0	31	3200	2170	2900	NA	no advice
17	M	22	0.5	0.1	0	31	3500	1630	3500	NA	no advice
18	M	26	0.65	0.4	0.15	31	850	1010	850	NA	no advice
19	W	27	0.9	0.1	0.2	31	895	630	895	NA	no advice
20	W	23	0.7	0.05	0	31	900	950	940	NA	no advice
21	W	23	0.8	0.2	0	31	7000	2030	7000	NA	no advice
22	W	20	0.7	0	0	31	10000	6790	10000	NA	no advice
23	M	21	0.7	0.2	0	31	2300	2990	2300	NA	no advice
24	M	23	0.75	0.15	0.33	31	1800	2710	1800	NA	no advice
25	M	23	0.4	0.05	0.25	31	2400	3390	2600	NA	no advice
26	W	25	0.4	0.1	0.05	31	4800	5840	4800	NA	no advice
27	W	20	0.85	0.1	0	31	500	400	550	NA	no advice
28	M	21	0.8	0.3	0.5	31	2430	810	2367	NA	no advice
29	M	31	0.4	0	0.2	31	5900	4070	6700	NA	no advice
1	M	25	0.7	0.35	0	32	270	160	210	-38	competent
2	M	29	0.3	0.1	0	32	260	160	250	-38	competent
3	M	23	0.35	0.15	0.25	32	NA	110	NA	-38	competent
4	W	25	0.8	0.1	0	32	1200	740	700	-38	competent
5	M	24	0.67	0.34	0.02	32	488	300	408	-38	competent
6	W	30	0.8	0.4	0	32	700	430	500	-38	competent
7	W	22	0.75	0.25	0	32	760	470	560	-38	competent
8	W	20	0.8	0.2	0	32	300	180	250	-38	competent
9	M	23	0.4	0.1	0	32	500	310	380	-38	competent
10	W	20	0.9	0.15	0.1	32	200	120	NA	-38	competent
11	M	23	0.4	0.05	0	32	NA	1900	450	-38	competent
12	M	24	0.05	0	0	32	350	210	290	-38	competent
13	M	23	0.6	0.3	0.1	32	1500	930	1200	-38	competent
14	W	22	0.9	0.2	0	32	300	180	200	-38	competent
15	W	24	0.75	0.45	0.05	32	600	370	450	-38	competent
16	W	26	0.5	0.1	0	32	NA	700	750	-38	competent
17	M	22	0.5	0.1	0	32	900	550	700	-38	competent
18	M	26	0.65	0.4	0.15	32	250	150	250	-38	competent
19	W	27	0.9	0.1	0.2	32	295	180	230	-38	competent
20	W	23	0.7	0.05	0	32	270	160	220	-38	competent
21	W	23	0.8	0.2	0	32	350	210	300	-38	competent
22	W	20	0.7	0	0	32	1500	930	930	-38	competent
23	M	21	0.7	0.2	0	32	400	240	300	-38	competent
24	M	23	0.75	0.15	0.33	32	350	210	300	-38	competent
25	M	23	0.4	0.05	0.25	32	NA	2700	200	-38	competent
26	W	25	0.4	0.1	0.05	32	350	210	290	-38	competent
27	W	20	0.85	0.1	0	32	250	150	NA	-38	competent
28	M	21	0.8	0.3	0.5	32	288	170	NA	-38	competent
29	M	31	0.4	0	0.2	32	1300	800	899	-38	competent
1	M	25	0.7	0.35	0	33	2690	160	2690	NA	no advice
2	M	29	0.3	0.1	0	33	1500	160	1550	NA	no advice
3	M	23	0.35	0.15	0.25	33	1250	110	1100	NA	no advice
4	W	25	0.8	0.1	0	33	4000	740	3800	NA	no advice
5	M	24	0.67	0.34	0.02	33	500	300	600	NA	no advice
6	W	30	0.8	0.4	0	33	3000	430	3000	NA	no advice
7	W	22	0.75	0.25	0	33	800	470	2200	NA	no advice
8	W	20	0.8	0.2	0	33	1800	180	1800	NA	no advice
9	M	23	0.4	0.1	0	33	980	310	950	NA	no advice
10	W	20	0.9	0.15	0.1	33	805	120	900	NA	no advice
11	M	23	0.4	0.05	0	33	600	1900	610	NA	no advice
12	M	24	0.05	0	0	33	1600	210	1600	NA	no advice
13	M	23	0.6	0.3	0.1	33	5000	930	5500	NA	no advice
14	W	22	0.9	0.2	0	33	2000	180	2000	NA	no advice
15	W	24	0.75	0.45	0.05	33	1800	370	1800	NA	no advice
16	W	26	0.5	0.1	0	33	1400	700	1600	NA	no advice
17	M	22	0.5	0.1	0	33	1000	550	1000	NA	no advice
18	M	26	0.65	0.4	0.15	33	1800	150	1700	NA	no advice
19	W	27	0.9	0.1	0.2	33	220	180	220	NA	no advice
20	W	23	0.7	0.05	0	33	770	160	800	NA	no advice
21	W	23	0.8	0.2	0	33	7000	210	7000	NA	no advice
22	W	20	0.7	0	0	33	7000	930	10000	NA	no advice
23	M	21	0.7	0.2	0	33	2300	240	2300	NA	no advice
24	M	23	0.75	0.15	0.33	33	1000	210	1250	NA	no advice
25	M	23	0.4	0.05	0.25	33	3000	2700	3000	NA	no advice
26	W	25	0.4	0.1	0.05	33	1500	210	1500	NA	no advice
27	W	20	0.85	0.1	0	33	600	150	650	NA	no advice
28	M	21	0.8	0.3	0.5	33	1400	170	1670	NA	no advice
29	M	31	0.4	0	0.2	33	1100	800	1700	NA	no advice
1	M	25	0.7	0.35	0	34	430	270	430	-36	somewhat competent
2	M	29	0.3	0.1	0	34	290	180	280	-36	somewhat competent
3	M	23	0.35	0.15	0.25	34	380	240	300	-36	somewhat competent
4	W	25	0.8	0.1	0	34	1700	1080	1700	-36	somewhat competent
5	M	24	0.67	0.34	0.02	34	344	220	369	-36	somewhat competent
6	W	30	0.8	0.4	0	34	400	250	350	-36	somewhat competent
7	W	22	0.75	0.25	0	34	700	440	650	-36	somewhat competent
8	W	20	0.8	0.2	0	34	300	190	260	-36	somewhat competent
9	M	23	0.4	0.1	0	34	520	330	410	-36	somewhat competent
10	W	20	0.9	0.15	0.1	34	NA	2800	NA	-36	somewhat competent
11	M	23	0.4	0.05	0	34	240	150	200	-36	somewhat competent
12	M	24	0.05	0	0	34	600	380	500	-36	somewhat competent
13	M	23	0.6	0.3	0.1	34	800	510	600	-36	somewhat competent
14	W	22	0.9	0.2	0	34	300	190	250	-36	somewhat competent
15	W	24	0.75	0.45	0.05	34	410	260	390	-36	somewhat competent
16	W	26	0.5	0.1	0	34	300	190	230	-36	somewhat competent
17	M	22	0.5	0.1	0	34	600	380	550	-36	somewhat competent
18	M	26	0.65	0.4	0.15	34	300	190	280	-36	somewhat competent
19	W	27	0.9	0.1	0.2	34	220	140	220	-36	somewhat competent
20	W	23	0.7	0.05	0	34	270	170	270	-36	somewhat competent
21	W	23	0.8	0.2	0	34	350	220	350	-36	somewhat competent
22	W	20	0.7	0	0	34	1500	960	1500	-36	somewhat competent
23	M	21	0.7	0.2	0	34	400	250	350	-36	somewhat competent
24	M	23	0.75	0.15	0.33	34	350	220	300	-36	somewhat competent
25	M	23	0.4	0.05	0.25	34	NA	1100	NA	-36	somewhat competent
26	W	25	0.4	0.1	0.05	34	350	220	350	-36	somewhat competent
27	W	20	0.85	0.1	0	34	250	160	250	-36	somewhat competent
28	M	21	0.8	0.3	0.5	34	305	190	220	-36	somewhat competent
29	M	31	0.4	0	0.2	34	800	510	750	-36	somewhat competent
1	M	25	0.7	0.35	0	35	500	670	510	36	somewhat competent
2	M	29	0.3	0.1	0	35	900	1220	950	36	somewhat competent
3	M	23	0.35	0.15	0.25	35	1000	1350	1100	36	somewhat competent
4	W	25	0.8	0.1	0	35	2500	3390	2700	36	somewhat competent
5	M	24	0.67	0.34	0.02	35	878	1190	870	36	somewhat competent
6	W	30	0.8	0.4	0	35	1100	1490	1111	36	somewhat competent
7	W	22	0.75	0.25	0	35	1300	1760	1600	36	somewhat competent
8	W	20	0.8	0.2	0	35	1500	2030	1600	36	somewhat competent
9	M	23	0.4	0.1	0	35	840	1140	850	36	somewhat competent
10	W	20	0.9	0.15	0.1	35	1200	1630	1170	36	somewhat competent
11	M	23	0.4	0.05	0	35	670	910	800	36	somewhat competent
12	M	24	0.05	0	0	35	700	950	700	36	somewhat competent
13	M	23	0.6	0.3	0.1	35	3000	4070	3300	36	somewhat competent
14	W	22	0.9	0.2	0	35	2000	2710	2500	36	somewhat competent
15	W	24	0.75	0.45	0.05	35	1950	2650	2250	36	somewhat competent
16	W	26	0.5	0.1	0	35	950	1290	1000	36	somewhat competent
17	M	22	0.5	0.1	0	35	1500	2030	1550	36	somewhat competent
18	M	26	0.65	0.4	0.15	35	850	1150	950	36	somewhat competent
19	W	27	0.9	0.1	0.2	35	570	770	670	36	somewhat competent
20	W	23	0.7	0.05	0	35	750	1010	850	36	somewhat competent
21	W	23	0.8	0.2	0	35	800	1080	1200	36	somewhat competent
22	W	20	0.7	0	0	35	2500	3390	2500	36	somewhat competent
23	M	21	0.7	0.2	0	35	2000	2710	2200	36	somewhat competent
24	M	23	0.75	0.15	0.33	35	1500	2030	1500	36	somewhat competent
25	M	23	0.4	0.05	0.25	35	1300	1760	1300	36	somewhat competent
26	W	25	0.4	0.1	0.05	35	3700	5030	3900	36	somewhat competent
27	W	20	0.85	0.1	0	35	300	400	300	36	somewhat competent
28	M	21	0.8	0.3	0.5	35	860	1160	990	36	somewhat competent
29	M	31	0.4	0	0.2	35	2100	2850	2300	36	somewhat competent
1	M	25	0.7	0.35	0	36	1770	1270	1770	-28	somewhat competent
2	M	29	0.3	0.1	0	36	1600	1150	1500	-28	somewhat competent
3	M	23	0.35	0.15	0.25	36	990	710	950	-28	somewhat competent
4	W	25	0.8	0.1	0	36	4200	3020	4200	-28	somewhat competent
5	M	24	0.67	0.34	0.02	36	1200	860	1000	-28	somewhat competent
6	W	30	0.8	0.4	0	36	2000	1440	2000	-28	somewhat competent
7	W	22	0.75	0.25	0	36	2300	1650	NA	-28	somewhat competent
8	W	20	0.8	0.2	0	36	2000	1440	1850	-28	somewhat competent
9	M	23	0.4	0.1	0	36	1200	860	1100	-28	somewhat competent
10	W	20	0.9	0.15	0.1	36	2000	1440	1890	-28	somewhat competent
11	M	23	0.4	0.05	0	36	700	500	710	-28	somewhat competent
12	M	24	0.05	0	0	36	1300	930	1300	-28	somewhat competent
13	M	23	0.6	0.3	0.1	36	4000	2880	3500	-28	somewhat competent
14	W	22	0.9	0.2	0	36	2000	1440	1500	-28	somewhat competent
15	W	24	0.75	0.45	0.05	36	2400	1720	2350	-28	somewhat competent
16	W	26	0.5	0.1	0	36	1800	1290	1750	-28	somewhat competent
17	M	22	0.5	0.1	0	36	2200	1580	2150	-28	somewhat competent
18	M	26	0.65	0.4	0.15	36	800	570	800	-28	somewhat competent
19	W	27	0.9	0.1	0.2	36	310	220	300	-28	somewhat competent
20	W	23	0.7	0.05	0	36	900	640	900	-28	somewhat competent
21	W	23	0.8	0.2	0	36	6500	4680	6500	-28	somewhat competent
22	W	20	0.7	0	0	36	3500	2520	3500	-28	somewhat competent
23	M	21	0.7	0.2	0	36	200	140	2000	-28	somewhat competent
24	M	23	0.75	0.15	0.33	36	2000	1440	2000	-28	somewhat competent
25	M	23	0.4	0.05	0.25	36	2000	1440	2000	-28	somewhat competent
26	W	25	0.4	0.1	0.05	36	3100	2230	3000	-28	somewhat competent
27	W	20	0.85	0.1	0	36	700	500	700	-28	somewhat competent
28	M	21	0.8	0.3	0.5	36	1000	720	987	-28	somewhat competent
29	M	31	0.4	0	0.2	36	3900	2800	3200	-28	somewhat competent
1	M	25	0.7	0.35	0	37	1800	1080	1200	-40	somewhat competent
2	M	29	0.3	0.1	0	37	700	420	700	-40	somewhat competent
3	M	23	0.35	0.15	0.25	37	950	570	950	-40	somewhat competent
4	W	25	0.8	0.1	0	37	2000	1200	1900	-40	somewhat competent
5	M	24	0.67	0.34	0.02	37	700	420	560	-40	somewhat competent
6	W	30	0.8	0.4	0	37	1000	600	900	-40	somewhat competent
7	W	22	0.75	0.25	0	37	860	510	NA	-40	somewhat competent
8	W	20	0.8	0.2	0	37	1500	900	1400	-40	somewhat competent
9	M	23	0.4	0.1	0	37	690	410	590	-40	somewhat competent
10	W	20	0.9	0.15	0.1	37	1800	1080	1800	-40	somewhat competent
11	M	23	0.4	0.05	0	37	650	390	650	-40	somewhat competent
12	M	24	0.05	0	0	37	640	380	640	-40	somewhat competent
13	M	23	0.6	0.3	0.1	37	2500	1500	2300	-40	somewhat competent
14	W	22	0.9	0.2	0	37	1500	900	1000	-40	somewhat competent
15	W	24	0.75	0.45	0.05	37	1850	1110	1750	-40	somewhat competent
16	W	26	0.5	0.1	0	37	700	420	600	-40	somewhat competent
17	M	22	0.5	0.1	0	37	1000	600	950	-40	somewhat competent
18	M	26	0.65	0.4	0.15	37	750	450	700	-40	somewhat competent
19	W	27	0.9	0.1	0.2	37	440	260	440	-40	somewhat competent
20	W	23	0.7	0.05	0	37	670	400	650	-40	somewhat competent
21	W	23	0.8	0.2	0	37	900	540	900	-40	somewhat competent
22	W	20	0.7	0	0	37	1500	900	1500	-40	somewhat competent
23	M	21	0.7	0.2	0	37	1400	840	1400	-40	somewhat competent
24	M	23	0.75	0.15	0.33	37	1100	660	1000	-40	somewhat competent
25	M	23	0.4	0.05	0.25	37	650	390	650	-40	somewhat competent
26	W	25	0.4	0.1	0.05	37	3500	2100	3500	-40	somewhat competent
27	W	20	0.85	0.1	0	37	200	120	200	-40	somewhat competent
28	M	21	0.8	0.3	0.5	37	742	440	750	-40	somewhat competent
29	M	31	0.4	0	0.2	37	1800	1080	1500	-40	somewhat competent
1	M	25	0.7	0.35	0	38	2040	1420	2000	-30	competent
2	M	29	0.3	0.1	0	38	1000	700	950	-30	competent
3	M	23	0.35	0.15	0.25	38	350	240	321	-30	competent
4	W	25	0.8	0.1	0	38	4500	3150	3150	-30	competent
5	M	24	0.67	0.34	0.02	38	456	310	440	-30	competent
6	W	30	0.8	0.4	0	38	1500	1050	1400	-30	competent
7	W	22	0.75	0.25	0	38	320	220	270	-30	competent
8	W	20	0.8	0.2	0	38	1200	840	1000	-30	competent
9	M	23	0.4	0.1	0	38	1200	840	880	-30	competent
10	W	20	0.9	0.15	0.1	38	400	280	300	-30	competent
11	M	23	0.4	0.05	0	38	430	300	400	-30	competent
12	M	24	0.05	0	0	38	1300	900	1100	-30	competent
13	M	23	0.6	0.3	0.1	38	4000	2800	3200	-30	competent
14	W	22	0.9	0.2	0	38	1500	1050	1200	-30	competent
15	W	24	0.75	0.45	0.05	38	1047	730	810	-30	competent
16	W	26	0.5	0.1	0	38	500	350	400	-30	competent
17	M	22	0.5	0.1	0	38	2500	1750	2000	-30	competent
18	M	26	0.65	0.4	0.15	38	930	650	925	-30	competent
19	W	27	0.9	0.1	0.2	38	210	140	NA	-30	competent
20	W	23	0.7	0.05	0	38	670	460	650	-30	competent
21	W	23	0.8	0.2	0	38	1100	770	900	-30	competent
22	W	20	0.7	0	0	38	2500	1750	2000	-30	competent
23	M	21	0.7	0.2	0	38	1500	1050	1500	-30	competent
24	M	23	0.75	0.15	0.33	38	1000	700	850	-30	competent
25	M	23	0.4	0.05	0.25	38	1200	840	1200	-30	competent
26	W	25	0.4	0.1	0.05	38	1500	1050	1250	-30	competent
27	W	20	0.85	0.1	0	38	400	280	300	-30	competent
28	M	21	0.8	0.3	0.5	38	800	560	800	-30	competent
29	M	31	0.4	0	0.2	38	1777	1240	1444	-30	competent
1	M	25	0.7	0.35	0	39	370	250	370	-30	random number
2	M	29	0.3	0.1	0	39	350	240	300	-30	random number
3	M	23	0.35	0.15	0.25	39	650	450	650	-30	random number
4	W	25	0.8	0.1	0	39	2850	1990	2200	-30	random number
5	M	24	0.67	0.34	0.02	39	356	240	346	-30	random number
6	W	30	0.8	0.4	0	39	500	350	400	-30	random number
7	W	22	0.75	0.25	0	39	450	310	400	-30	random number
8	W	20	0.8	0.2	0	39	700	480	700	-30	random number
9	M	23	0.4	0.1	0	39	340	230	290	-30	random number
10	W	20	0.9	0.15	0.1	39	600	420	470	-30	random number
11	M	23	0.4	0.05	0	39	250	170	250	-30	random number
12	M	24	0.05	0	0	39	800	560	750	-30	random number
13	M	23	0.6	0.3	0.1	39	1500	1050	1500	-30	random number
14	W	22	0.9	0.2	0	39	300	210	250	-30	random number
15	W	24	0.75	0.45	0.05	39	350	240	350	-30	random number
16	W	26	0.5	0.1	0	39	400	280	450	-30	random number
17	M	22	0.5	0.1	0	39	1000	700	1000	-30	random number
18	M	26	0.65	0.4	0.15	39	250	170	230	-30	random number
19	W	27	0.9	0.1	0.2	39	NA	130	NA	-30	random number
20	W	23	0.7	0.05	0	39	220	150	250	-30	random number
21	W	23	0.8	0.2	0	39	600	420	600	-30	random number
22	W	20	0.7	0	0	39	2500	1750	2500	-30	random number
23	M	21	0.7	0.2	0	39	400	280	400	-30	random number
24	M	23	0.75	0.15	0.33	39	400	280	400	-30	random number
25	M	23	0.4	0.05	0.25	39	NA	2900	NA	-30	random number
26	W	25	0.4	0.1	0.05	39	550	380	550	-30	random number
27	W	20	0.85	0.1	0	39	300	210	300	-30	random number
28	M	21	0.8	0.3	0.5	39	320	220	300	-30	random number
29	M	31	0.4	0	0.2	39	1500	1050	1330	-30	random number
1	M	25	0.7	0.35	0	40	460	590	460	30	random number
2	M	29	0.3	0.1	0	40	750	970	850	30	random number
3	M	23	0.35	0.15	0.25	40	NA	220	NA	30	random number
4	W	25	0.8	0.1	0	40	1500	1950	1700	30	random number
5	M	24	0.67	0.34	0.02	40	565	730	680	30	random number
6	W	30	0.8	0.4	0	40	2500	3250	2700	30	random number
7	W	22	0.75	0.25	0	40	1800	2340	2340	30	random number
8	W	20	0.8	0.2	0	40	1500	1950	1500	30	random number
9	M	23	0.4	0.1	0	40	820	1060	1060	30	random number
10	W	20	0.9	0.15	0.1	40	400	520	430	30	random number
11	M	23	0.4	0.05	0	40	300	390	300	30	random number
12	M	24	0.05	0	0	40	640	830	750	30	random number
13	M	23	0.6	0.3	0.1	40	1500	1950	1500	30	random number
14	W	22	0.9	0.2	0	40	500	650	550	30	random number
15	W	24	0.75	0.45	0.05	40	1234	1600	1234	30	random number
16	W	26	0.5	0.1	0	40	1200	1560	1350	30	random number
17	M	22	0.5	0.1	0	40	600	780	600	30	random number
18	M	26	0.65	0.4	0.15	40	520	670	570	30	random number
19	W	27	0.9	0.1	0.2	40	430	550	430	30	random number
20	W	23	0.7	0.05	0	40	500	650	500	30	random number
21	W	23	0.8	0.2	0	40	1300	1690	1400	30	random number
22	W	20	0.7	0	0	40	3500	4550	3500	30	random number
23	M	21	0.7	0.2	0	40	1300	1690	1300	30	random number
24	M	23	0.75	0.15	0.33	40	800	1040	800	30	random number
25	M	23	0.4	0.05	0.25	40	700	910	700	30	random number
26	W	25	0.4	0.1	0.05	40	1950	2530	2000	30	random number
27	W	20	0.85	0.1	0	40	500	650	600	30	random number
28	M	21	0.8	0.3	0.5	40	390	500	420	30	random number
29	M	31	0.4	0	0.2	40	2000	2600	2300	30	random number
1	M	25	0.7	0.35	0	41	670	460	670	-30	somewhat competent
2	M	29	0.3	0.1	0	41	700	480	700	-30	somewhat competent
3	M	23	0.35	0.15	0.25	41	880	610	880	-30	somewhat competent
4	W	25	0.8	0.1	0	41	2000	1400	2000	-30	somewhat competent
5	M	24	0.67	0.34	0.02	41	899	620	890	-30	somewhat competent
6	W	30	0.8	0.4	0	41	2000	1400	2000	-30	somewhat competent
7	W	22	0.75	0.25	0	41	1870	1300	NA	-30	somewhat competent
8	W	20	0.8	0.2	0	41	900	630	900	-30	somewhat competent
9	M	23	0.4	0.1	0	41	1000	700	890	-30	somewhat competent
10	W	20	0.9	0.15	0.1	41	800	560	800	-30	somewhat competent
11	M	23	0.4	0.05	0	41	380	260	380	-30	somewhat competent
12	M	24	0.05	0	0	41	1000	700	1000	-30	somewhat competent
13	M	23	0.6	0.3	0.1	41	1000	700	900	-30	somewhat competent
14	W	22	0.9	0.2	0	41	500	350	450	-30	somewhat competent
15	W	24	0.75	0.45	0.05	41	1122	780	1022	-30	somewhat competent
16	W	26	0.5	0.1	0	41	1200	840	1100	-30	somewhat competent
17	M	22	0.5	0.1	0	41	1100	770	1000	-30	somewhat competent
18	M	26	0.65	0.4	0.15	41	750	520	700	-30	somewhat competent
19	W	27	0.9	0.1	0.2	41	620	430	600	-30	somewhat competent
20	W	23	0.7	0.05	0	41	450	310	450	-30	somewhat competent
21	W	23	0.8	0.2	0	41	1650	1150	1650	-30	somewhat competent
22	W	20	0.7	0	0	41	4000	2800	4000	-30	somewhat competent
23	M	21	0.7	0.2	0	41	1300	900	1300	-30	somewhat competent
24	M	23	0.75	0.15	0.33	41	800	560	800	-30	somewhat competent
25	M	23	0.4	0.05	0.25	41	800	560	800	-30	somewhat competent
26	W	25	0.4	0.1	0.05	41	2150	1500	2150	-30	somewhat competent
27	W	20	0.85	0.1	0	41	450	310	450	-30	somewhat competent
28	M	21	0.8	0.3	0.5	41	400	280	380	-30	somewhat competent
29	M	31	0.4	0	0.2	41	1800	1260	NA	-30	somewhat competent
1	M	25	0.7	0.35	0	42	530	670	530	28	random number
2	M	29	0.3	0.1	0	42	750	960	790	28	random number
3	M	23	0.35	0.15	0.25	42	220	280	220	28	random number
4	W	25	0.8	0.1	0	42	1000	1280	1000	28	random number
5	M	24	0.67	0.34	0.02	42	900	1150	900	28	random number
6	W	30	0.8	0.4	0	42	2500	3200	2500	28	random number
7	W	22	0.75	0.25	0	42	1700	2170	2170	28	random number
8	W	20	0.8	0.2	0	42	600	760	600	28	random number
9	M	23	0.4	0.1	0	42	770	980	980	28	random number
10	W	20	0.9	0.15	0.1	42	200	250	NA	28	random number
11	M	23	0.4	0.05	0	42	380	480	380	28	random number
12	M	24	0.05	0	0	42	410	520	450	28	random number
13	M	23	0.6	0.3	0.1	42	800	1020	800	28	random number
14	W	22	0.9	0.2	0	42	400	510	450	28	random number
15	W	24	0.75	0.45	0.05	42	980	1250	950	28	random number
16	W	26	0.5	0.1	0	42	1000	1280	NA	28	random number
17	M	22	0.5	0.1	0	42	600	760	600	28	random number
18	M	26	0.65	0.4	0.15	42	650	830	680	28	random number
19	W	27	0.9	0.1	0.2	42	510	650	510	28	random number
20	W	23	0.7	0.05	0	42	400	510	400	28	random number
21	W	23	0.8	0.2	0	42	1550	1980	1700	28	random number
22	W	20	0.7	0	0	42	2000	2560	2000	28	random number
23	M	21	0.7	0.2	0	42	700	890	700	28	random number
24	M	23	0.75	0.15	0.33	42	700	890	800	28	random number
25	M	23	0.4	0.05	0.25	42	750	960	750	28	random number
26	W	25	0.4	0.1	0.05	42	1800	2300	1800	28	random number
27	W	20	0.85	0.1	0	42	350	440	360	28	random number
28	M	21	0.8	0.3	0.5	42	300	380	300	28	random number
29	M	31	0.4	0	0.2	42	1444	1840	1666	28	random number
1	M	25	0.7	0.35	0	43	1980	2530	2290	28	competent
2	M	29	0.3	0.1	0	43	1450	1850	1650	28	competent
3	M	23	0.35	0.15	0.25	43	1000	1280	1200	28	competent
4	W	25	0.8	0.1	0	43	5050	6460	6410	28	competent
5	M	24	0.67	0.34	0.02	43	690	880	710	28	competent
6	W	30	0.8	0.4	0	43	2500	3200	3000	28	competent
7	W	22	0.75	0.25	0	43	2600	3320	2800	28	competent
8	W	20	0.8	0.2	0	43	2000	2560	2200	28	competent
9	M	23	0.4	0.1	0	43	1000	1280	1170	28	competent
10	W	20	0.9	0.15	0.1	43	2150	2750	2600	28	competent
11	M	23	0.4	0.05	0	43	680	870	710	28	competent
12	M	24	0.05	0	0	43	1300	1660	1400	28	competent
13	M	23	0.6	0.3	0.1	43	4000	5120	4900	28	competent
14	W	22	0.9	0.2	0	43	800	1020	900	28	competent
15	W	24	0.75	0.45	0.05	43	1980	2530	2530	28	competent
16	W	26	0.5	0.1	0	43	1200	1530	1450	28	competent
17	M	22	0.5	0.1	0	43	3000	3840	3420	28	competent
18	M	26	0.65	0.4	0.15	43	750	960	890	28	competent
19	W	27	0.9	0.1	0.2	43	630	800	730	28	competent
20	W	23	0.7	0.05	0	43	800	1020	900	28	competent
21	W	23	0.8	0.2	0	43	6800	2600	2700	28	competent
22	W	20	0.7	0	0	43	6000	2800	4000	28	competent
23	M	21	0.7	0.2	0	43	2200	2810	2400	28	competent
24	M	23	0.75	0.15	0.33	43	1000	1280	1100	28	competent
25	M	23	0.4	0.05	0.25	43	2100	2680	2100	28	competent
26	W	25	0.4	0.1	0.05	43	2200	2810	2500	28	competent
27	W	20	0.85	0.1	0	43	590	750	780	28	competent
28	M	21	0.8	0.3	0.5	43	1000	1280	1150	28	competent
29	M	31	0.4	0	0.2	43	3333	4260	3999	28	competent
1	M	25	0.7	0.35	0	44	1790	1320	1600	-26	competent
2	M	29	0.3	0.1	0	44	1100	810	1000	-26	competent
3	M	23	0.35	0.15	0.25	44	700	510	650	-26	competent
4	W	25	0.8	0.1	0	44	3000	2220	2200	-26	competent
5	M	24	0.67	0.34	0.02	44	676	500	630	-26	competent
6	W	30	0.8	0.4	0	44	2000	1480	1800	-26	competent
7	W	22	0.75	0.25	0	44	1950	1440	1750	-26	competent
8	W	20	0.8	0.2	0	44	800	590	700	-26	competent
9	M	23	0.4	0.1	0	44	740	540	580	-26	competent
10	W	20	0.9	0.15	0.1	44	1000	740	800	-26	competent
11	M	23	0.4	0.05	0	44	550	400	530	-26	competent
12	M	24	0.05	0	0	44	720	530	720	-26	competent
13	M	23	0.6	0.3	0.1	44	3000	2220	2400	-26	competent
14	W	22	0.9	0.2	0	44	500	370	450	-26	competent
15	W	24	0.75	0.45	0.05	44	1300	960	1005	-26	competent
16	W	26	0.5	0.1	0	44	1000	740	800	-26	competent
17	M	22	0.5	0.1	0	44	2000	1480	1740	-26	competent
18	M	26	0.65	0.4	0.15	44	750	550	650	-26	competent
19	W	27	0.9	0.1	0.2	44	240	170	220	-26	competent
20	W	23	0.7	0.05	0	44	800	590	740	-26	competent
21	W	23	0.8	0.2	0	44	2000	1480	2600	-26	competent
22	W	20	0.7	0	0	44	7000	5180	6000	-26	competent
23	M	21	0.7	0.2	0	44	1243	910	1000	-26	competent
24	M	23	0.75	0.15	0.33	44	750	550	750	-26	competent
25	M	23	0.4	0.05	0.25	44	NA	2800	1000	-26	competent
26	W	25	0.4	0.1	0.05	44	2450	1810	2100	-26	competent
27	W	20	0.85	0.1	0	44	300	220	260	-26	competent
28	M	21	0.8	0.3	0.5	44	900	660	850	-26	competent
29	M	31	0.4	0	0.2	44	3600	2660	2900	-26	competent
1	M	25	0.7	0.35	0	45	NA	2700	NA	-34	competent
2	M	29	0.3	0.1	0	45	500	320	400	-34	competent
3	M	23	0.35	0.15	0.25	45	350	230	230	-34	competent
4	W	25	0.8	0.1	0	45	1700	1120	1150	-34	competent
5	M	24	0.67	0.34	0.02	45	678	440	590	-34	competent
6	W	30	0.8	0.4	0	45	1000	650	1000	-34	competent
7	W	22	0.75	0.25	0	45	1950	1280	NA	-34	competent
8	W	20	0.8	0.2	0	45	500	320	400	-34	competent
9	M	23	0.4	0.1	0	45	590	380	460	-34	competent
10	W	20	0.9	0.15	0.1	45	300	190	200	-34	competent
11	M	23	0.4	0.05	0	45	370	240	370	-34	competent
12	M	24	0.05	0	0	45	400	260	350	-34	competent
13	M	23	0.6	0.3	0.1	45	1000	650	750	-34	competent
14	W	22	0.9	0.2	0	45	400	260	350	-34	competent
15	W	24	0.75	0.45	0.05	45	980	640	755	-34	competent
16	W	26	0.5	0.1	0	45	400	260	300	-34	competent
17	M	22	0.5	0.1	0	45	600	390	500	-34	competent
18	M	26	0.65	0.4	0.15	45	630	410	600	-34	competent
19	W	27	0.9	0.1	0.2	45	420	270	350	-34	competent
20	W	23	0.7	0.05	0	45	600	390	550	-34	competent
21	W	23	0.8	0.2	0	45	1000	650	800	-34	competent
22	W	20	0.7	0	0	45	3500	2300	3000	-34	competent
23	M	21	0.7	0.2	0	45	800	520	700	-34	competent
24	M	23	0.75	0.15	0.33	45	800	520	700	-34	competent
25	M	23	0.4	0.05	0.25	45	900	590	700	-34	competent
26	W	25	0.4	0.1	0.05	45	850	560	700	-34	competent
27	W	20	0.85	0.1	0	45	300	190	200	-34	competent
28	M	21	0.8	0.3	0.5	45	650	420	590	-34	competent
29	M	31	0.4	0	0.2	45	1800	1180	1440	-34	competent
1	M	25	0.7	0.35	0	46	430	2700	330	NA	no advice
2	M	29	0.3	0.1	0	46	1000	320	1000	NA	no advice
3	M	23	0.35	0.15	0.25	46	520	230	520	NA	no advice
4	W	25	0.8	0.1	0	46	2700	1120	3000	NA	no advice
5	M	24	0.67	0.34	0.02	46	799	440	840	NA	no advice
6	W	30	0.8	0.4	0	46	1200	650	1300	NA	no advice
7	W	22	0.75	0.25	0	46	1850	1280	NA	NA	no advice
8	W	20	0.8	0.2	0	46	1000	320	900	NA	no advice
9	M	23	0.4	0.1	0	46	680	380	740	NA	no advice
10	W	20	0.9	0.15	0.1	46	1600	190	1785	NA	no advice
11	M	23	0.4	0.05	0	46	500	240	630	NA	no advice
12	M	24	0.05	0	0	46	760	260	760	NA	no advice
13	M	23	0.6	0.3	0.1	46	1500	650	1500	NA	no advice
14	W	22	0.9	0.2	0	46	700	260	750	NA	no advice
15	W	24	0.75	0.45	0.05	46	850	640	970	NA	no advice
16	W	26	0.5	0.1	0	46	1300	260	NA	NA	no advice
17	M	22	0.5	0.1	0	46	800	390	800	NA	no advice
18	M	26	0.65	0.4	0.15	46	680	410	680	NA	no advice
19	W	27	0.9	0.1	0.2	46	570	270	570	NA	no advice
20	W	23	0.7	0.05	0	46	560	390	580	NA	no advice
21	W	23	0.8	0.2	0	46	600	650	550	NA	no advice
22	W	20	0.7	0	0	46	2500	2300	4000	NA	no advice
23	M	21	0.7	0.2	0	46	1400	520	1400	NA	no advice
24	M	23	0.75	0.15	0.33	46	1200	520	1000	NA	no advice
25	M	23	0.4	0.05	0.25	46	1200	590	1200	NA	no advice
26	W	25	0.4	0.1	0.05	46	1080	560	1080	NA	no advice
27	W	20	0.85	0.1	0	46	250	190	300	NA	no advice
28	M	21	0.8	0.3	0.5	46	400	420	430	NA	no advice
29	M	31	0.4	0	0.2	46	2222	1180	1700	NA	no advice
1	M	25	0.7	0.35	0	47	1450	2700	1450	NA	no advice
2	M	29	0.3	0.1	0	47	1100	320	1100	NA	no advice
3	M	23	0.35	0.15	0.25	47	390	230	390	NA	no advice
4	W	25	0.8	0.1	0	47	2510	1120	2300	NA	no advice
5	M	24	0.67	0.34	0.02	47	456	440	460	NA	no advice
6	W	30	0.8	0.4	0	47	3000	650	3000	NA	no advice
7	W	22	0.75	0.25	0	47	860	1280	NA	NA	no advice
8	W	20	0.8	0.2	0	47	1200	320	1500	NA	no advice
9	M	23	0.4	0.1	0	47	450	380	520	NA	no advice
10	W	20	0.9	0.15	0.1	47	1800	190	1801	NA	no advice
11	M	23	0.4	0.05	0	47	700	240	720	NA	no advice
12	M	24	0.05	0	0	47	1100	260	1300	NA	no advice
13	M	23	0.6	0.3	0.1	47	2500	650	3000	NA	no advice
14	W	22	0.9	0.2	0	47	1000	260	800	NA	no advice
15	W	24	0.75	0.45	0.05	47	1115	640	1115	NA	no advice
16	W	26	0.5	0.1	0	47	750	260	700	NA	no advice
17	M	22	0.5	0.1	0	47	1000	390	1000	NA	no advice
18	M	26	0.65	0.4	0.15	47	850	410	850	NA	no advice
19	W	27	0.9	0.1	0.2	47	250	270	230	NA	no advice
20	W	23	0.7	0.05	0	47	660	390	660	NA	no advice
21	W	23	0.8	0.2	0	47	800	650	800	NA	no advice
22	W	20	0.7	0	0	47	6000	2300	7000	NA	no advice
23	M	21	0.7	0.2	0	47	1400	520	1400	NA	no advice
24	M	23	0.75	0.15	0.33	47	1300	520	1300	NA	no advice
25	M	23	0.4	0.05	0.25	47	1400	590	1500	NA	no advice
26	W	25	0.4	0.1	0.05	47	1050	560	1050	NA	no advice
27	W	20	0.85	0.1	0	47	400	190	400	NA	no advice
28	M	21	0.8	0.3	0.5	47	800	420	800	NA	no advice
29	M	31	0.4	0	0.2	47	2000	1180	1600	NA	no advice
1	M	25	0.7	0.35	0	48	1740	1390	1740	-20	somewhat competent
2	M	29	0.3	0.1	0	48	900	720	900	-20	somewhat competent
3	M	23	0.35	0.15	0.25	48	240	190	220	-20	somewhat competent
4	W	25	0.8	0.1	0	48	2800	2240	2751	-20	somewhat competent
5	M	24	0.67	0.34	0.02	48	210	160	349	-20	somewhat competent
6	W	30	0.8	0.4	0	48	2500	2000	2400	-20	somewhat competent
7	W	22	0.75	0.25	0	48	220	170	NA	-20	somewhat competent
8	W	20	0.8	0.2	0	48	1300	1040	1300	-20	somewhat competent
9	M	23	0.4	0.1	0	48	740	590	750	-20	somewhat competent
10	W	20	0.9	0.15	0.1	48	200	160	240	-20	somewhat competent
11	M	23	0.4	0.05	0	48	630	500	610	-20	somewhat competent
12	M	24	0.05	0	0	48	1100	880	1000	-20	somewhat competent
13	M	23	0.6	0.3	0.1	48	5000	4000	480	-20	somewhat competent
14	W	22	0.9	0.2	0	48	1000	800	900	-20	somewhat competent
15	W	24	0.75	0.45	0.05	48	690	550	650	-20	somewhat competent
16	W	26	0.5	0.1	0	48	500	400	NA	-20	somewhat competent
17	M	22	0.5	0.1	0	48	500	400	480	-20	somewhat competent
18	M	26	0.65	0.4	0.15	48	750	600	630	-20	somewhat competent
19	W	27	0.9	0.1	0.2	48	NA	150	NA	-20	somewhat competent
20	W	23	0.7	0.05	0	48	560	440	570	-20	somewhat competent
21	W	23	0.8	0.2	0	48	800	640	800	-20	somewhat competent
22	W	20	0.7	0	0	48	5000	4000	500	-20	somewhat competent
23	M	21	0.7	0.2	0	48	1400	1120	1400	-20	somewhat competent
24	M	23	0.75	0.15	0.33	48	850	680	850	-20	somewhat competent
25	M	23	0.4	0.05	0.25	48	1000	800	900	-20	somewhat competent
26	W	25	0.4	0.1	0.05	48	720	570	720	-20	somewhat competent
27	W	20	0.85	0.1	0	48	200	160	200	-20	somewhat competent
28	M	21	0.8	0.3	0.5	48	850	680	800	-20	somewhat competent
29	M	31	0.4	0	0.2	48	1400	1120	1400	-20	somewhat competent
1	M	25	0.7	0.35	0	49	440	260	440	-40	random number
2	M	29	0.3	0.1	0	49	450	270	450	-40	random number
3	M	23	0.35	0.15	0.25	49	NA	100	NA	-40	random number
4	W	25	0.8	0.1	0	49	2200	1320	2100	-40	random number
5	M	24	0.67	0.34	0.02	49	234	140	277	-40	random number
6	W	30	0.8	0.4	0	49	700	420	650	-40	random number
7	W	22	0.75	0.25	0	49	750	450	550	-40	random number
8	W	20	0.8	0.2	0	49	400	240	400	-40	random number
9	M	23	0.4	0.1	0	49	900	540	560	-40	random number
10	W	20	0.9	0.15	0.1	49	200	120	NA	-40	random number
11	M	23	0.4	0.05	0	49	350	210	350	-40	random number
12	M	24	0.05	0	0	49	800	480	600	-40	random number
13	M	23	0.6	0.3	0.1	49	1000	600	1000	-40	random number
14	W	22	0.9	0.2	0	49	800	480	700	-40	random number
15	W	24	0.75	0.45	0.05	49	500	300	500	-40	random number
16	W	26	0.5	0.1	0	49	350	210	350	-40	random number
17	M	22	0.5	0.1	0	49	700	420	700	-40	random number
18	M	26	0.65	0.4	0.15	49	580	340	550	-40	random number
19	W	27	0.9	0.1	0.2	49	585	350	550	-40	random number
20	W	23	0.7	0.05	0	49	400	240	390	-40	random number
21	W	23	0.8	0.2	0	49	450	270	450	-40	random number
22	W	20	0.7	0	0	49	1500	900	1500	-40	random number
23	M	21	0.7	0.2	0	49	800	480	800	-40	random number
24	M	23	0.75	0.15	0.33	49	650	390	650	-40	random number
25	M	23	0.4	0.05	0.25	49	200	120	200	-40	random number
26	W	25	0.4	0.1	0.05	49	600	360	600	-40	random number
27	W	20	0.85	0.1	0	49	300	180	310	-40	random number
28	M	21	0.8	0.3	0.5	49	390	230	330	-40	random number
29	M	31	0.4	0	0.2	49	1900	1140	1600	-40	random number
1	M	25	0.7	0.35	0	50	1800	2080	1800	16	random number
2	M	29	0.3	0.1	0	50	1200	1390	1380	16	random number
3	M	23	0.35	0.15	0.25	50	620	710	660	16	random number
4	W	25	0.8	0.1	0	50	4800	5560	5200	16	random number
5	M	24	0.67	0.34	0.02	50	287	330	287	16	random number
6	W	30	0.8	0.4	0	50	2000	2320	2200	16	random number
7	W	22	0.75	0.25	0	50	1100	1270	1270	16	random number
8	W	20	0.8	0.2	0	50	1500	1730	1500	16	random number
9	M	23	0.4	0.1	0	50	570	660	660	16	random number
10	W	20	0.9	0.15	0.1	50	800	920	800	16	random number
11	M	23	0.4	0.05	0	50	700	810	700	16	random number
12	M	24	0.05	0	0	50	1100	1270	1270	16	random number
13	M	23	0.6	0.3	0.1	50	1500	1730	1500	16	random number
14	W	22	0.9	0.2	0	50	800	920	900	16	random number
15	W	24	0.75	0.45	0.05	50	910	1050	910	16	random number
16	W	26	0.5	0.1	0	50	400	460	420	16	random number
17	M	22	0.5	0.1	0	50	900	1040	900	16	random number
18	M	26	0.65	0.4	0.15	50	750	860	800	16	random number
19	W	27	0.9	0.1	0.2	50	280	320	280	16	random number
20	W	23	0.7	0.05	0	50	670	770	700	16	random number
21	W	23	0.8	0.2	0	50	900	1040	900	16	random number
22	W	20	0.7	0	0	50	2000	2320	2000	16	random number
23	M	21	0.7	0.2	0	50	1800	2080	1800	16	random number
24	M	23	0.75	0.15	0.33	50	1200	1390	1300	16	random number
25	M	23	0.4	0.05	0.25	50	1400	1620	1600	16	random number
26	W	25	0.4	0.1	0.05	50	2000	2320	2020	16	random number
27	W	20	0.85	0.1	0	50	300	340	300	16	random number
28	M	21	0.8	0.3	0.5	50	850	980	864	16	random number
29	M	31	0.4	0	0.2	50	1400	1620	1550	16	random number
1	M	25	0.7	0.35	0	51	270	370	330	40	competent
2	M	29	0.3	0.1	0	51	850	1190	1100	40	competent
3	M	23	0.35	0.15	0.25	51	490	680	690	40	competent
4	W	25	0.8	0.1	0	51	2300	3220	3200	40	competent
5	M	24	0.67	0.34	0.02	51	490	680	590	40	competent
6	W	30	0.8	0.4	0	51	2500	3500	3000	40	competent
7	W	22	0.75	0.25	0	51	520	720	650	40	competent
8	W	20	0.8	0.2	0	51	1100	1540	1300	40	competent
9	M	23	0.4	0.1	0	51	380	530	470	40	competent
10	W	20	0.9	0.15	0.1	51	NA	250	200	40	competent
11	M	23	0.4	0.05	0	51	450	630	500	40	competent
12	M	24	0.05	0	0	51	420	580	500	40	competent
13	M	23	0.6	0.3	0.1	51	1500	2100	1900	40	competent
14	W	22	0.9	0.2	0	51	500	700	NA	40	competent
15	W	24	0.75	0.45	0.05	51	530	740	710	40	competent
16	W	26	0.5	0.1	0	51	700	970	850	40	competent
17	M	22	0.5	0.1	0	51	1000	1400	1200	40	competent
18	M	26	0.65	0.4	0.15	51	560	780	650	40	competent
19	W	27	0.9	0.1	0.2	51	240	330	290	40	competent
20	W	23	0.7	0.05	0	51	550	770	650	40	competent
21	W	23	0.8	0.2	0	51	450	630	600	40	competent
22	W	20	0.7	0	0	51	3500	4900	5000	40	competent
23	M	21	0.7	0.2	0	51	1800	2520	1900	40	competent
24	M	23	0.75	0.15	0.33	51	800	1120	1000	40	competent
25	M	23	0.4	0.05	0.25	51	1200	1680	1200	40	competent
26	W	25	0.4	0.1	0.05	51	1600	2240	1800	40	competent
27	W	20	0.85	0.1	0	51	500	700	720	40	competent
28	M	21	0.8	0.3	0.5	51	700	970	810	40	competent
29	M	31	0.4	0	0.2	51	1900	2660	2400	40	competent
1	M	25	0.7	0.35	0	52	2130	2550	2130	20	random number
2	M	29	0.3	0.1	0	52	1500	1800	1700	20	random number
3	M	23	0.35	0.15	0.25	52	1470	1760	1470	20	random number
4	W	25	0.8	0.1	0	52	6000	7200	6800	20	random number
5	M	24	0.67	0.34	0.02	52	435	520	432	20	random number
6	W	30	0.8	0.4	0	52	3000	3600	3400	20	random number
7	W	22	0.75	0.25	0	52	3250	3900	3900	20	random number
8	W	20	0.8	0.2	0	52	2500	3000	2500	20	random number
9	M	23	0.4	0.1	0	52	1400	1680	1680	20	random number
10	W	20	0.9	0.15	0.1	52	3000	3600	3000	20	random number
11	M	23	0.4	0.05	0	52	840	1000	840	20	random number
12	M	24	0.05	0	0	52	1300	1560	1560	20	random number
13	M	23	0.6	0.3	0.1	52	3000	3600	3000	20	random number
14	W	22	0.9	0.2	0	52	1500	1800	1600	20	random number
15	W	24	0.75	0.45	0.05	52	3200	3840	3100	20	random number
16	W	26	0.5	0.1	0	52	1400	1680	1450	20	random number
17	M	22	0.5	0.1	0	52	3000	3600	3000	20	random number
18	M	26	0.65	0.4	0.15	52	800	960	850	20	random number
19	W	27	0.9	0.1	0.2	52	780	930	780	20	random number
20	W	23	0.7	0.05	0	52	1100	1320	1150	20	random number
21	W	23	0.8	0.2	0	52	2000	2400	2200	20	random number
22	W	20	0.7	0	0	52	NA	800	15000	20	random number
23	M	21	0.7	0.2	0	52	2400	2880	2400	20	random number
24	M	23	0.75	0.15	0.33	52	1600	1920	1750	20	random number
25	M	23	0.4	0.05	0.25	52	2200	2640	2200	20	random number
26	W	25	0.4	0.1	0.05	52	4900	5880	5000	20	random number
27	W	20	0.85	0.1	0	52	800	960	850	20	random number
28	M	21	0.8	0.3	0.5	52	1200	1440	1389	20	random number
29	M	31	0.4	0	0.2	52	3900	4680	4444	20	random number
1	M	25	0.7	0.35	0	53	1940	2630	2140	36	competent
2	M	29	0.3	0.1	0	53	700	950	800	36	competent
3	M	23	0.35	0.15	0.25	53	680	920	680	36	competent
4	W	25	0.8	0.1	0	53	3452	4690	4590	36	competent
5	M	24	0.67	0.34	0.02	53	678	920	820	36	competent
6	W	30	0.8	0.4	0	53	1200	1630	1400	36	competent
7	W	22	0.75	0.25	0	53	630	850	730	36	competent
8	W	20	0.8	0.2	0	53	1000	1350	1100	36	competent
9	M	23	0.4	0.1	0	53	500	670	650	36	competent
10	W	20	0.9	0.15	0.1	53	1400	1900	1700	36	competent
11	M	23	0.4	0.05	0	53	520	700	540	36	competent
12	M	24	0.05	0	0	53	800	1080	800	36	competent
13	M	23	0.6	0.3	0.1	53	2500	3390	3100	36	competent
14	W	22	0.9	0.2	0	53	700	950	800	36	competent
15	W	24	0.75	0.45	0.05	53	1500	2030	1900	36	competent
16	W	26	0.5	0.1	0	53	950	1290	1200	36	competent
17	M	22	0.5	0.1	0	53	3000	4070	3535	36	competent
18	M	26	0.65	0.4	0.15	53	650	880	730	36	competent
19	W	27	0.9	0.1	0.2	53	290	390	350	36	competent
20	W	23	0.7	0.05	0	53	770	1040	870	36	competent
21	W	23	0.8	0.2	0	53	1300	1760	1600	36	competent
22	W	20	0.7	0	0	53	5000	6790	7000	36	competent
23	M	21	0.7	0.2	0	53	900	1220	NA	36	competent
24	M	23	0.75	0.15	0.33	53	1100	1490	1450	36	competent
25	M	23	0.4	0.05	0.25	53	1200	1630	1200	36	competent
26	W	25	0.4	0.1	0.05	53	1600	2170	1950	36	competent
27	W	20	0.85	0.1	0	53	700	950	900	36	competent
28	M	21	0.8	0.3	0.5	53	600	810	705	36	competent
29	M	31	0.4	0	0.2	53	3400	4620	4111	36	competent
1	M	25	0.7	0.35	0	54	1450	1710	1560	18	random number
2	M	29	0.3	0.1	0	54	1000	1180	1000	18	random number
3	M	23	0.35	0.15	0.25	54	260	300	260	18	random number
4	W	25	0.8	0.1	0	54	5000	5900	5000	18	random number
5	M	24	0.67	0.34	0.02	54	658	770	699	18	random number
6	W	30	0.8	0.4	0	54	2500	2950	2600	18	random number
7	W	22	0.75	0.25	0	54	1500	1770	1770	18	random number
8	W	20	0.8	0.2	0	54	800	940	800	18	random number
9	M	23	0.4	0.1	0	54	1700	2000	2000	18	random number
10	W	20	0.9	0.15	0.1	54	700	820	700	18	random number
11	M	23	0.4	0.05	0	54	380	440	380	18	random number
12	M	24	0.05	0	0	54	1700	2000	1800	18	random number
13	M	23	0.6	0.3	0.1	54	2000	2360	2000	18	random number
14	W	22	0.9	0.2	0	54	700	820	750	18	random number
15	W	24	0.75	0.45	0.05	54	1800	2120	1800	18	random number
16	W	26	0.5	0.1	0	54	550	640	600	18	random number
17	M	22	0.5	0.1	0	54	800	940	800	18	random number
18	M	26	0.65	0.4	0.15	54	750	880	790	18	random number
19	W	27	0.9	0.1	0.2	54	490	570	490	18	random number
20	W	23	0.7	0.05	0	54	700	820	700	18	random number
21	W	23	0.8	0.2	0	54	1200	1410	1300	18	random number
22	W	20	0.7	0	0	54	5000	5900	5000	18	random number
23	M	21	0.7	0.2	0	54	2000	2360	2100	18	random number
24	M	23	0.75	0.15	0.33	54	1600	1880	1800	18	random number
25	M	23	0.4	0.05	0.25	54	2800	3300	2800	18	random number
26	W	25	0.4	0.1	0.05	54	3900	4600	3900	18	random number
27	W	20	0.85	0.1	0	54	400	470	450	18	random number
28	M	21	0.8	0.3	0.5	54	478	560	483	18	random number
29	M	31	0.4	0	0.2	54	1900	2240	2222	18	random number
1	M	25	0.7	0.35	0	55	430	570	470	34	competent
2	M	29	0.3	0.1	0	55	800	1070	900	34	competent
3	M	23	0.35	0.15	0.25	55	900	1200	1150	34	competent
4	W	25	0.8	0.1	0	55	2200	2940	2940	34	competent
5	M	24	0.67	0.34	0.02	55	478	640	534	34	competent
6	W	30	0.8	0.4	0	55	2200	2940	2500	34	competent
7	W	22	0.75	0.25	0	55	1760	2350	1900	34	competent
8	W	20	0.8	0.2	0	55	700	930	800	34	competent
9	M	23	0.4	0.1	0	55	900	1200	1080	34	competent
10	W	20	0.9	0.15	0.1	55	900	1200	1200	34	competent
11	M	23	0.4	0.05	0	55	300	400	320	34	competent
12	M	24	0.05	0	0	55	700	930	750	34	competent
13	M	23	0.6	0.3	0.1	55	1000	1340	1200	34	competent
14	W	22	0.9	0.2	0	55	600	800	700	34	competent
15	W	24	0.75	0.45	0.05	55	900	1200	1150	34	competent
16	W	26	0.5	0.1	0	55	660	880	790	34	competent
17	M	22	0.5	0.1	0	55	1000	1340	1150	34	competent
18	M	26	0.65	0.4	0.15	55	450	600	470	34	competent
19	W	27	0.9	0.1	0.2	55	375	500	475	34	competent
20	W	23	0.7	0.05	0	55	550	730	630	34	competent
21	W	23	0.8	0.2	0	55	1100	1470	1380	34	competent
22	W	20	0.7	0	0	55	6000	2300	2500	34	competent
23	M	21	0.7	0.2	0	55	1000	1340	1200	34	competent
24	M	23	0.75	0.15	0.33	55	1200	1600	1450	34	competent
25	M	23	0.4	0.05	0.25	55	800	1070	800	34	competent
26	W	25	0.4	0.1	0.05	55	2500	3350	2800	34	competent
27	W	20	0.85	0.1	0	55	400	530	550	34	competent
28	M	21	0.8	0.3	0.5	55	570	760	619	34	competent
29	M	31	0.4	0	0.2	55	1100	1470	1350	34	competent
1	M	25	0.7	0.35	0	56	650	570	750	NA	no advice
2	M	29	0.3	0.1	0	56	1250	1070	1250	NA	no advice
3	M	23	0.35	0.15	0.25	56	1000	1200	1000	NA	no advice
4	W	25	0.8	0.1	0	56	3210	2940	3000	NA	no advice
5	M	24	0.67	0.34	0.02	56	NA	640	766	NA	no advice
6	W	30	0.8	0.4	0	56	2500	2940	2400	NA	no advice
7	W	22	0.75	0.25	0	56	800	2350	NA	NA	no advice
8	W	20	0.8	0.2	0	56	1000	930	1000	NA	no advice
9	M	23	0.4	0.1	0	56	790	1200	790	NA	no advice
10	W	20	0.9	0.15	0.1	56	2000	1200	1800	NA	no advice
11	M	23	0.4	0.05	0	56	710	400	720	NA	no advice
12	M	24	0.05	0	0	56	860	930	860	NA	no advice
13	M	23	0.6	0.3	0.1	56	2000	1340	2000	NA	no advice
14	W	22	0.9	0.2	0	56	900	800	850	NA	no advice
15	W	24	0.75	0.45	0.05	56	1100	1200	1110	NA	no advice
16	W	26	0.5	0.1	0	56	1000	880	800	NA	no advice
17	M	22	0.5	0.1	0	56	1400	1340	1400	NA	no advice
18	M	26	0.65	0.4	0.15	56	790	600	790	NA	no advice
19	W	27	0.9	0.1	0.2	56	780	500	780	NA	no advice
20	W	23	0.7	0.05	0	56	870	730	870	NA	no advice
21	W	23	0.8	0.2	0	56	1400	1470	1400	NA	no advice
22	W	20	0.7	0	0	56	3000	2300	3000	NA	no advice
23	M	21	0.7	0.2	0	56	1300	1340	1300	NA	no advice
24	M	23	0.75	0.15	0.33	56	1300	1600	1300	NA	no advice
25	M	23	0.4	0.05	0.25	56	1800	1070	1900	NA	no advice
26	W	25	0.4	0.1	0.05	56	3050	3350	3700	NA	no advice
27	W	20	0.85	0.1	0	56	500	530	500	NA	no advice
28	M	21	0.8	0.3	0.5	56	1800	760	1800	NA	no advice
29	M	31	0.4	0	0.2	56	NA	1470	1800	NA	no advice
1	M	25	0.7	0.35	0	57	470	620	470	34	random number
2	M	29	0.3	0.1	0	57	1200	1600	1250	34	random number
3	M	23	0.35	0.15	0.25	57	790	1050	850	34	random number
4	W	25	0.8	0.1	0	57	3500	4690	3500	34	random number
5	M	24	0.67	0.34	0.02	57	444	590	443	34	random number
6	W	30	0.8	0.4	0	57	2800	3750	3000	34	random number
7	W	22	0.75	0.25	0	57	1800	2410	2410	34	random number
8	W	20	0.8	0.2	0	57	1500	2010	1600	34	random number
9	M	23	0.4	0.1	0	57	1000	1340	1340	34	random number
10	W	20	0.9	0.15	0.1	57	1700	2270	1700	34	random number
11	M	23	0.4	0.05	0	57	800	1070	950	34	random number
12	M	24	0.05	0	0	57	650	870	800	34	random number
13	M	23	0.6	0.3	0.1	57	1500	2010	1500	34	random number
14	W	22	0.9	0.2	0	57	1500	2010	1500	34	random number
15	W	24	0.75	0.45	0.05	57	1200	1600	1100	34	random number
16	W	26	0.5	0.1	0	57	950	1270	1100	34	random number
17	M	22	0.5	0.1	0	57	800	1070	800	34	random number
18	M	26	0.65	0.4	0.15	57	650	870	690	34	random number
19	W	27	0.9	0.1	0.2	57	685	910	685	34	random number
20	W	23	0.7	0.05	0	57	650	870	620	34	random number
21	W	23	0.8	0.2	0	57	900	1200	900	34	random number
22	W	20	0.7	0	0	57	4000	5360	6000	34	random number
23	M	21	0.7	0.2	0	57	1200	1600	1200	34	random number
24	M	23	0.75	0.15	0.33	57	1000	1340	1000	34	random number
25	M	23	0.4	0.05	0.25	57	1500	2010	1500	34	random number
26	W	25	0.4	0.1	0.05	57	2150	2880	2150	34	random number
27	W	20	0.85	0.1	0	57	250	330	250	34	random number
28	M	21	0.8	0.3	0.5	57	490	650	533	34	random number
29	M	31	0.4	0	0.2	57	1800	2410	2222	34	random number
1	M	25	0.7	0.35	0	58	730	610	730	-16	random number
2	M	29	0.3	0.1	0	58	750	630	700	-16	random number
3	M	23	0.35	0.15	0.25	58	770	640	690	-16	random number
4	W	25	0.8	0.1	0	58	2100	1760	2100	-16	random number
5	M	24	0.67	0.34	0.02	58	420	350	401	-16	random number
6	W	30	0.8	0.4	0	58	900	750	800	-16	random number
7	W	22	0.75	0.25	0	58	940	780	780	-16	random number
8	W	20	0.8	0.2	0	58	800	670	800	-16	random number
9	M	23	0.4	0.1	0	58	600	500	500	-16	random number
10	W	20	0.9	0.15	0.1	58	900	750	900	-16	random number
11	M	23	0.4	0.05	0	58	530	440	530	-16	random number
12	M	24	0.05	0	0	58	700	580	650	-16	random number
13	M	23	0.6	0.3	0.1	58	2000	1680	2000	-16	random number
14	W	22	0.9	0.2	0	58	700	580	650	-16	random number
15	W	24	0.75	0.45	0.05	58	800	670	800	-16	random number
16	W	26	0.5	0.1	0	58	830	690	820	-16	random number
17	M	22	0.5	0.1	0	58	900	750	900	-16	random number
18	M	26	0.65	0.4	0.15	58	600	500	650	-16	random number
19	W	27	0.9	0.1	0.2	58	320	260	320	-16	random number
20	W	23	0.7	0.05	0	58	660	550	660	-16	random number
21	W	23	0.8	0.2	0	58	850	710	850	-16	random number
22	W	20	0.7	0	0	58	2500	2100	2500	-16	random number
23	M	21	0.7	0.2	0	58	900	750	900	-16	random number
24	M	23	0.75	0.15	0.33	58	1050	880	950	-16	random number
25	M	23	0.4	0.05	0.25	58	1200	1000	1200	-16	random number
26	W	25	0.4	0.1	0.05	58	2800	2350	2700	-16	random number
27	W	20	0.85	0.1	0	58	600	500	600	-16	random number
28	M	21	0.8	0.3	0.5	58	780	650	700	-16	random number
29	M	31	0.4	0	0.2	58	900	750	800	-16	random number
1	M	25	0.7	0.35	0	59	930	610	830	NA	no advice
2	M	29	0.3	0.1	0	59	650	630	650	NA	no advice
3	M	23	0.35	0.15	0.25	59	530	640	530	NA	no advice
4	W	25	0.8	0.1	0	59	1800	1760	1900	NA	no advice
5	M	24	0.67	0.34	0.02	59	NA	350	259	NA	no advice
6	W	30	0.8	0.4	0	59	1500	750	1500	NA	no advice
7	W	22	0.75	0.25	0	59	1050	780	NA	NA	no advice
8	W	20	0.8	0.2	0	59	700	670	700	NA	no advice
9	M	23	0.4	0.1	0	59	450	500	560	NA	no advice
10	W	20	0.9	0.15	0.1	59	500	750	500	NA	no advice
11	M	23	0.4	0.05	0	59	620	440	600	NA	no advice
12	M	24	0.05	0	0	59	380	580	380	NA	no advice
13	M	23	0.6	0.3	0.1	59	1000	1680	800	NA	no advice
14	W	22	0.9	0.2	0	59	300	580	250	NA	no advice
15	W	24	0.75	0.45	0.05	59	790	670	750	NA	no advice
16	W	26	0.5	0.1	0	59	530	690	500	NA	no advice
17	M	22	0.5	0.1	0	59	500	750	600	NA	no advice
18	M	26	0.65	0.4	0.15	59	700	500	700	NA	no advice
19	W	27	0.9	0.1	0.2	59	475	260	475	NA	no advice
20	W	23	0.7	0.05	0	59	670	550	650	NA	no advice
21	W	23	0.8	0.2	0	59	750	710	750	NA	no advice
22	W	20	0.7	0	0	59	3000	2100	3000	NA	no advice
23	M	21	0.7	0.2	0	59	900	750	900	NA	no advice
24	M	23	0.75	0.15	0.33	59	800	880	900	NA	no advice
25	M	23	0.4	0.05	0.25	59	1100	1000	1100	NA	no advice
26	W	25	0.4	0.1	0.05	59	1800	2350	1750	NA	no advice
27	W	20	0.85	0.1	0	59	300	500	300	NA	no advice
28	M	21	0.8	0.3	0.5	59	650	650	700	NA	no advice
29	M	31	0.4	0	0.2	59	1100	750	900	NA	no advice
1	M	25	0.7	0.35	0	60	200	120	200	-38	somewhat competent
2	M	29	0.3	0.1	0	60	700	430	700	-38	somewhat competent
3	M	23	0.35	0.15	0.25	60	300	180	260	-38	somewhat competent
4	W	25	0.8	0.1	0	60	1600	990	1600	-38	somewhat competent
5	M	24	0.67	0.34	0.02	60	300	180	320	-38	somewhat competent
6	W	30	0.8	0.4	0	60	2000	1240	2000	-38	somewhat competent
7	W	22	0.75	0.25	0	60	1470	910	NA	-38	somewhat competent
8	W	20	0.8	0.2	0	60	800	490	750	-38	somewhat competent
9	M	23	0.4	0.1	0	60	340	210	340	-38	somewhat competent
10	W	20	0.9	0.15	0.1	60	500	310	500	-38	somewhat competent
11	M	23	0.4	0.05	0	60	300	180	280	-38	somewhat competent
12	M	24	0.05	0	0	60	560	340	400	-38	somewhat competent
13	M	23	0.6	0.3	0.1	60	1000	620	900	-38	somewhat competent
14	W	22	0.9	0.2	0	60	500	310	400	-38	somewhat competent
15	W	24	0.75	0.45	0.05	60	450	270	350	-38	somewhat competent
16	W	26	0.5	0.1	0	60	700	430	600	-38	somewhat competent
17	M	22	0.5	0.1	0	60	900	550	870	-38	somewhat competent
18	M	26	0.65	0.4	0.15	60	450	270	400	-38	somewhat competent
19	W	27	0.9	0.1	0.2	60	NA	110	NA	-38	somewhat competent
20	W	23	0.7	0.05	0	60	530	320	530	-38	somewhat competent
21	W	23	0.8	0.2	0	60	250	150	250	-38	somewhat competent
22	W	20	0.7	0	0	60	2500	1550	2500	-38	somewhat competent
23	M	21	0.7	0.2	0	60	1400	860	1300	-38	somewhat competent
24	M	23	0.75	0.15	0.33	60	800	490	800	-38	somewhat competent
25	M	23	0.4	0.05	0.25	60	800	490	800	-38	somewhat competent
26	W	25	0.4	0.1	0.05	60	1650	1020	1650	-38	somewhat competent
27	W	20	0.85	0.1	0	60	350	210	350	-38	somewhat competent
28	M	21	0.8	0.3	0.5	60	900	550	879	-38	somewhat competent
29	M	31	0.4	0	0.2	60	1100	680	777	-38	somewhat competent
1	M	25	0.7	0.35	0	61	730	120	730	NA	no advice
2	M	29	0.3	0.1	0	61	1000	430	1000	NA	no advice
3	M	23	0.35	0.15	0.25	61	1100	180	1100	NA	no advice
4	W	25	0.8	0.1	0	61	2200	990	2300	NA	no advice
5	M	24	0.67	0.34	0.02	61	222	180	222	NA	no advice
6	W	30	0.8	0.4	0	61	3200	1240	2900	NA	no advice
7	W	22	0.75	0.25	0	61	1950	910	NA	NA	no advice
8	W	20	0.8	0.2	0	61	NA	490	1000	NA	no advice
9	M	23	0.4	0.1	0	61	1100	210	1100	NA	no advice
10	W	20	0.9	0.15	0.1	61	900	310	908	NA	no advice
11	M	23	0.4	0.05	0	61	530	180	500	NA	no advice
12	M	24	0.05	0	0	61	740	340	740	NA	no advice
13	M	23	0.6	0.3	0.1	61	1000	620	1000	NA	no advice
14	W	22	0.9	0.2	0	61	800	310	750	NA	no advice
15	W	24	0.75	0.45	0.05	61	980	270	1100	NA	no advice
16	W	26	0.5	0.1	0	61	1450	430	1300	NA	no advice
17	M	22	0.5	0.1	0	61	1000	550	1000	NA	no advice
18	M	26	0.65	0.4	0.15	61	560	270	580	NA	no advice
19	W	27	0.9	0.1	0.2	61	455	110	455	NA	no advice
20	W	23	0.7	0.05	0	61	560	320	540	NA	no advice
21	W	23	0.8	0.2	0	61	650	150	650	NA	no advice
22	W	20	0.7	0	0	61	5000	1550	5000	NA	no advice
23	M	21	0.7	0.2	0	61	1000	860	1001	NA	no advice
24	M	23	0.75	0.15	0.33	61	1200	490	1000	NA	no advice
25	M	23	0.4	0.05	0.25	61	800	490	800	NA	no advice
26	W	25	0.4	0.1	0.05	61	2650	1020	2550	NA	no advice
27	W	20	0.85	0.1	0	61	400	210	450	NA	no advice
28	M	21	0.8	0.3	0.5	61	570	550	590	NA	no advice
29	M	31	0.4	0	0.2	61	1900	680	1200	NA	no advice
1	M	25	0.7	0.35	0	62	2450	2890	2450	18	somewhat competent
2	M	29	0.3	0.1	0	62	1490	1750	1500	18	somewhat competent
3	M	23	0.35	0.15	0.25	62	1260	1480	1260	18	somewhat competent
4	W	25	0.8	0.1	0	62	2310	2720	2310	18	somewhat competent
5	M	24	0.67	0.34	0.02	62	342	400	322	18	somewhat competent
6	W	30	0.8	0.4	0	62	3000	3540	3333	18	somewhat competent
7	W	22	0.75	0.25	0	62	1250	1470	NA	18	somewhat competent
8	W	20	0.8	0.2	0	62	2000	2360	2100	18	somewhat competent
9	M	23	0.4	0.1	0	62	1800	2120	1970	18	somewhat competent
10	W	20	0.9	0.15	0.1	62	1200	1410	1200	18	somewhat competent
11	M	23	0.4	0.05	0	62	850	1000	900	18	somewhat competent
12	M	24	0.05	0	0	62	1100	1290	1100	18	somewhat competent
13	M	23	0.6	0.3	0.1	62	3000	3540	3200	18	somewhat competent
14	W	22	0.9	0.2	0	62	1500	1770	2000	18	somewhat competent
15	W	24	0.75	0.45	0.05	62	1200	1410	1250	18	somewhat competent
16	W	26	0.5	0.1	0	62	1200	1410	1340	18	somewhat competent
17	M	22	0.5	0.1	0	62	2500	2950	2550	18	somewhat competent
18	M	26	0.65	0.4	0.15	62	950	1120	950	18	somewhat competent
19	W	27	0.9	0.1	0.2	62	780	920	790	18	somewhat competent
20	W	23	0.7	0.05	0	62	900	1060	1100	18	somewhat competent
21	W	23	0.8	0.2	0	62	NA	120	1100	18	somewhat competent
22	W	20	0.7	0	0	62	7000	4000	7000	18	somewhat competent
23	M	21	0.7	0.2	0	62	1600	1880	1600	18	somewhat competent
24	M	23	0.75	0.15	0.33	62	1510	1780	1700	18	somewhat competent
25	M	23	0.4	0.05	0.25	62	2500	2950	2500	18	somewhat competent
26	W	25	0.4	0.1	0.05	62	3000	3540	3000	18	somewhat competent
27	W	20	0.85	0.1	0	62	1000	1180	1000	18	somewhat competent
28	M	21	0.8	0.3	0.5	62	1799	2120	2000	18	somewhat competent
29	M	31	0.4	0	0.2	62	1900	2240	1999	18	somewhat competent
1	M	25	0.7	0.35	0	63	1900	1360	1900	-28	random number
2	M	29	0.3	0.1	0	63	400	280	400	-28	random number
3	M	23	0.35	0.15	0.25	63	260	180	260	-28	random number
4	W	25	0.8	0.1	0	63	700	500	700	-28	random number
5	M	24	0.67	0.34	0.02	63	NA	100	NA	-28	random number
6	W	30	0.8	0.4	0	63	1000	720	800	-28	random number
7	W	22	0.75	0.25	0	63	1340	960	960	-28	random number
8	W	20	0.8	0.2	0	63	200	140	200	-28	random number
9	M	23	0.4	0.1	0	63	590	420	420	-28	random number
10	W	20	0.9	0.15	0.1	63	NA	3000	NA	-28	random number
11	M	23	0.4	0.05	0	63	300	210	300	-28	random number
12	M	24	0.05	0	0	63	600	430	430	-28	random number
13	M	23	0.6	0.3	0.1	63	800	570	800	-28	random number
14	W	22	0.9	0.2	0	63	1000	720	900	-28	random number
15	W	24	0.75	0.45	0.05	63	750	540	750	-28	random number
16	W	26	0.5	0.1	0	63	260	180	240	-28	random number
17	M	22	0.5	0.1	0	63	400	280	400	-28	random number
18	M	26	0.65	0.4	0.15	63	270	190	270	-28	random number
19	W	27	0.9	0.1	0.2	63	290	200	290	-28	random number
20	W	23	0.7	0.05	0	63	350	250	350	-28	random number
21	W	23	0.8	0.2	0	63	350	250	350	-28	random number
22	W	20	0.7	0	0	63	1000	720	NA	-28	random number
23	M	21	0.7	0.2	0	63	400	280	400	-28	random number
24	M	23	0.75	0.15	0.33	63	750	540	700	-28	random number
25	M	23	0.4	0.05	0.25	63	700	500	600	-28	random number
26	W	25	0.4	0.1	0.05	63	1090	780	1000	-28	random number
27	W	20	0.85	0.1	0	63	300	210	300	-28	random number
28	M	21	0.8	0.3	0.5	63	430	300	400	-28	random number
29	M	31	0.4	0	0.2	63	700	500	550	-28	random number
1	M	25	0.7	0.35	0	64	460	310	430	-32	random number
2	M	29	0.3	0.1	0	64	300	200	280	-32	random number
3	M	23	0.35	0.15	0.25	64	NA	2100	NA	-32	random number
4	W	25	0.8	0.1	0	64	800	540	700	-32	random number
5	M	24	0.67	0.34	0.02	64	214	140	NA	-32	random number
6	W	30	0.8	0.4	0	64	400	270	300	-32	random number
7	W	22	0.75	0.25	0	64	560	380	380	-32	random number
8	W	20	0.8	0.2	0	64	NA	500	NA	-32	random number
9	M	23	0.4	0.1	0	64	340	230	230	-32	random number
10	W	20	0.9	0.15	0.1	64	NA	3700	NA	-32	random number
11	M	23	0.4	0.05	0	64	240	160	200	-32	random number
12	M	24	0.05	0	0	64	NA	2000	NA	-32	random number
13	M	23	0.6	0.3	0.1	64	500	330	500	-32	random number
14	W	22	0.9	0.2	0	64	NA	600	200	-32	random number
15	W	24	0.75	0.45	0.05	64	250	160	220	-32	random number
16	W	26	0.5	0.1	0	64	250	160	230	-32	random number
17	M	22	0.5	0.1	0	64	300	200	300	-32	random number
18	M	26	0.65	0.4	0.15	64	NA	100	NA	-32	random number
19	W	27	0.9	0.1	0.2	64	NA	100	NA	-32	random number
20	W	23	0.7	0.05	0	64	NA	1900	NA	-32	random number
21	W	23	0.8	0.2	0	64	NA	100	NA	-32	random number
22	W	20	0.7	0	0	64	500	330	500	-32	random number
23	M	21	0.7	0.2	0	64	300	200	200	-32	random number
24	M	23	0.75	0.15	0.33	64	200	130	NA	-32	random number
25	M	23	0.4	0.05	0.25	64	NA	2600	NA	-32	random number
26	W	25	0.4	0.1	0.05	64	300	200	300	-32	random number
27	W	20	0.85	0.1	0	64	300	200	300	-32	random number
28	M	21	0.8	0.3	0.5	64	NA	120	NA	-32	random number
29	M	31	0.4	0	0.2	64	290	190	250	-32	random number
1	M	25	0.7	0.35	0	65	1340	310	1340	NA	no advice
2	M	29	0.3	0.1	0	65	950	200	950	NA	no advice
3	M	23	0.35	0.15	0.25	65	550	2100	550	NA	no advice
4	W	25	0.8	0.1	0	65	2200	540	2200	NA	no advice
5	M	24	0.67	0.34	0.02	65	211	140	211	NA	no advice
6	W	30	0.8	0.4	0	65	1000	270	1000	NA	no advice
7	W	22	0.75	0.25	0	65	1570	380	NA	NA	no advice
8	W	20	0.8	0.2	0	65	500	500	500	NA	no advice
9	M	23	0.4	0.1	0	65	600	230	570	NA	no advice
10	W	20	0.9	0.15	0.1	65	400	3700	400	NA	no advice
11	M	23	0.4	0.05	0	65	500	160	480	NA	no advice
12	M	24	0.05	0	0	65	900	2000	900	NA	no advice
13	M	23	0.6	0.3	0.1	65	3000	330	2500	NA	no advice
14	W	22	0.9	0.2	0	65	400	600	450	NA	no advice
15	W	24	0.75	0.45	0.05	65	850	160	790	NA	no advice
16	W	26	0.5	0.1	0	65	1200	160	1350	NA	no advice
17	M	22	0.5	0.1	0	65	200	200	2000	NA	no advice
18	M	26	0.65	0.4	0.15	65	600	100	600	NA	no advice
19	W	27	0.9	0.1	0.2	65	270	100	280	NA	no advice
20	W	23	0.7	0.05	0	65	700	1900	700	NA	no advice
21	W	23	0.8	0.2	0	65	600	100	600	NA	no advice
22	W	20	0.7	0	0	65	3500	330	3500	NA	no advice
23	M	21	0.7	0.2	0	65	1400	200	1400	NA	no advice
24	M	23	0.75	0.15	0.33	65	1111	130	1000	NA	no advice
25	M	23	0.4	0.05	0.25	65	1200	2600	1300	NA	no advice
26	W	25	0.4	0.1	0.05	65	1200	200	1900	NA	no advice
27	W	20	0.85	0.1	0	65	600	200	600	NA	no advice
28	M	21	0.8	0.3	0.5	65	800	120	966	NA	no advice
29	M	31	0.4	0	0.2	65	1800	190	1200	NA	no advice
1	M	25	0.7	0.35	0	66	2030	1500	2030	-26	somewhat competent
2	M	29	0.3	0.1	0	66	1200	880	1200	-26	somewhat competent
3	M	23	0.35	0.15	0.25	66	NA	700	550	-26	somewhat competent
4	W	25	0.8	0.1	0	66	3200	2360	3000	-26	somewhat competent
5	M	24	0.67	0.34	0.02	66	300	220	NA	-26	somewhat competent
6	W	30	0.8	0.4	0	66	2300	1700	2300	-26	somewhat competent
7	W	22	0.75	0.25	0	66	1452	1070	NA	-26	somewhat competent
8	W	20	0.8	0.2	0	66	900	660	900	-26	somewhat competent
9	M	23	0.4	0.1	0	66	840	620	840	-26	somewhat competent
10	W	20	0.9	0.15	0.1	66	909	670	909	-26	somewhat competent
11	M	23	0.4	0.05	0	66	700	510	700	-26	somewhat competent
12	M	24	0.05	0	0	66	1200	880	1000	-26	somewhat competent
13	M	23	0.6	0.3	0.1	66	1500	1110	1400	-26	somewhat competent
14	W	22	0.9	0.2	0	66	600	440	550	-26	somewhat competent
15	W	24	0.75	0.45	0.05	66	980	720	950	-26	somewhat competent
16	W	26	0.5	0.1	0	66	1920	1420	1700	-26	somewhat competent
17	M	22	0.5	0.1	0	66	1100	810	1000	-26	somewhat competent
18	M	26	0.65	0.4	0.15	66	780	570	780	-26	somewhat competent
19	W	27	0.9	0.1	0.2	66	280	200	280	-26	somewhat competent
20	W	23	0.7	0.05	0	66	680	500	680	-26	somewhat competent
21	W	23	0.8	0.2	0	66	850	620	850	-26	somewhat competent
22	W	20	0.7	0	0	66	2000	1480	2000	-26	somewhat competent
23	M	21	0.7	0.2	0	66	1500	1110	1450	-26	somewhat competent
24	M	23	0.75	0.15	0.33	66	1200	880	1200	-26	somewhat competent
25	M	23	0.4	0.05	0.25	66	2000	1480	2000	-26	somewhat competent
26	W	25	0.4	0.1	0.05	66	1600	1180	1500	-26	somewhat competent
27	W	20	0.85	0.1	0	66	500	370	500	-26	somewhat competent
28	M	21	0.8	0.3	0.5	66	1000	740	1105	-26	somewhat competent
29	M	31	0.4	0	0.2	66	600	440	550	-26	somewhat competent
1	M	25	0.7	0.35	0	67	1340	1120	1240	-16	competent
2	M	29	0.3	0.1	0	67	400	330	400	-16	competent
3	M	23	0.35	0.15	0.25	67	990	830	990	-16	competent
4	W	25	0.8	0.1	0	67	1700	1420	1450	-16	competent
5	M	24	0.67	0.34	0.02	67	NA	130	NA	-16	competent
6	W	30	0.8	0.4	0	67	1500	1260	1300	-16	competent
7	W	22	0.75	0.25	0	67	900	750	NA	-16	competent
8	W	20	0.8	0.2	0	67	500	420	480	-16	competent
9	M	23	0.4	0.1	0	67	450	370	390	-16	competent
10	W	20	0.9	0.15	0.1	67	800	670	700	-16	competent
11	M	23	0.4	0.05	0	67	480	400	450	-16	competent
12	M	24	0.05	0	0	67	480	400	480	-16	competent
13	M	23	0.6	0.3	0.1	67	800	670	700	-16	competent
14	W	22	0.9	0.2	0	67	400	330	400	-16	competent
15	W	24	0.75	0.45	0.05	67	989	830	860	-16	competent
16	W	26	0.5	0.1	0	67	830	690	700	-16	competent
17	M	22	0.5	0.1	0	67	2000	1680	1800	-16	competent
18	M	26	0.65	0.4	0.15	67	550	460	530	-16	competent
19	W	27	0.9	0.1	0.2	67	NA	150	NA	-16	competent
20	W	23	0.7	0.05	0	67	650	540	650	-16	competent
21	W	23	0.8	0.2	0	67	950	790	820	-16	competent
22	W	20	0.7	0	0	67	1500	1260	1260	-16	competent
23	M	21	0.7	0.2	0	67	1000	840	900	-16	competent
24	M	23	0.75	0.15	0.33	67	800	670	730	-16	competent
25	M	23	0.4	0.05	0.25	67	800	670	800	-16	competent
26	W	25	0.4	0.1	0.05	67	900	750	850	-16	competent
27	W	20	0.85	0.1	0	67	500	420	450	-16	competent
28	M	21	0.8	0.3	0.5	67	500	420	490	-16	competent
29	M	31	0.4	0	0.2	67	1300	1090	1200	-16	competent
1	M	25	0.7	0.35	0	68	1130	1400	1130	24	random number
2	M	29	0.3	0.1	0	68	950	1170	1050	24	random number
3	M	23	0.35	0.15	0.25	68	870	1070	870	24	random number
4	W	25	0.8	0.1	0	68	2500	3100	2600	24	random number
5	M	24	0.67	0.34	0.02	68	322	390	322	24	random number
6	W	30	0.8	0.4	0	68	1800	2230	2000	24	random number
7	W	22	0.75	0.25	0	68	1360	1680	1680	24	random number
8	W	20	0.8	0.2	0	68	900	1110	1000	24	random number
9	M	23	0.4	0.1	0	68	1150	1420	1290	24	random number
10	W	20	0.9	0.15	0.1	68	690	850	690	24	random number
11	M	23	0.4	0.05	0	68	650	800	700	24	random number
12	M	24	0.05	0	0	68	840	1040	940	24	random number
13	M	23	0.6	0.3	0.1	68	2500	3100	2500	24	random number
14	W	22	0.9	0.2	0	68	1500	1860	1600	24	random number
15	W	24	0.75	0.45	0.05	68	990	1220	990	24	random number
16	W	26	0.5	0.1	0	68	650	800	650	24	random number
17	M	22	0.5	0.1	0	68	1500	1860	1860	24	random number
18	M	26	0.65	0.4	0.15	68	800	990	850	24	random number
19	W	27	0.9	0.1	0.2	68	490	600	490	24	random number
20	W	23	0.7	0.05	0	68	600	740	600	24	random number
21	W	23	0.8	0.2	0	68	1300	1610	1300	24	random number
22	W	20	0.7	0	0	68	4000	4960	4000	24	random number
23	M	21	0.7	0.2	0	68	1500	1860	1650	24	random number
24	M	23	0.75	0.15	0.33	68	1000	1240	1100	24	random number
25	M	23	0.4	0.05	0.25	68	1400	1730	1400	24	random number
26	W	25	0.4	0.1	0.05	68	2600	3220	2600	24	random number
27	W	20	0.85	0.1	0	68	600	740	650	24	random number
28	M	21	0.8	0.3	0.5	68	1000	1240	1100	24	random number
29	M	31	0.4	0	0.2	68	1800	2230	2100	24	random number
1	M	25	0.7	0.35	0	69	1320	1710	1340	30	somewhat competent
2	M	29	0.3	0.1	0	69	1400	1820	1450	30	somewhat competent
3	M	23	0.35	0.15	0.25	69	730	940	770	30	somewhat competent
4	W	25	0.8	0.1	0	69	2800	3640	2900	30	somewhat competent
5	M	24	0.67	0.34	0.02	69	322	410	301	30	somewhat competent
6	W	30	0.8	0.4	0	69	2500	3250	2500	30	somewhat competent
7	W	22	0.75	0.25	0	69	1780	2310	2000	30	somewhat competent
8	W	20	0.8	0.2	0	69	1200	1560	1200	30	somewhat competent
9	M	23	0.4	0.1	0	69	1300	1690	1470	30	somewhat competent
10	W	20	0.9	0.15	0.1	69	1000	1300	1000	30	somewhat competent
11	M	23	0.4	0.05	0	69	820	1060	900	30	somewhat competent
12	M	24	0.05	0	0	69	1200	1560	1320	30	somewhat competent
13	M	23	0.6	0.3	0.1	69	4000	5200	4400	30	somewhat competent
14	W	22	0.9	0.2	0	69	2000	2600	2100	30	somewhat competent
15	W	24	0.75	0.45	0.05	69	1200	1560	1300	30	somewhat competent
16	W	26	0.5	0.1	0	69	1450	1880	1600	30	somewhat competent
17	M	22	0.5	0.1	0	69	2200	2860	2300	30	somewhat competent
18	M	26	0.65	0.4	0.15	69	1050	1360	1150	30	somewhat competent
19	W	27	0.9	0.1	0.2	69	595	770	620	30	somewhat competent
20	W	23	0.7	0.05	0	69	700	910	730	30	somewhat competent
21	W	23	0.8	0.2	0	69	1500	1950	1500	30	somewhat competent
22	W	20	0.7	0	0	69	5000	6500	5000	30	somewhat competent
23	M	21	0.7	0.2	0	69	2000	2600	2000	30	somewhat competent
24	M	23	0.75	0.15	0.33	69	1100	1430	1100	30	somewhat competent
25	M	23	0.4	0.05	0.25	69	1200	1560	1200	30	somewhat competent
26	W	25	0.4	0.1	0.05	69	3000	3900	3100	30	somewhat competent
27	W	20	0.85	0.1	0	69	800	1040	800	30	somewhat competent
[truncated: 901 more rows]
