# Supplementary material for: On the Inability to Ignore Useless Advice
Source: Atypon-hosted journal article supplement (doi:10.1027/1618-3169/a000361), 2017-05-01
Supplement: 1618-3169_a000361_esm3.csv [file 1618-3169_a000361_esm3.csv]

VP	gender	age	randomRange	SOW_adv1	SOW_adv2	SOW_rdm	trial	IE	AD	FE	DEV	condition
1	M	21	extreme values	0.7	-0.1	0	1	400	260	400	-34	random number
2	W	22	extreme values	0.8	0.3	0	1	800	520	600	-34	random number
3	W	20	extreme values	0.5	0.2	0.2	1	500	320	400	-34	random number
4	W	26	extreme values	NA	NA	0	1	700	460	700	-34	random number
5	M	27	extreme values	0.15	0.05	0	1	600	390	600	-34	random number
6	W	25	extreme values	0.5	0.1	0	1	850	560	740	-34	random number
7	W	33	extreme values	0.5	0.1	0.1	1	500	320	500	-34	random number
8	W	26	extreme values	0.9	0.2	0	1	500	320	500	-34	random number
9	W	21	extreme values	0.65	0.1	0.35	1	600	390	600	-34	random number
10	W	24	extreme values	0.6	0.2	0	1	750	490	590	-34	random number
11	W	27	extreme values	0.75	0.1	0.35	1	2500	1640	2500	-34	random number
12	W	26	extreme values	0.7	0.1	0	1	800	520	900	-34	random number
13	W	23	extreme values	0.65	0.2	0	1	1500	980	1200	-34	random number
14	W	27	extreme values	0.6	0.05	0	1	1200	790	1200	-34	random number
15	W	27	extreme values	0.8	0.2	0.1	1	1000	650	1000	-34	random number
16	M	21	extreme values	0.65	0.5	0	1	655	430	NA	-34	random number
17	W	21	extreme values	0.9	-0.1	0	1	2000	1310	2050	-34	random number
18	M	25	extreme values	0.75	0.2	0	1	1800	1180	1800	-34	random number
19	W	24	extreme values	0.5	0.25	0.25	1	1056	690	1056	-34	random number
20	W	26	extreme values	0.75	0	0	1	700	460	700	-34	random number
21	W	20	extreme values	0.7	0.1	0	1	560	360	560	-34	random number
22	W	24	extreme values	0.75	0.3	0	1	500	320	590	-34	random number
23	W	21	extreme values	0.7	0.1	0	1	8500	5600	7500	-34	random number
24	W	21	extreme values	0.6	0.2	0	1	200	130	200	-34	random number
25	W	25	extreme values	0.5	0.3	0.01	1	6000	3950	6000	-34	random number
26	W	30	extreme values	0.6	0	0	1	950	620	800	-34	random number
27	W	29	extreme values	0.7	0.1	0	1	600	390	600	-34	random number
28	W	24	extreme values	0.65	0.3	0	1	1600	1050	1600	-34	random number
29	M	29	extreme values	0.3	0.1	0	1	600	390	400	-34	random number
30	M	24	extreme values	0.65	0.2	0	1	1000	650	1000	-34	random number
31	M	23	extreme values	0.75	-0.2	0	1	500	320	500	-34	random number
32	W	22	extreme values	0.5	0	0	1	1700	1120	1600	-34	random number
33	M	24	extreme values	0.05	0	0	1	250	160	250	-34	random number
34	W	27	extreme values	0.6	0	0	1	1100	720	1100	-34	random number
35	W	30	extreme values	0.5	0	0.25	1	200	130	NA	-34	random number
36	W	20	extreme values	0.85	0.1	0.5	1	1600	1050	1400	-34	random number
37	W	24	extreme values	0.2	0	0.3	1	1300	850	1300	-34	random number
38	W	21	extreme values	0.7	0.05	0	1	500	320	450	-34	random number
39	M	21	extreme values	0.55	0.05	0	1	350	230	350	-34	random number
40	W	22	extreme values	0.8	0.4	0.1	1	1000	650	1000	-34	random number
41	M	21	extreme values	0.7	0.15	0.1	1	1500	980	1500	-34	random number
42	M	21	extreme values	0.25	0.1	0	1	500	320	650	-34	random number
43	M	22	extreme values	0.6	-0.1	0	1	900	590	900	-34	random number
44	W	NA	extreme values	0.2	0	0	1	500	320	500	-34	random number
45	M	23	extreme values	0.7	0	0	1	350	230	350	-34	random number
46	W	23	extreme values	0.93	0.27	0.5	1	2000	1310	1500	-34	random number
47	M	21	extreme values	0.4	0.05	0.05	1	1100	720	1100	-34	random number
48	W	21	extreme values	0.8	0.2	0.1	1	2500	1640	2500	-34	random number
49	W	23	no extreme values	0.7	0.1	0.2	1	750	490	700	-34	random number
50	M	21	no extreme values	0.5	0.05	0	1	1800	1180	1800	-34	random number
51	W	25	no extreme values	0.3	0.45	0.1	1	1500	980	1450	-34	random number
52	M	25	no extreme values	0.45	-1	0.5	1	600	390	530	-34	random number
53	W	24	no extreme values	0.7	0	0	1	500	320	NA	-34	random number
54	W	25	no extreme values	0.7	0.35	0	1	500	320	460	-34	random number
55	W	25	no extreme values	0.8	-0.2	0	1	480	310	480	-34	random number
56	W	27	no extreme values	0.9	0.4	0.6	1	1800	1180	1500	-34	random number
57	W	25	no extreme values	0.8	0.1	0	1	3150	2070	3150	-34	random number
58	W	25	no extreme values	0.3	0.05	0.05	1	1165	760	1165	-34	random number
59	M	24	no extreme values	0.75	0.05	0	1	300	190	NA	-34	random number
60	M	31	no extreme values	0.85	0.45	0.5	1	750	490	790	-34	random number
61	W	NA	no extreme values	0.5	0.05	0	1	870	570	870	-34	random number
62	W	24	no extreme values	0.5	0.5	0	1	7500	4940	8000	-34	random number
63	W	NA	no extreme values	0.6	0.35	0	1	700	460	700	-34	random number
64	W	26	no extreme values	0.5	0.5	0.5	1	300	190	250	-34	random number
65	W	24	no extreme values	0.5	0.3	0.1	1	900	590	900	-34	random number
66	W	20	no extreme values	0.5	0.7	0	1	1500	980	NA	-34	random number
67	W	21	no extreme values	0.8	0.5	0	1	NA	90	NA	-34	random number
68	W	25	no extreme values	0.75	-0.1	0	1	250	160	250	-34	random number
69	W	21	no extreme values	0.7	0.4	0.5	1	2700	1780	1900	-34	random number
70	W	22	no extreme values	0.8	0	0	1	400	260	400	-34	random number
71	M	23	no extreme values	0.8	0.2	0	1	310	200	310	-34	random number
72	W	28	no extreme values	0.75	0.07	0.35	1	1087	710	956	-34	random number
73	W	27	no extreme values	0.9	0.2	0	1	2500	1640	2500	-34	random number
74	W	21	no extreme values	0.8	0.2	0.3	1	800	520	800	-34	random number
75	M	26	no extreme values	0.6	0.1	0	1	400	260	360	-34	random number
76	W	24	no extreme values	0.5	0.05	0.05	1	567	370	567	-34	random number
77	M	27	no extreme values	0.3	0	0	1	700	460	700	-34	random number
78	M	35	no extreme values	0.5	0.3	0.05	1	550	360	520	-34	random number
79	W	26	no extreme values	0.6	0.2	-0.5	1	600	390	300	-34	random number
80	W	22	no extreme values	0.8	0	0.2	1	965	630	965	-34	random number
81	W	26	no extreme values	0.35	0.5	0.5	1	3800	2500	3200	-34	random number
82	W	24	no extreme values	0.5	0	0	1	2300	1510	NA	-34	random number
83	M	22	no extreme values	0.6	0.2	0	1	800	520	800	-34	random number
84	W	22	no extreme values	0.8	0.1	0	1	NA	90	NA	-34	random number
85	W	23	no extreme values	0.5	-0.1	0	1	980	640	700	-34	random number
86	W	22	no extreme values	0.69	0.3	0.3	1	690	450	530	-34	random number
87	W	22	no extreme values	0.4	0.2	0	1	900	590	900	-34	random number
88	W	23	no extreme values	0.5	0.1	0	1	1000	650	1000	-34	random number
89	W	22	no extreme values	0.6	-0.1	0	1	500	320	500	-34	random number
90	W	22	no extreme values	0.25	-0.25	0.05	1	2000	1310	1800	-34	random number
91	W	24	no extreme values	0.7	0	0	1	800	520	800	-34	random number
92	W	20	no extreme values	0.5	0.1	0	1	1250	820	1250	-34	random number
93	W	26	no extreme values	0.25	-0.1	0	1	1200	790	1200	-34	random number
94	W	21	no extreme values	0.25	0.25	0	1	1600	1050	1600	-34	random number
95	W	25	no extreme values	0.7	0.5	0.1	1	650	420	650	-34	random number
96	W	25	no extreme values	0.6	0.2	0.1	1	800	520	750	-34	random number
97	W	25	no extreme values	0.75	0.5	0	1	650	420	650	-34	random number
98	W	26	no extreme values	0.7	0.1	0.2	1	600	390	600	-34	random number
99	M	23	no extreme values	0.4	0.02	0	1	560	360	480	-34	random number
1	M	21	extreme values	0.7	-0.1	0	2	1300	980	1300	-24	random number
2	W	22	extreme values	0.8	0.3	0	2	2200	1670	2000	-24	random number
3	W	20	extreme values	0.5	0.2	0.2	2	600	450	500	-24	random number
4	W	26	extreme values	NA	NA	0	2	1000	760	1000	-24	random number
5	M	27	extreme values	0.15	0.05	0	2	1200	910	1200	-24	random number
6	W	25	extreme values	0.5	0.1	0	2	2120	1610	2400	-24	random number
7	W	33	extreme values	0.5	0.1	0.1	2	1700	1290	1700	-24	random number
8	W	26	extreme values	0.9	0.2	0	2	3000	2280	3000	-24	random number
9	W	21	extreme values	0.65	0.1	0.35	2	700	530	700	-24	random number
10	W	24	extreme values	0.6	0.2	0	2	1900	1440	1900	-24	random number
11	W	27	extreme values	0.75	0.1	0.35	2	4000	3040	4000	-24	random number
12	W	26	extreme values	0.7	0.1	0	2	2500	1900	2500	-24	random number
13	W	23	extreme values	0.65	0.2	0	2	1300	980	2500	-24	random number
14	W	27	extreme values	0.6	0.05	0	2	1000	760	1000	-24	random number
15	W	27	extreme values	0.8	0.2	0.1	2	950	720	950	-24	random number
16	M	21	extreme values	0.65	0.5	0	2	1450	1100	1450	-24	random number
17	W	21	extreme values	0.9	-0.1	0	2	1900	1440	1900	-24	random number
18	M	25	extreme values	0.75	0.2	0	2	3560	2700	3560	-24	random number
19	W	24	extreme values	0.5	0.25	0.25	2	4285	3250	3850	-24	random number
20	W	26	extreme values	0.75	0	0	2	2200	1670	2200	-24	random number
21	W	20	extreme values	0.7	0.1	0	2	340	250	340	-24	random number
22	W	24	extreme values	0.75	0.3	0	2	1750	1330	1750	-24	random number
23	W	21	extreme values	0.7	0.1	0	2	900	680	900	-24	random number
24	W	21	extreme values	0.6	0.2	0	2	1800	1360	1800	-24	random number
25	W	25	extreme values	0.5	0.3	0.01	2	7000	5320	7000	-24	random number
26	W	30	extreme values	0.6	0	0	2	1800	1360	2000	-24	random number
27	W	29	extreme values	0.7	0.1	0	2	800	600	800	-24	random number
28	W	24	extreme values	0.65	0.3	0	2	3200	2430	3200	-24	random number
29	M	29	extreme values	0.3	0.1	0	2	500	380	500	-24	random number
30	M	24	extreme values	0.65	0.2	0	2	NA	0	2000	-24	random number
31	M	23	extreme values	0.75	-0.2	0	2	1500	1140	NA	-24	random number
32	W	22	extreme values	0.5	0	0	2	1500	1140	1400	-24	random number
33	M	24	extreme values	0.05	0	0	2	650	490	650	-24	random number
34	W	27	extreme values	0.6	0	0	2	1800	1360	1800	-24	random number
35	W	30	extreme values	0.5	0	0.25	2	345	260	345	-24	random number
36	W	20	extreme values	0.85	0.1	0.5	2	2800	2120	2500	-24	random number
37	W	24	extreme values	0.2	0	0.3	2	4000	3040	3480	-24	random number
38	W	21	extreme values	0.7	0.05	0	2	1400	1060	1400	-24	random number
39	M	21	extreme values	0.55	0.05	0	2	900	680	900	-24	random number
40	W	22	extreme values	0.8	0.4	0.1	2	2400	1820	2400	-24	random number
41	M	21	extreme values	0.7	0.15	0.1	2	4500	3420	4000	-24	random number
42	M	21	extreme values	0.25	0.1	0	2	900	680	935	-24	random number
43	M	22	extreme values	0.6	-0.1	0	2	2700	2050	2700	-24	random number
44	W	NA	extreme values	0.2	0	0	2	800	600	800	-24	random number
45	M	23	extreme values	0.7	0	0	2	1980	1500	1980	-24	random number
46	W	23	extreme values	0.93	0.27	0.5	2	4000	3040	3500	-24	random number
47	M	21	extreme values	0.4	0.05	0.05	2	2200	1670	2200	-24	random number
48	W	21	extreme values	0.8	0.2	0.1	2	5600	4250	5600	-24	random number
49	W	23	no extreme values	0.7	0.1	0.2	2	800	600	800	-24	random number
50	M	21	no extreme values	0.5	0.05	0	2	2500	1900	2500	-24	random number
51	W	25	no extreme values	0.3	0.45	0.1	2	3500	2660	3250	-24	random number
52	M	25	no extreme values	0.45	-1	0.5	2	800	600	750	-24	random number
53	W	24	no extreme values	0.7	0	0	2	760	570	750	-24	random number
54	W	25	no extreme values	0.7	0.35	0	2	1200	910	1200	-24	random number
55	W	25	no extreme values	0.8	-0.2	0	2	620	470	620	-24	random number
56	W	27	no extreme values	0.9	0.4	0.6	2	3800	2880	3800	-24	random number
57	W	25	no extreme values	0.8	0.1	0	2	4320	3280	4320	-24	random number
58	W	25	no extreme values	0.3	0.05	0.05	2	4286	3250	4286	-24	random number
59	M	24	no extreme values	0.75	0.05	0	2	500	380	NA	-24	random number
60	M	31	no extreme values	0.85	0.45	0.5	2	450	340	400	-24	random number
61	W	NA	no extreme values	0.5	0.05	0	2	1850	1400	1850	-24	random number
62	W	24	no extreme values	0.5	0.5	0	2	15000	11400	16000	-24	random number
63	W	NA	no extreme values	0.6	0.35	0	2	2500	1900	2500	-24	random number
64	W	26	no extreme values	0.5	0.5	0.5	2	500	380	500	-24	random number
65	W	24	no extreme values	0.5	0.3	0.1	2	1900	1440	1900	-24	random number
66	W	20	no extreme values	0.5	0.7	0	2	2000	1520	1800	-24	random number
67	W	21	no extreme values	0.8	0.5	0	2	1800	1360	1800	-24	random number
68	W	25	no extreme values	0.75	-0.1	0	2	780	590	700	-24	random number
69	W	21	no extreme values	0.7	0.4	0.5	2	1500	1140	1500	-24	random number
70	W	22	no extreme values	0.8	0	0	2	600	450	600	-24	random number
71	M	23	no extreme values	0.8	0.2	0	2	1560	1180	1560	-24	random number
72	W	28	no extreme values	0.75	0.07	0.35	2	2806	2130	2800	-24	random number
73	W	27	no extreme values	0.9	0.2	0	2	6500	4940	6500	-24	random number
74	W	21	no extreme values	0.8	0.2	0.3	2	1500	1140	1500	-24	random number
75	M	26	no extreme values	0.6	0.1	0	2	1400	1060	1300	-24	random number
76	W	24	no extreme values	0.5	0.05	0.05	2	2789	2110	2500	-24	random number
77	M	27	no extreme values	0.3	0	0	2	2500	1900	2500	-24	random number
78	M	35	no extreme values	0.5	0.3	0.05	2	3800	2880	3200	-24	random number
79	W	26	no extreme values	0.6	0.2	-0.5	2	2500	1900	2500	-24	random number
80	W	22	no extreme values	0.8	0	0.2	2	1569	1190	1569	-24	random number
81	W	26	no extreme values	0.35	0.5	0.5	2	4700	3570	4700	-24	random number
82	W	24	no extreme values	0.5	0	0	2	3700	2810	3700	-24	random number
83	M	22	no extreme values	0.6	0.2	0	2	1700	1290	1700	-24	random number
84	W	22	no extreme values	0.8	0.1	0	2	1200	910	1200	-24	random number
85	W	23	no extreme values	0.5	-0.1	0	2	2600	1970	2600	-24	random number
86	W	22	no extreme values	0.69	0.3	0.3	2	3100	2350	2800	-24	random number
87	W	22	no extreme values	0.4	0.2	0	2	2000	1520	2000	-24	random number
88	W	23	no extreme values	0.5	0.1	0	2	1500	1140	1500	-24	random number
89	W	22	no extreme values	0.6	-0.1	0	2	1200	910	1200	-24	random number
90	W	22	no extreme values	0.25	-0.25	0.05	2	3600	2730	3400	-24	random number
91	W	24	no extreme values	0.7	0	0	2	1200	910	1200	-24	random number
92	W	20	no extreme values	0.5	0.1	0	2	3000	2280	2658	-24	random number
93	W	26	no extreme values	0.25	-0.1	0	2	2500	1900	2500	-24	random number
94	W	21	no extreme values	0.25	0.25	0	2	5540	4210	5540	-24	random number
95	W	25	no extreme values	0.7	0.5	0.1	2	1100	830	1100	-24	random number
96	W	25	no extreme values	0.6	0.2	0.1	2	900	680	900	-24	random number
97	W	25	no extreme values	0.75	0.5	0	2	1400	1060	1400	-24	random number
98	W	26	no extreme values	0.7	0.1	0.2	2	1200	910	1200	-24	random number
99	M	23	no extreme values	0.4	0.02	0	2	1200	910	1200	-24	random number
1	M	21	extreme values	0.7	-0.1	0	3	800	970	800	22	somewhat competent
2	W	22	extreme values	0.8	0.3	0	3	3500	4270	3800	22	somewhat competent
3	W	20	extreme values	0.5	0.2	0.2	3	500	610	500	22	somewhat competent
4	W	26	extreme values	NA	NA	0	3	1000	1220	1000	22	somewhat competent
5	M	27	extreme values	0.15	0.05	0	3	1600	1950	1600	22	somewhat competent
6	W	25	extreme values	0.5	0.1	0	3	2500	3050	2900	22	somewhat competent
7	W	33	extreme values	0.5	0.1	0.1	3	2800	3410	2900	22	somewhat competent
8	W	26	extreme values	0.9	0.2	0	3	1000	1220	1000	22	somewhat competent
9	W	21	extreme values	0.65	0.1	0.35	3	1600	1950	1600	22	somewhat competent
10	W	24	extreme values	0.6	0.2	0	3	1950	2370	1950	22	somewhat competent
11	W	27	extreme values	0.75	0.1	0.35	3	5200	6340	5200	22	somewhat competent
12	W	26	extreme values	0.7	0.1	0	3	800	970	1000	22	somewhat competent
13	W	23	extreme values	0.65	0.2	0	3	1700	2070	1800	22	somewhat competent
14	W	27	extreme values	0.6	0.05	0	3	900	1090	900	22	somewhat competent
15	W	27	extreme values	0.8	0.2	0.1	3	560	680	570	22	somewhat competent
16	M	21	extreme values	0.65	0.5	0	3	1860	2260	1860	22	somewhat competent
17	W	21	extreme values	0.9	-0.1	0	3	4600	5610	4600	22	somewhat competent
18	M	25	extreme values	0.75	0.2	0	3	1900	2310	2000	22	somewhat competent
19	W	24	extreme values	0.5	0.25	0.25	3	6782	3200	5632	22	somewhat competent
20	W	26	extreme values	0.75	0	0	3	2500	3050	2500	22	somewhat competent
21	W	20	extreme values	0.7	0.1	0	3	660	800	750	22	somewhat competent
22	W	24	extreme values	0.75	0.3	0	3	1900	2310	2000	22	somewhat competent
23	W	21	extreme values	0.7	0.1	0	3	980	1190	1090	22	somewhat competent
24	W	21	extreme values	0.6	0.2	0	3	1900	2310	1900	22	somewhat competent
25	W	25	extreme values	0.5	0.3	0.01	3	2500	3050	NA	22	somewhat competent
26	W	30	extreme values	0.6	0	0	3	1500	1830	1500	22	somewhat competent
27	W	29	extreme values	0.7	0.1	0	3	650	790	690	22	somewhat competent
28	W	24	extreme values	0.65	0.3	0	3	2550	3110	2550	22	somewhat competent
29	M	29	extreme values	0.3	0.1	0	3	400	480	450	22	somewhat competent
30	M	24	extreme values	0.65	0.2	0	3	2400	2920	2450	22	somewhat competent
31	M	23	extreme values	0.75	-0.2	0	3	2300	2800	2300	22	somewhat competent
32	W	22	extreme values	0.5	0	0	3	1300	1580	1300	22	somewhat competent
33	M	24	extreme values	0.05	0	0	3	NA	800	NA	22	somewhat competent
34	W	27	extreme values	0.6	0	0	3	950	1150	950	22	somewhat competent
35	W	30	extreme values	0.5	0	0.25	3	800	970	850	22	somewhat competent
36	W	20	extreme values	0.85	0.1	0.5	3	1400	1700	1100	22	somewhat competent
37	W	24	extreme values	0.2	0	0.3	3	1500	1830	1720	22	somewhat competent
38	W	21	extreme values	0.7	0.05	0	3	320	390	300	22	somewhat competent
39	M	21	extreme values	0.55	0.05	0	3	1100	1340	1300	22	somewhat competent
40	W	22	extreme values	0.8	0.4	0.1	3	2000	2440	2000	22	somewhat competent
41	M	21	extreme values	0.7	0.15	0.1	3	3500	4270	3500	22	somewhat competent
42	M	21	extreme values	0.25	0.1	0	3	3000	3660	NA	22	somewhat competent
43	M	22	extreme values	0.6	-0.1	0	3	2000	2440	2700	22	somewhat competent
44	W	NA	extreme values	0.2	0	0	3	700	850	700	22	somewhat competent
45	M	23	extreme values	0.7	0	0	3	1100	1340	1100	22	somewhat competent
46	W	23	extreme values	0.93	0.27	0.5	3	3000	3660	3000	22	somewhat competent
47	M	21	extreme values	0.4	0.05	0.05	3	3500	4270	3600	22	somewhat competent
48	W	21	extreme values	0.8	0.2	0.1	3	6000	7320	6000	22	somewhat competent
49	W	23	no extreme values	0.7	0.1	0.2	3	850	1030	920	22	somewhat competent
50	M	21	no extreme values	0.5	0.05	0	3	3600	4390	3100	22	somewhat competent
51	W	25	no extreme values	0.3	0.45	0.1	3	2600	3170	2999	22	somewhat competent
52	M	25	no extreme values	0.45	-1	0.5	3	800	970	800	22	somewhat competent
53	W	24	no extreme values	0.7	0	0	3	700	850	899	22	somewhat competent
54	W	25	no extreme values	0.7	0.35	0	3	1300	1580	1300	22	somewhat competent
55	W	25	no extreme values	0.8	-0.2	0	3	700	850	700	22	somewhat competent
56	W	27	no extreme values	0.9	0.4	0.6	3	2140	2610	2140	22	somewhat competent
57	W	25	no extreme values	0.8	0.1	0	3	4950	6030	5280	22	somewhat competent
58	W	25	no extreme values	0.3	0.05	0.05	3	1590	1930	1590	22	somewhat competent
59	M	24	no extreme values	0.75	0.05	0	3	550	670	NA	22	somewhat competent
60	M	31	no extreme values	0.85	0.45	0.5	3	450	540	450	22	somewhat competent
61	W	NA	no extreme values	0.5	0.05	0	3	2200	2680	2200	22	somewhat competent
62	W	24	no extreme values	0.5	0.5	0	3	12000	600	10000	22	somewhat competent
63	W	NA	no extreme values	0.6	0.35	0	3	1800	2190	1900	22	somewhat competent
64	W	26	no extreme values	0.5	0.5	0.5	3	400	480	400	22	somewhat competent
65	W	24	no extreme values	0.5	0.3	0.1	3	1300	1580	1360	22	somewhat competent
66	W	20	no extreme values	0.5	0.7	0	3	3000	3660	2800	22	somewhat competent
67	W	21	no extreme values	0.8	0.5	0	3	900	1090	780	22	somewhat competent
68	W	25	no extreme values	0.75	-0.1	0	3	690	840	690	22	somewhat competent
69	W	21	no extreme values	0.7	0.4	0.5	3	3000	3660	3060	22	somewhat competent
70	W	22	no extreme values	0.8	0	0	3	900	1090	950	22	somewhat competent
71	M	23	no extreme values	0.8	0.2	0	3	815	990	820	22	somewhat competent
72	W	28	no extreme values	0.75	0.07	0.35	3	899	1090	899	22	somewhat competent
73	W	27	no extreme values	0.9	0.2	0	3	4000	4880	4300	22	somewhat competent
74	W	21	no extreme values	0.8	0.2	0.3	3	900	1090	800	22	somewhat competent
75	M	26	no extreme values	0.6	0.1	0	3	1500	1830	1600	22	somewhat competent
76	W	24	no extreme values	0.5	0.05	0.05	3	955	1160	955	22	somewhat competent
77	M	27	no extreme values	0.3	0	0	3	2000	2440	2000	22	somewhat competent
78	M	35	no extreme values	0.5	0.3	0.05	3	1750	2130	1750	22	somewhat competent
79	W	26	no extreme values	0.6	0.2	-0.5	3	500	610	500	22	somewhat competent
80	W	22	no extreme values	0.8	0	0.2	3	3695	4500	2145	22	somewhat competent
81	W	26	no extreme values	0.35	0.5	0.5	3	2800	3410	2700	22	somewhat competent
82	W	24	no extreme values	0.5	0	0	3	NA	900	1800	22	somewhat competent
83	M	22	no extreme values	0.6	0.2	0	3	1500	1830	1500	22	somewhat competent
84	W	22	no extreme values	0.8	0.1	0	3	1300	1580	1300	22	somewhat competent
85	W	23	no extreme values	0.5	-0.1	0	3	2800	3410	2800	22	somewhat competent
86	W	22	no extreme values	0.69	0.3	0.3	3	2900	3530	2879	22	somewhat competent
87	W	22	no extreme values	0.4	0.2	0	3	2400	2920	2470	22	somewhat competent
88	W	23	no extreme values	0.5	0.1	0	3	2500	3050	2800	22	somewhat competent
89	W	22	no extreme values	0.6	-0.1	0	3	650	790	700	22	somewhat competent
90	W	22	no extreme values	0.25	-0.25	0.05	3	4000	4880	4100	22	somewhat competent
91	W	24	no extreme values	0.7	0	0	3	1400	1700	1400	22	somewhat competent
92	W	20	no extreme values	0.5	0.1	0	3	3350	4080	NA	22	somewhat competent
93	W	26	no extreme values	0.25	-0.1	0	3	3500	4270	3500	22	somewhat competent
94	W	21	no extreme values	0.25	0.25	0	3	6000	7320	6100	22	somewhat competent
95	W	25	no extreme values	0.7	0.5	0.1	3	1800	2190	1800	22	somewhat competent
96	W	25	no extreme values	0.6	0.2	0.1	3	2200	2680	2200	22	somewhat competent
97	W	25	no extreme values	0.75	0.5	0	3	700	850	730	22	somewhat competent
98	W	26	no extreme values	0.7	0.1	0.2	3	2400	2920	2500	22	somewhat competent
99	M	23	no extreme values	0.4	0.02	0	3	890	1080	890	22	somewhat competent
1	M	21	extreme values	0.7	-0.1	0	4	1100	1430	1200	30	competent
2	W	22	extreme values	0.8	0.3	0	4	1800	2340	2000	30	competent
3	W	20	extreme values	0.5	0.2	0.2	4	600	780	700	30	competent
4	W	26	extreme values	NA	NA	0	4	1000	1300	1300	30	competent
5	M	27	extreme values	0.15	0.05	0	4	1200	1560	1300	30	competent
6	W	25	extreme values	0.5	0.1	0	4	3600	4680	4380	30	competent
7	W	33	extreme values	0.5	0.1	0.1	4	1500	1950	1700	30	competent
8	W	26	extreme values	0.9	0.2	0	4	2200	2860	2500	30	competent
9	W	21	extreme values	0.65	0.1	0.35	4	1200	1560	1300	30	competent
10	W	24	extreme values	0.6	0.2	0	4	1800	2340	2000	30	competent
11	W	27	extreme values	0.75	0.1	0.35	4	3700	4810	4500	30	competent
12	W	26	extreme values	0.7	0.1	0	4	1300	1690	1400	30	competent
13	W	23	extreme values	0.65	0.2	0	4	800	1040	970	30	competent
14	W	27	extreme values	0.6	0.05	0	4	1100	1430	1350	30	competent
15	W	27	extreme values	0.8	0.2	0.1	4	1200	1560	1300	30	competent
16	M	21	extreme values	0.65	0.5	0	4	1230	1590	1500	30	competent
17	W	21	extreme values	0.9	-0.1	0	4	3100	4030	3700	30	competent
18	M	25	extreme values	0.75	0.2	0	4	2120	2750	2320	30	competent
19	W	24	extreme values	0.5	0.25	0.25	4	5628	7310	6450	30	competent
20	W	26	extreme values	0.75	0	0	4	1200	1560	1300	30	competent
21	W	20	extreme values	0.7	0.1	0	4	760	980	860	30	competent
22	W	24	extreme values	0.75	0.3	0	4	2200	2860	2500	30	competent
23	W	21	extreme values	0.7	0.1	0	4	1330	1720	1600	30	competent
24	W	21	extreme values	0.6	0.2	0	4	1000	1300	1100	30	competent
25	W	25	extreme values	0.5	0.3	0.01	4	7000	1900	5000	30	competent
26	W	30	extreme values	0.6	0	0	4	3500	4550	4500	30	competent
27	W	29	extreme values	0.7	0.1	0	4	850	1100	950	30	competent
28	W	24	extreme values	0.65	0.3	0	4	3900	5070	5230	30	competent
29	M	29	extreme values	0.3	0.1	0	4	400	520	500	30	competent
30	M	24	extreme values	0.65	0.2	0	4	3900	5070	4800	30	competent
31	M	23	extreme values	0.75	-0.2	0	4	2500	3250	2800	30	competent
32	W	22	extreme values	0.5	0	0	4	1400	1820	1680	30	competent
33	M	24	extreme values	0.05	0	0	4	790	1020	790	30	competent
34	W	27	extreme values	0.6	0	0	4	NA	2400	1200	30	competent
35	W	30	extreme values	0.5	0	0.25	4	200	260	250	30	competent
36	W	20	extreme values	0.85	0.1	0.5	4	1100	1430	1420	30	competent
37	W	24	extreme values	0.2	0	0.3	4	2315	3000	2415	30	competent
38	W	21	extreme values	0.7	0.05	0	4	800	1040	1000	30	competent
39	M	21	extreme values	0.55	0.05	0	4	1500	1950	1650	30	competent
40	W	22	extreme values	0.8	0.4	0.1	4	1100	1430	1300	30	competent
41	M	21	extreme values	0.7	0.15	0.1	4	4083	5300	5085	30	competent
42	M	21	extreme values	0.25	0.1	0	4	3000	3900	3400	30	competent
43	M	22	extreme values	0.6	-0.1	0	4	700	910	850	30	competent
44	W	NA	extreme values	0.2	0	0	4	950	1230	1000	30	competent
45	M	23	extreme values	0.7	0	0	4	1400	1820	1600	30	competent
46	W	23	extreme values	0.93	0.27	0.5	4	5000	6500	6000	30	competent
47	M	21	extreme values	0.4	0.05	0.05	4	4000	5200	4800	30	competent
48	W	21	extreme values	0.8	0.2	0.1	4	5500	7150	6000	30	competent
49	W	23	no extreme values	0.7	0.1	0.2	4	1700	2210	2200	30	competent
50	M	21	no extreme values	0.5	0.05	0	4	1800	2340	2150	30	competent
51	W	25	no extreme values	0.3	0.45	0.1	4	3000	3900	3050	30	competent
52	M	25	no extreme values	0.45	-1	0.5	4	700	910	805	30	competent
53	W	24	no extreme values	0.7	0	0	4	500	650	640	30	competent
54	W	25	no extreme values	0.7	0.35	0	4	1500	1950	1800	30	competent
55	W	25	no extreme values	0.8	-0.2	0	4	590	760	720	30	competent
56	W	27	no extreme values	0.9	0.4	0.6	4	2200	2860	2500	30	competent
57	W	25	no extreme values	0.8	0.1	0	4	4300	5590	5250	30	competent
58	W	25	no extreme values	0.3	0.05	0.05	4	1400	1820	1490	30	competent
59	M	24	no extreme values	0.75	0.05	0	4	560	720	675	30	competent
60	M	31	no extreme values	0.85	0.45	0.5	4	600	780	700	30	competent
61	W	NA	no extreme values	0.5	0.05	0	4	1640	2130	1740	30	competent
62	W	24	no extreme values	0.5	0.5	0	4	8000	2400	7000	30	competent
63	W	NA	no extreme values	0.6	0.35	0	4	1950	2530	2300	30	competent
64	W	26	no extreme values	0.5	0.5	0.5	4	450	580	500	30	competent
65	W	24	no extreme values	0.5	0.3	0.1	4	2250	2920	2700	30	competent
66	W	20	no extreme values	0.5	0.7	0	4	3800	4940	4500	30	competent
67	W	21	no extreme values	0.8	0.5	0	4	1900	2470	2400	30	competent
68	W	25	no extreme values	0.75	-0.1	0	4	870	1130	950	30	competent
69	W	21	no extreme values	0.7	0.4	0.5	4	1000	1300	1300	30	competent
70	W	22	no extreme values	0.8	0	0	4	920	1190	1100	30	competent
71	M	23	no extreme values	0.8	0.2	0	4	475	610	550	30	competent
72	W	28	no extreme values	0.75	0.07	0.35	4	1048	1360	1298	30	competent
73	W	27	no extreme values	0.9	0.2	0	4	2500	3250	3150	30	competent
74	W	21	no extreme values	0.8	0.2	0.3	4	1200	1560	1600	30	competent
75	M	26	no extreme values	0.6	0.1	0	4	1200	1560	NA	30	competent
76	W	24	no extreme values	0.5	0.05	0.05	4	1490	1930	1800	30	competent
77	M	27	no extreme values	0.3	0	0	4	2000	2600	2000	30	competent
78	M	35	no extreme values	0.5	0.3	0.05	4	1900	2470	1950	30	competent
79	W	26	no extreme values	0.6	0.2	-0.5	4	600	780	700	30	competent
80	W	22	no extreme values	0.8	0	0.2	4	4269	5540	5540	30	competent
81	W	26	no extreme values	0.35	0.5	0.5	4	1700	2210	2000	30	competent
82	W	24	no extreme values	0.5	0	0	4	3500	4550	4300	30	competent
83	M	22	no extreme values	0.6	0.2	0	4	1000	1300	1200	30	competent
84	W	22	no extreme values	0.8	0.1	0	4	1000	1300	1200	30	competent
85	W	23	no extreme values	0.5	-0.1	0	4	1980	2570	2000	30	competent
86	W	22	no extreme values	0.69	0.3	0.3	4	1699	2200	1890	30	competent
87	W	22	no extreme values	0.4	0.2	0	4	1970	2560	2200	30	competent
88	W	23	no extreme values	0.5	0.1	0	4	1500	1950	2000	30	competent
89	W	22	no extreme values	0.6	-0.1	0	4	850	1100	1000	30	competent
90	W	22	no extreme values	0.25	-0.25	0.05	4	3200	4160	3900	30	competent
91	W	24	no extreme values	0.7	0	0	4	1000	1300	1200	30	competent
92	W	20	no extreme values	0.5	0.1	0	4	2568	3330	2750	30	competent
93	W	26	no extreme values	0.25	-0.1	0	4	1230	1590	1430	30	competent
94	W	21	no extreme values	0.25	0.25	0	4	7330	2500	4000	30	competent
95	W	25	no extreme values	0.7	0.5	0.1	4	1650	2140	1900	30	competent
96	W	25	no extreme values	0.6	0.2	0.1	4	2600	3380	3000	30	competent
97	W	25	no extreme values	0.75	0.5	0	4	690	890	800	30	competent
98	W	26	no extreme values	0.7	0.1	0.2	4	2300	2990	2600	30	competent
99	M	23	no extreme values	0.4	0.02	0	4	1830	2370	2100	30	competent
1	M	21	extreme values	0.7	-0.1	0	5	350	460	400	32	competent
2	W	22	extreme values	0.8	0.3	0	5	400	520	500	32	competent
3	W	20	extreme values	0.5	0.2	0.2	5	300	390	350	32	competent
4	W	26	extreme values	NA	NA	0	5	400	520	400	32	competent
5	M	27	extreme values	0.15	0.05	0	5	400	520	450	32	competent
6	W	25	extreme values	0.5	0.1	0	5	650	850	850	32	competent
7	W	33	extreme values	0.5	0.1	0.1	5	580	760	580	32	competent
8	W	26	extreme values	0.9	0.2	0	5	500	660	550	32	competent
9	W	21	extreme values	0.65	0.1	0.35	5	500	660	550	32	competent
10	W	24	extreme values	0.6	0.2	0	5	600	790	650	32	competent
11	W	27	extreme values	0.75	0.1	0.35	5	2700	3560	3200	32	competent
12	W	26	extreme values	0.7	0.1	0	5	600	790	600	32	competent
13	W	23	extreme values	0.65	0.2	0	5	760	1000	880	32	competent
14	W	27	extreme values	0.6	0.05	0	5	600	790	710	32	competent
15	W	27	extreme values	0.8	0.2	0.1	5	600	790	650	32	competent
16	M	21	extreme values	0.65	0.5	0	5	500	660	550	32	competent
17	W	21	extreme values	0.9	-0.1	0	5	1010	1330	1010	32	competent
18	M	25	extreme values	0.75	0.2	0	5	900	1180	900	32	competent
19	W	24	extreme values	0.5	0.25	0.25	5	500	660	550	32	competent
20	W	26	extreme values	0.75	0	0	5	500	660	500	32	competent
21	W	20	extreme values	0.7	0.1	0	5	490	640	520	32	competent
22	W	24	extreme values	0.75	0.3	0	5	750	990	800	32	competent
23	W	21	extreme values	0.7	0.1	0	5	450	590	550	32	competent
24	W	21	extreme values	0.6	0.2	0	5	200	260	220	32	competent
25	W	25	extreme values	0.5	0.3	0.01	5	3000	3960	3500	32	competent
26	W	30	extreme values	0.6	0	0	5	800	1050	900	32	competent
27	W	29	extreme values	0.7	0.1	0	5	450	590	550	32	competent
28	W	24	extreme values	0.65	0.3	0	5	900	1180	1020	32	competent
29	M	29	extreme values	0.3	0.1	0	5	200	260	250	32	competent
30	M	24	extreme values	0.65	0.2	0	5	800	1050	860	32	competent
31	M	23	extreme values	0.75	-0.2	0	5	400	520	420	32	competent
32	W	22	extreme values	0.5	0	0	5	1000	1320	1100	32	competent
33	M	24	extreme values	0.05	0	0	5	400	520	400	32	competent
34	W	27	extreme values	0.6	0	0	5	800	1050	800	32	competent
35	W	30	extreme values	0.5	0	0.25	5	200	260	245	32	competent
36	W	20	extreme values	0.85	0.1	0.5	5	800	1050	900	32	competent
37	W	24	extreme values	0.2	0	0.3	5	500	660	550	32	competent
38	W	21	extreme values	0.7	0.05	0	5	400	520	500	32	competent
39	M	21	extreme values	0.55	0.05	0	5	350	460	NA	32	competent
40	W	22	extreme values	0.8	0.4	0.1	5	1000	1320	1100	32	competent
41	M	21	extreme values	0.7	0.15	0.1	5	1200	1580	1355	32	competent
42	M	21	extreme values	0.25	0.1	0	5	600	790	700	32	competent
43	M	22	extreme values	0.6	-0.1	0	5	400	520	450	32	competent
44	W	NA	extreme values	0.2	0	0	5	200	260	200	32	competent
45	M	23	extreme values	0.7	0	0	5	510	670	590	32	competent
46	W	23	extreme values	0.93	0.27	0.5	5	2500	3300	3000	32	competent
47	M	21	extreme values	0.4	0.05	0.05	5	700	920	800	32	competent
48	W	21	extreme values	0.8	0.2	0.1	5	6000	3500	4000	32	competent
49	W	23	no extreme values	0.7	0.1	0.2	5	350	460	400	32	competent
50	M	21	no extreme values	0.5	0.05	0	5	600	790	650	32	competent
51	W	25	no extreme values	0.3	0.45	0.1	5	800	1050	600	32	competent
52	M	25	no extreme values	0.45	-1	0.5	5	200	260	230	32	competent
53	W	24	no extreme values	0.7	0	0	5	260	340	300	32	competent
54	W	25	no extreme values	0.7	0.35	0	5	500	660	600	32	competent
55	W	25	no extreme values	0.8	-0.2	0	5	400	520	470	32	competent
56	W	27	no extreme values	0.9	0.4	0.6	5	970	1280	1000	32	competent
57	W	25	no extreme values	0.8	0.1	0	5	2100	2770	2500	32	competent
58	W	25	no extreme values	0.3	0.05	0.05	5	520	680	NA	32	competent
59	M	24	no extreme values	0.75	0.05	0	5	NA	190	NA	32	competent
60	M	31	no extreme values	0.85	0.45	0.5	5	300	390	350	32	competent
61	W	NA	no extreme values	0.5	0.05	0	5	460	600	NA	32	competent
62	W	24	no extreme values	0.5	0.5	0	5	1500	1980	1600	32	competent
63	W	NA	no extreme values	0.6	0.35	0	5	350	460	400	32	competent
64	W	26	no extreme values	0.5	0.5	0.5	5	200	260	250	32	competent
65	W	24	no extreme values	0.5	0.3	0.1	5	700	920	700	32	competent
66	W	20	no extreme values	0.5	0.7	0	5	3000	3960	3450	32	competent
67	W	21	no extreme values	0.8	0.5	0	5	550	720	650	32	competent
68	W	25	no extreme values	0.75	-0.1	0	5	300	390	340	32	competent
69	W	21	no extreme values	0.7	0.4	0.5	5	900	1180	1000	32	competent
70	W	22	no extreme values	0.8	0	0	5	300	390	300	32	competent
71	M	23	no extreme values	0.8	0.2	0	5	275	360	340	32	competent
72	W	28	no extreme values	0.75	0.07	0.35	5	408	530	489	32	competent
73	W	27	no extreme values	0.9	0.2	0	5	1000	1320	1300	32	competent
74	W	21	no extreme values	0.8	0.2	0.3	5	750	990	850	32	competent
75	M	26	no extreme values	0.6	0.1	0	5	350	460	400	32	competent
76	W	24	no extreme values	0.5	0.05	0.05	5	543	710	650	32	competent
77	M	27	no extreme values	0.3	0	0	5	400	520	400	32	competent
78	M	35	no extreme values	0.5	0.3	0.05	5	650	850	650	32	competent
79	W	26	no extreme values	0.6	0.2	-0.5	5	300	390	350	32	competent
80	W	22	no extreme values	0.8	0	0.2	5	965	1270	1000	32	competent
81	W	26	no extreme values	0.35	0.5	0.5	5	1200	1580	1200	32	competent
82	W	24	no extreme values	0.5	0	0	5	1800	2370	2000	32	competent
83	M	22	no extreme values	0.6	0.2	0	5	700	920	820	32	competent
84	W	22	no extreme values	0.8	0.1	0	5	NA	110	NA	32	competent
85	W	23	no extreme values	0.5	-0.1	0	5	700	920	750	32	competent
86	W	22	no extreme values	0.69	0.3	0.3	5	489	640	589	32	competent
87	W	22	no extreme values	0.4	0.2	0	5	400	520	450	32	competent
88	W	23	no extreme values	0.5	0.1	0	5	500	660	700	32	competent
89	W	22	no extreme values	0.6	-0.1	0	5	300	390	320	32	competent
90	W	22	no extreme values	0.25	-0.25	0.05	5	900	1180	1100	32	competent
91	W	24	no extreme values	0.7	0	0	5	500	660	600	32	competent
92	W	20	no extreme values	0.5	0.1	0	5	1000	1320	1150	32	competent
93	W	26	no extreme values	0.25	-0.1	0	5	400	520	425	32	competent
94	W	21	no extreme values	0.25	0.25	0	5	800	1050	950	32	competent
95	W	25	no extreme values	0.7	0.5	0.1	5	1700	2240	1500	32	competent
96	W	25	no extreme values	0.6	0.2	0.1	5	800	1050	850	32	competent
97	W	25	no extreme values	0.75	0.5	0	5	680	890	780	32	competent
98	W	26	no extreme values	0.7	0.1	0.2	5	600	790	650	32	competent
99	M	23	no extreme values	0.4	0.02	0	5	260	340	300	32	competent
1	M	21	extreme values	0.7	-0.1	0	6	400	480	350	20	somewhat competent
2	W	22	extreme values	0.8	0.3	0	6	1200	1440	1200	20	somewhat competent
3	W	20	extreme values	0.5	0.2	0.2	6	320	380	320	20	somewhat competent
4	W	26	extreme values	NA	NA	0	6	400	480	400	20	somewhat competent
5	M	27	extreme values	0.15	0.05	0	6	800	960	800	20	somewhat competent
6	W	25	extreme values	0.5	0.1	0	6	1920	2300	1640	20	somewhat competent
7	W	33	extreme values	0.5	0.1	0.1	6	800	960	830	20	somewhat competent
8	W	26	extreme values	0.9	0.2	0	6	800	960	800	20	somewhat competent
9	W	21	extreme values	0.65	0.1	0.35	6	400	480	400	20	somewhat competent
10	W	24	extreme values	0.6	0.2	0	6	790	940	750	20	somewhat competent
11	W	27	extreme values	0.75	0.1	0.35	6	2800	3360	2900	20	somewhat competent
12	W	26	extreme values	0.7	0.1	0	6	700	840	700	20	somewhat competent
13	W	23	extreme values	0.65	0.2	0	6	770	920	800	20	somewhat competent
14	W	27	extreme values	0.6	0.05	0	6	360	430	360	20	somewhat competent
15	W	27	extreme values	0.8	0.2	0.1	6	700	840	720	20	somewhat competent
16	M	21	extreme values	0.65	0.5	0	6	611	730	611	20	somewhat competent
17	W	21	extreme values	0.9	-0.1	0	6	2040	2440	2010	20	somewhat competent
18	M	25	extreme values	0.75	0.2	0	6	1600	1920	1700	20	somewhat competent
19	W	24	extreme values	0.5	0.25	0.25	6	3690	4420	4690	20	somewhat competent
20	W	26	extreme values	0.75	0	0	6	800	960	800	20	somewhat competent
21	W	20	extreme values	0.7	0.1	0	6	270	320	290	20	somewhat competent
22	W	24	extreme values	0.75	0.3	0	6	400	480	400	20	somewhat competent
23	W	21	extreme values	0.7	0.1	0	6	480	570	500	20	somewhat competent
24	W	21	extreme values	0.6	0.2	0	6	500	600	500	20	somewhat competent
25	W	25	extreme values	0.5	0.3	0.01	6	1500	1800	1500	20	somewhat competent
26	W	30	extreme values	0.6	0	0	6	700	840	900	20	somewhat competent
27	W	29	extreme values	0.7	0.1	0	6	450	540	400	20	somewhat competent
28	W	24	extreme values	0.65	0.3	0	6	600	720	600	20	somewhat competent
29	M	29	extreme values	0.3	0.1	0	6	390	460	450	20	somewhat competent
30	M	24	extreme values	0.65	0.2	0	6	NA	1100	890	20	somewhat competent
31	M	23	extreme values	0.75	-0.2	0	6	800	960	700	20	somewhat competent
32	W	22	extreme values	0.5	0	0	6	1600	1920	1600	20	somewhat competent
33	M	24	extreme values	0.05	0	0	6	450	540	450	20	somewhat competent
34	W	27	extreme values	0.6	0	0	6	900	1080	900	20	somewhat competent
35	W	30	extreme values	0.5	0	0.25	6	250	300	250	20	somewhat competent
36	W	20	extreme values	0.85	0.1	0.5	6	2000	2400	2000	20	somewhat competent
37	W	24	extreme values	0.2	0	0.3	6	1540	1840	980	20	somewhat competent
38	W	21	extreme values	0.7	0.05	0	6	400	480	400	20	somewhat competent
39	M	21	extreme values	0.55	0.05	0	6	600	720	600	20	somewhat competent
40	W	22	extreme values	0.8	0.4	0.1	6	NA	1800	1600	20	somewhat competent
41	M	21	extreme values	0.7	0.15	0.1	6	1750	2100	1700	20	somewhat competent
42	M	21	extreme values	0.25	0.1	0	6	700	840	700	20	somewhat competent
43	M	22	extreme values	0.6	-0.1	0	6	400	480	400	20	somewhat competent
44	W	NA	extreme values	0.2	0	0	6	250	300	270	20	somewhat competent
45	M	23	extreme values	0.7	0	0	6	510	610	500	20	somewhat competent
46	W	23	extreme values	0.93	0.27	0.5	6	2000	2400	2000	20	somewhat competent
47	M	21	extreme values	0.4	0.05	0.05	6	570	680	570	20	somewhat competent
48	W	21	extreme values	0.8	0.2	0.1	6	1000	1200	1000	20	somewhat competent
49	W	23	no extreme values	0.7	0.1	0.2	6	230	270	300	20	somewhat competent
50	M	21	no extreme values	0.5	0.05	0	6	1100	1320	1100	20	somewhat competent
51	W	25	no extreme values	0.3	0.45	0.1	6	700	840	730	20	somewhat competent
52	M	25	no extreme values	0.45	-1	0.5	6	400	480	400	20	somewhat competent
53	W	24	no extreme values	0.7	0	0	6	500	600	510	20	somewhat competent
54	W	25	no extreme values	0.7	0.35	0	6	800	960	830	20	somewhat competent
55	W	25	no extreme values	0.8	-0.2	0	6	420	500	420	20	somewhat competent
56	W	27	no extreme values	0.9	0.4	0.6	6	2640	3160	2650	20	somewhat competent
57	W	25	no extreme values	0.8	0.1	0	6	3800	4560	3800	20	somewhat competent
58	W	25	no extreme values	0.3	0.05	0.05	6	580	690	580	20	somewhat competent
59	M	24	no extreme values	0.75	0.05	0	6	450	540	NA	20	somewhat competent
60	M	31	no extreme values	0.85	0.45	0.5	6	200	240	270	20	somewhat competent
61	W	NA	no extreme values	0.5	0.05	0	6	520	620	520	20	somewhat competent
62	W	24	no extreme values	0.5	0.5	0	6	1000	1200	1100	20	somewhat competent
63	W	NA	no extreme values	0.6	0.35	0	6	490	580	510	20	somewhat competent
64	W	26	no extreme values	0.5	0.5	0.5	6	NA	140	NA	20	somewhat competent
65	W	24	no extreme values	0.5	0.3	0.1	6	1000	1200	1005	20	somewhat competent
66	W	20	no extreme values	0.5	0.7	0	6	1000	1200	1000	20	somewhat competent
67	W	21	no extreme values	0.8	0.5	0	6	450	540	380	20	somewhat competent
68	W	25	no extreme values	0.75	-0.1	0	6	650	780	700	20	somewhat competent
69	W	21	no extreme values	0.7	0.4	0.5	6	1900	2280	2000	20	somewhat competent
70	W	22	no extreme values	0.8	0	0	6	350	420	380	20	somewhat competent
71	M	23	no extreme values	0.8	0.2	0	6	575	690	580	20	somewhat competent
72	W	28	no extreme values	0.75	0.07	0.35	6	698	830	793	20	somewhat competent
73	W	27	no extreme values	0.9	0.2	0	6	1000	1200	1050	20	somewhat competent
74	W	21	no extreme values	0.8	0.2	0.3	6	1450	1740	1450	20	somewhat competent
75	M	26	no extreme values	0.6	0.1	0	6	750	900	720	20	somewhat competent
76	W	24	no extreme values	0.5	0.05	0.05	6	321	380	321	20	somewhat competent
77	M	27	no extreme values	0.3	0	0	6	500	600	NA	20	somewhat competent
78	M	35	no extreme values	0.5	0.3	0.05	6	1100	1320	1100	20	somewhat competent
79	W	26	no extreme values	0.6	0.2	-0.5	6	1000	1200	900	20	somewhat competent
80	W	22	no extreme values	0.8	0	0.2	6	952	1140	950	20	somewhat competent
81	W	26	no extreme values	0.35	0.5	0.5	6	700	840	470	20	somewhat competent
82	W	24	no extreme values	0.5	0	0	6	1800	2160	1600	20	somewhat competent
83	M	22	no extreme values	0.6	0.2	0	6	1000	1200	1000	20	somewhat competent
84	W	22	no extreme values	0.8	0.1	0	6	600	720	500	20	somewhat competent
85	W	23	no extreme values	0.5	-0.1	0	6	600	720	600	20	somewhat competent
86	W	22	no extreme values	0.69	0.3	0.3	6	798	950	800	20	somewhat competent
87	W	22	no extreme values	0.4	0.2	0	6	600	720	600	20	somewhat competent
88	W	23	no extreme values	0.5	0.1	0	6	800	960	800	20	somewhat competent
89	W	22	no extreme values	0.6	-0.1	0	6	550	660	600	20	somewhat competent
90	W	22	no extreme values	0.25	-0.25	0.05	6	3280	3930	3280	20	somewhat competent
91	W	24	no extreme values	0.7	0	0	6	1000	1200	1000	20	somewhat competent
92	W	20	no extreme values	0.5	0.1	0	6	650	780	680	20	somewhat competent
93	W	26	no extreme values	0.25	-0.1	0	6	1390	1660	1390	20	somewhat competent
94	W	21	no extreme values	0.25	0.25	0	6	800	960	850	20	somewhat competent
95	W	25	no extreme values	0.7	0.5	0.1	6	800	960	800	20	somewhat competent
96	W	25	no extreme values	0.6	0.2	0.1	6	600	720	600	20	somewhat competent
97	W	25	no extreme values	0.75	0.5	0	6	600	720	650	20	somewhat competent
98	W	26	no extreme values	0.7	0.1	0.2	6	500	600	500	20	somewhat competent
99	M	23	no extreme values	0.4	0.02	0	6	380	450	380	20	somewhat competent
1	M	21	extreme values	0.7	-0.1	0	7	300	1650	300	450	random number
2	W	22	extreme values	0.8	0.3	0	7	600	3300	600	450	random number
3	W	20	extreme values	0.5	0.2	0.2	7	250	1370	250	450	random number
4	W	26	extreme values	NA	NA	0	7	300	1650	300	450	random number
5	M	27	extreme values	0.15	0.05	0	7	600	3300	600	450	random number
6	W	25	extreme values	0.5	0.1	0	7	600	3300	750	450	random number
7	W	33	extreme values	0.5	0.1	0.1	7	1000	5500	1000	450	random number
8	W	26	extreme values	0.9	0.2	0	7	700	3850	700	450	random number
9	W	21	extreme values	0.65	0.1	0.35	7	1000	5500	1000	450	random number
10	W	24	extreme values	0.6	0.2	0	7	700	3850	700	450	random number
11	W	27	extreme values	0.75	0.1	0.35	7	2600	14300	2600	450	random number
12	W	26	extreme values	0.7	0.1	0	7	400	2200	400	450	random number
13	W	23	extreme values	0.65	0.2	0	7	350	1920	350	450	random number
14	W	27	extreme values	0.6	0.05	0	7	250	1370	250	450	random number
15	W	27	extreme values	0.8	0.2	0.1	7	200	1100	250	450	random number
16	M	21	extreme values	0.65	0.5	0	7	306	1680	306	450	random number
17	W	21	extreme values	0.9	-0.1	0	7	900	4950	900	450	random number
18	M	25	extreme values	0.75	0.2	0	7	1100	6050	1100	450	random number
19	W	24	extreme values	0.5	0.25	0.25	7	450	2470	450	450	random number
20	W	26	extreme values	0.75	0	0	7	400	2200	400	450	random number
21	W	20	extreme values	0.7	0.1	0	7	300	1650	300	450	random number
22	W	24	extreme values	0.75	0.3	0	7	200	1100	200	450	random number
23	W	21	extreme values	0.7	0.1	0	7	450	2470	600	450	random number
24	W	21	extreme values	0.6	0.2	0	7	NA	550	NA	450	random number
25	W	25	extreme values	0.5	0.3	0.01	7	1200	6600	1200	450	random number
26	W	30	extreme values	0.6	0	0	7	3000	16500	3000	450	random number
27	W	29	extreme values	0.7	0.1	0	7	250	1370	250	450	random number
28	W	24	extreme values	0.65	0.3	0	7	1200	6600	1200	450	random number
29	M	29	extreme values	0.3	0.1	0	7	200	1100	250	450	random number
30	M	24	extreme values	0.65	0.2	0	7	1200	6600	1200	450	random number
31	M	23	extreme values	0.75	-0.2	0	7	500	2750	550	450	random number
32	W	22	extreme values	0.5	0	0	7	800	4400	800	450	random number
33	M	24	extreme values	0.05	0	0	7	300	1650	300	450	random number
34	W	27	extreme values	0.6	0	0	7	NA	0	500	450	random number
35	W	30	extreme values	0.5	0	0.25	7	268	1470	280	450	random number
36	W	20	extreme values	0.85	0.1	0.5	7	900	4950	900	450	random number
37	W	24	extreme values	0.2	0	0.3	7	300	1650	550	450	random number
38	W	21	extreme values	0.7	0.05	0	7	300	1650	300	450	random number
39	M	21	extreme values	0.55	0.05	0	7	700	3850	700	450	random number
40	W	22	extreme values	0.8	0.4	0.1	7	1000	5500	1000	450	random number
41	M	21	extreme values	0.7	0.15	0.1	7	2500	13750	2500	450	random number
42	M	21	extreme values	0.25	0.1	0	7	600	3300	600	450	random number
43	M	22	extreme values	0.6	-0.1	0	7	250	1370	250	450	random number
44	W	NA	extreme values	0.2	0	0	7	250	1370	250	450	random number
45	M	23	extreme values	0.7	0	0	7	600	3300	750	450	random number
46	W	23	extreme values	0.93	0.27	0.5	7	1500	8250	1500	450	random number
47	M	21	extreme values	0.4	0.05	0.05	7	750	4120	1250	450	random number
48	W	21	extreme values	0.8	0.2	0.1	7	750	4120	750	450	random number
49	W	23	no extreme values	0.7	0.1	0.2	7	370	280	370	-23	random number
50	M	21	no extreme values	0.5	0.05	0	7	300	230	300	-23	random number
51	W	25	no extreme values	0.3	0.45	0.1	7	730	560	720	-23	random number
52	M	25	no extreme values	0.45	-1	0.5	7	300	230	300	-23	random number
53	W	24	no extreme values	0.7	0	0	7	380	290	340	-23	random number
54	W	25	no extreme values	0.7	0.35	0	7	640	490	640	-23	random number
55	W	25	no extreme values	0.8	-0.2	0	7	320	240	320	-23	random number
56	W	27	no extreme values	0.9	0.4	0.6	7	440	330	420	-23	random number
57	W	25	no extreme values	0.8	0.1	0	7	2480	1900	2480	-23	random number
58	W	25	no extreme values	0.3	0.05	0.05	7	395	300	395	-23	random number
59	M	24	no extreme values	0.75	0.05	0	7	200	150	NA	-23	random number
60	M	31	no extreme values	0.85	0.45	0.5	7	NA	110	NA	-23	random number
61	W	NA	no extreme values	0.5	0.05	0	7	400	300	400	-23	random number
62	W	24	no extreme values	0.5	0.5	0	7	1800	1380	1500	-23	random number
63	W	NA	no extreme values	0.6	0.35	0	7	450	340	450	-23	random number
64	W	26	no extreme values	0.5	0.5	0.5	7	NA	70	NA	-23	random number
65	W	24	no extreme values	0.5	0.3	0.1	7	300	230	300	-23	random number
66	W	20	no extreme values	0.5	0.7	0	7	1500	1150	1500	-23	random number
67	W	21	no extreme values	0.8	0.5	0	7	NA	130	NA	-23	random number
68	W	25	no extreme values	0.75	-0.1	0	7	200	150	200	-23	random number
69	W	21	no extreme values	0.7	0.4	0.5	7	500	380	500	-23	random number
70	W	22	no extreme values	0.8	0	0	7	260	200	250	-23	random number
71	M	23	no extreme values	0.8	0.2	0	7	410	310	410	-23	random number
72	W	28	no extreme values	0.75	0.07	0.35	7	387	290	320	-23	random number
73	W	27	no extreme values	0.9	0.2	0	7	400	300	400	-23	random number
74	W	21	no extreme values	0.8	0.2	0.3	7	1100	840	NA	-23	random number
75	M	26	no extreme values	0.6	0.1	0	7	280	210	250	-23	random number
76	W	24	no extreme values	0.5	0.05	0.05	7	NA	150	NA	-23	random number
77	M	27	no extreme values	0.3	0	0	7	300	230	300	-23	random number
78	M	35	no extreme values	0.5	0.3	0.05	7	350	260	320	-23	random number
79	W	26	no extreme values	0.6	0.2	-0.5	7	350	260	350	-23	random number
80	W	22	no extreme values	0.8	0	0.2	7	752	570	752	-23	random number
81	W	26	no extreme values	0.35	0.5	0.5	7	400	300	470	-23	random number
82	W	24	no extreme values	0.5	0	0	7	1000	770	1000	-23	random number
83	M	22	no extreme values	0.6	0.2	0	7	800	610	800	-23	random number
84	W	22	no extreme values	0.8	0.1	0	7	200	150	200	-23	random number
85	W	23	no extreme values	0.5	-0.1	0	7	400	300	400	-23	random number
86	W	22	no extreme values	0.69	0.3	0.3	7	500	380	500	-23	random number
87	W	22	no extreme values	0.4	0.2	0	7	750	570	700	-23	random number
88	W	23	no extreme values	0.5	0.1	0	7	NA	70	NA	-23	random number
89	W	22	no extreme values	0.6	-0.1	0	7	450	340	450	-23	random number
90	W	22	no extreme values	0.25	-0.25	0.05	7	1250	960	1200	-23	random number
91	W	24	no extreme values	0.7	0	0	7	500	380	500	-23	random number
92	W	20	no extreme values	0.5	0.1	0	7	NA	110	NA	-23	random number
93	W	26	no extreme values	0.25	-0.1	0	7	400	300	400	-23	random number
94	W	21	no extreme values	0.25	0.25	0	7	321	240	290	-23	random number
95	W	25	no extreme values	0.7	0.5	0.1	7	400	300	410	-23	random number
96	W	25	no extreme values	0.6	0.2	0.1	7	650	500	650	-23	random number
97	W	25	no extreme values	0.75	0.5	0	7	460	350	460	-23	random number
98	W	26	no extreme values	0.7	0.1	0.2	7	600	460	600	-23	random number
99	M	23	no extreme values	0.4	0.02	0	7	370	280	350	-23	random number
1	M	21	extreme values	0.7	-0.1	0	8	400	300	350	-23	competent
2	W	22	extreme values	0.8	0.3	0	8	500	380	400	-23	competent
3	W	20	extreme values	0.5	0.2	0.2	8	450	340	400	-23	competent
4	W	26	extreme values	NA	NA	0	8	280	210	280	-23	competent
5	M	27	extreme values	0.15	0.05	0	8	450	340	400	-23	competent
6	W	25	extreme values	0.5	0.1	0	8	1100	840	900	-23	competent
7	W	33	extreme values	0.5	0.1	0.1	8	400	300	380	-23	competent
8	W	26	extreme values	0.9	0.2	0	8	300	230	250	-23	competent
9	W	21	extreme values	0.65	0.1	0.35	8	500	380	400	-23	competent
10	W	24	extreme values	0.6	0.2	0	8	600	460	500	-23	competent
11	W	27	extreme values	0.75	0.1	0.35	8	2800	2150	2200	-23	competent
12	W	26	extreme values	0.7	0.1	0	8	1000	770	800	-23	competent
13	W	23	extreme values	0.65	0.2	0	8	670	510	550	-23	competent
14	W	27	extreme values	0.6	0.05	0	8	NA	140	NA	-23	competent
15	W	27	extreme values	0.8	0.2	0.1	8	850	650	760	-23	competent
16	M	21	extreme values	0.65	0.5	0	8	880	670	825	-23	competent
17	W	21	extreme values	0.9	-0.1	0	8	1500	1150	1280	-23	competent
18	M	25	extreme values	0.75	0.2	0	8	1050	800	1010	-23	competent
19	W	24	extreme values	0.5	0.25	0.25	8	650	500	600	-23	competent
20	W	26	extreme values	0.75	0	0	8	500	380	400	-23	competent
21	W	20	extreme values	0.7	0.1	0	8	320	240	270	-23	competent
22	W	24	extreme values	0.75	0.3	0	8	340	260	300	-23	competent
23	W	21	extreme values	0.7	0.1	0	8	NA	3500	2000	-23	competent
24	W	21	extreme values	0.6	0.2	0	8	NA	110	NA	-23	competent
25	W	25	extreme values	0.5	0.3	0.01	8	1500	1150	1300	-23	competent
26	W	30	extreme values	0.6	0	0	8	500	380	400	-23	competent
27	W	29	extreme values	0.7	0.1	0	8	250	190	200	-23	competent
28	W	24	extreme values	0.65	0.3	0	8	2400	1840	1960	-23	competent
29	M	29	extreme values	0.3	0.1	0	8	290	220	270	-23	competent
30	M	24	extreme values	0.65	0.2	0	8	800	610	720	-23	competent
31	M	23	extreme values	0.75	-0.2	0	8	700	530	600	-23	competent
32	W	22	extreme values	0.5	0	0	8	1000	770	900	-23	competent
33	M	24	extreme values	0.05	0	0	8	340	260	300	-23	competent
34	W	27	extreme values	0.6	0	0	8	350	260	350	-23	competent
35	W	30	extreme values	0.5	0	0.25	8	400	300	348	-23	competent
36	W	20	extreme values	0.85	0.1	0.5	8	2100	1610	1700	-23	competent
37	W	24	extreme values	0.2	0	0.3	8	350	260	310	-23	competent
38	W	21	extreme values	0.7	0.05	0	8	600	460	500	-23	competent
39	M	21	extreme values	0.55	0.05	0	8	400	300	350	-23	competent
40	W	22	extreme values	0.8	0.4	0.1	8	900	690	800	-23	competent
41	M	21	extreme values	0.7	0.15	0.1	8	1500	1150	1300	-23	competent
42	M	21	extreme values	0.25	0.1	0	8	567	430	500	-23	competent
43	M	22	extreme values	0.6	-0.1	0	8	500	380	400	-23	competent
44	W	NA	extreme values	0.2	0	0	8	400	300	350	-23	competent
45	M	23	extreme values	0.7	0	0	8	230	170	230	-23	competent
46	W	23	extreme values	0.93	0.27	0.5	8	2500	1920	2000	-23	competent
47	M	21	extreme values	0.4	0.05	0.05	8	1150	880	1020	-23	competent
48	W	21	extreme values	0.8	0.2	0.1	8	2650	2040	2650	-23	competent
49	W	23	no extreme values	0.7	0.1	0.2	8	500	380	430	-23	competent
50	M	21	no extreme values	0.5	0.05	0	8	450	340	350	-23	competent
51	W	25	no extreme values	0.3	0.45	0.1	8	650	500	640	-23	competent
52	M	25	no extreme values	0.45	-1	0.5	8	340	260	300	-23	competent
53	W	24	no extreme values	0.7	0	0	8	399	300	340	-23	competent
54	W	25	no extreme values	0.7	0.35	0	8	NA	3100	800	-23	competent
55	W	25	no extreme values	0.8	-0.2	0	8	390	300	320	-23	competent
56	W	27	no extreme values	0.9	0.4	0.6	8	780	600	780	-23	competent
57	W	25	no extreme values	0.8	0.1	0	8	2100	1610	1870	-23	competent
58	W	25	no extreme values	0.3	0.05	0.05	8	932	710	842	-23	competent
59	M	24	no extreme values	0.75	0.05	0	8	200	150	NA	-23	competent
60	M	31	no extreme values	0.85	0.45	0.5	8	NA	140	NA	-23	competent
61	W	NA	no extreme values	0.5	0.05	0	8	430	330	400	-23	competent
62	W	24	no extreme values	0.5	0.5	0	8	1000	770	NA	-23	competent
63	W	NA	no extreme values	0.6	0.35	0	8	700	530	590	-23	competent
64	W	26	no extreme values	0.5	0.5	0.5	8	250	190	200	-23	competent
65	W	24	no extreme values	0.5	0.3	0.1	8	750	570	600	-23	competent
66	W	20	no extreme values	0.5	0.7	0	8	2000	1540	1750	-23	competent
67	W	21	no extreme values	0.8	0.5	0	8	500	380	400	-23	competent
68	W	25	no extreme values	0.75	-0.1	0	8	200	150	NA	-23	competent
69	W	21	no extreme values	0.7	0.4	0.5	8	580	440	500	-23	competent
70	W	22	no extreme values	0.8	0	0	8	250	190	NA	-23	competent
71	M	23	no extreme values	0.8	0.2	0	8	215	160	NA	-23	competent
72	W	28	no extreme values	0.75	0.07	0.35	8	402	300	345	-23	competent
73	W	27	no extreme values	0.9	0.2	0	8	1000	770	800	-23	competent
74	W	21	no extreme values	0.8	0.2	0.3	8	780	600	620	-23	competent
75	M	26	no extreme values	0.6	0.1	0	8	240	180	200	-23	competent
76	W	24	no extreme values	0.5	0.05	0.05	8	278	210	278	-23	competent
77	M	27	no extreme values	0.3	0	0	8	250	190	250	-23	competent
78	M	35	no extreme values	0.5	0.3	0.05	8	420	320	420	-23	competent
79	W	26	no extreme values	0.6	0.2	-0.5	8	NA	110	NA	-23	competent
80	W	22	no extreme values	0.8	0	0.2	8	2156	1660	1826	-23	competent
81	W	26	no extreme values	0.35	0.5	0.5	8	600	460	560	-23	competent
82	W	24	no extreme values	0.5	0	0	8	1450	1110	1300	-23	competent
83	M	22	no extreme values	0.6	0.2	0	8	550	420	480	-23	competent
84	W	22	no extreme values	0.8	0.1	0	8	NA	110	NA	-23	competent
85	W	23	no extreme values	0.5	-0.1	0	8	600	460	500	-23	competent
86	W	22	no extreme values	0.69	0.3	0.3	8	399	300	399	-23	competent
87	W	22	no extreme values	0.4	0.2	0	8	1000	770	880	-23	competent
88	W	23	no extreme values	0.5	0.1	0	8	200	150	NA	-23	competent
89	W	22	no extreme values	0.6	-0.1	0	8	450	340	400	-23	competent
90	W	22	no extreme values	0.25	-0.25	0.05	8	960	730	810	-23	competent
91	W	24	no extreme values	0.7	0	0	8	600	460	500	-23	competent
92	W	20	no extreme values	0.5	0.1	0	8	280	210	280	-23	competent
93	W	26	no extreme values	0.25	-0.1	0	8	1000	770	900	-23	competent
94	W	21	no extreme values	0.25	0.25	0	8	467	350	398	-23	competent
95	W	25	no extreme values	0.7	0.5	0.1	8	300	230	250	-23	competent
96	W	25	no extreme values	0.6	0.2	0.1	8	600	460	550	-23	competent
97	W	25	no extreme values	0.75	0.5	0	8	500	380	400	-23	competent
98	W	26	no extreme values	0.7	0.1	0.2	8	450	340	400	-23	competent
99	M	23	no extreme values	0.4	0.02	0	8	200	150	NA	-23	competent
1	M	21	extreme values	0.7	-0.1	0	9	1300	1630	1300	26	random number
2	W	22	extreme values	0.8	0.3	0	9	3000	3780	3100	26	random number
3	W	20	extreme values	0.5	0.2	0.2	9	500	630	550	26	random number
4	W	26	extreme values	NA	NA	0	9	1000	1260	1000	26	random number
5	M	27	extreme values	0.15	0.05	0	9	2200	2770	2200	26	random number
6	W	25	extreme values	0.5	0.1	0	9	1360	1710	1575	26	random number
7	W	33	extreme values	0.5	0.1	0.1	9	4000	5040	3700	26	random number
8	W	26	extreme values	0.9	0.2	0	9	2000	2520	2000	26	random number
9	W	21	extreme values	0.65	0.1	0.35	9	1800	2260	1700	26	random number
10	W	24	extreme values	0.6	0.2	0	9	2200	2770	2300	26	random number
11	W	27	extreme values	0.75	0.1	0.35	9	5700	7180	5700	26	random number
12	W	26	extreme values	0.7	0.1	0	9	1900	2390	1900	26	random number
13	W	23	extreme values	0.65	0.2	0	9	1550	1950	1550	26	random number
14	W	27	extreme values	0.6	0.05	0	9	1600	2010	1600	26	random number
15	W	27	extreme values	0.8	0.2	0.1	9	1000	1260	1000	26	random number
16	M	21	extreme values	0.65	0.5	0	9	2225	2800	2225	26	random number
17	W	21	extreme values	0.9	-0.1	0	9	4005	5040	4005	26	random number
18	M	25	extreme values	0.75	0.2	0	9	2920	3670	2920	26	random number
19	W	24	extreme values	0.5	0.25	0.25	9	8590	10820	9560	26	random number
20	W	26	extreme values	0.75	0	0	9	3000	3780	3000	26	random number
21	W	20	extreme values	0.7	0.1	0	9	1200	1510	1200	26	random number
22	W	24	extreme values	0.75	0.3	0	9	3250	4090	3250	26	random number
23	W	21	extreme values	0.7	0.1	0	9	1900	2390	2000	26	random number
24	W	21	extreme values	0.6	0.2	0	9	1800	2260	1800	26	random number
25	W	25	extreme values	0.5	0.3	0.01	9	10000	12600	10000	26	random number
26	W	30	extreme values	0.6	0	0	9	1800	2260	2000	26	random number
27	W	29	extreme values	0.7	0.1	0	9	900	1130	900	26	random number
28	W	24	extreme values	0.65	0.3	0	9	4300	5410	NA	26	random number
29	M	29	extreme values	0.3	0.1	0	9	450	560	500	26	random number
30	M	24	extreme values	0.65	0.2	0	9	2600	3270	2600	26	random number
31	M	23	extreme values	0.75	-0.2	0	9	3000	3780	2900	26	random number
32	W	22	extreme values	0.5	0	0	9	1200	1510	1200	26	random number
33	M	24	extreme values	0.05	0	0	9	1050	1320	1050	26	random number
34	W	27	extreme values	0.6	0	0	9	2500	3150	2500	26	random number
35	W	30	extreme values	0.5	0	0.25	9	345	430	348	26	random number
36	W	20	extreme values	0.85	0.1	0.5	9	2800	3520	2800	26	random number
37	W	24	extreme values	0.2	0	0.3	9	3980	5010	3980	26	random number
38	W	21	extreme values	0.7	0.05	0	9	1500	1890	1600	26	random number
39	M	21	extreme values	0.55	0.05	0	9	1250	1570	1250	26	random number
40	W	22	extreme values	0.8	0.4	0.1	9	1800	2260	1800	26	random number
41	M	21	extreme values	0.7	0.15	0.1	9	4300	5410	4500	26	random number
42	M	21	extreme values	0.25	0.1	0	9	3250	4090	3200	26	random number
43	M	22	extreme values	0.6	-0.1	0	9	2000	2520	2000	26	random number
44	W	NA	extreme values	0.2	0	0	9	650	810	650	26	random number
45	M	23	extreme values	0.7	0	0	9	4800	6040	4800	26	random number
46	W	23	extreme values	0.93	0.27	0.5	9	5000	6300	5500	26	random number
47	M	21	extreme values	0.4	0.05	0.05	9	2800	3520	2800	26	random number
48	W	21	extreme values	0.8	0.2	0.1	9	3750	4720	3750	26	random number
49	W	23	no extreme values	0.7	0.1	0.2	9	2100	2640	2200	26	random number
50	M	21	no extreme values	0.5	0.05	0	9	5400	6800	5400	26	random number
51	W	25	no extreme values	0.3	0.45	0.1	9	2800	3520	2900	26	random number
52	M	25	no extreme values	0.45	-1	0.5	9	1100	1380	1210	26	random number
53	W	24	no extreme values	0.7	0	0	9	700	880	750	26	random number
54	W	25	no extreme values	0.7	0.35	0	9	1800	2260	1900	26	random number
55	W	25	no extreme values	0.8	-0.2	0	9	430	540	430	26	random number
56	W	27	no extreme values	0.9	0.4	0.6	9	3610	4540	3990	26	random number
57	W	25	no extreme values	0.8	0.1	0	9	5300	6670	5300	26	random number
58	W	25	no extreme values	0.3	0.05	0.05	9	3240	4080	3240	26	random number
59	M	24	no extreme values	0.75	0.05	0	9	760	950	850	26	random number
60	M	31	no extreme values	0.85	0.45	0.5	9	NA	120	1100	26	random number
61	W	NA	no extreme values	0.5	0.05	0	9	1660	2090	1660	26	random number
62	W	24	no extreme values	0.5	0.5	0	9	7500	9450	7000	26	random number
63	W	NA	no extreme values	0.6	0.35	0	9	1900	2390	1900	26	random number
64	W	26	no extreme values	0.5	0.5	0.5	9	600	750	650	26	random number
65	W	24	no extreme values	0.5	0.3	0.1	9	3000	3780	3300	26	random number
66	W	20	no extreme values	0.5	0.7	0	9	2000	2520	2100	26	random number
67	W	21	no extreme values	0.8	0.5	0	9	900	1130	900	26	random number
68	W	25	no extreme values	0.75	-0.1	0	9	900	1130	900	26	random number
69	W	21	no extreme values	0.7	0.4	0.5	9	3500	4410	3500	26	random number
70	W	22	no extreme values	0.8	0	0	9	580	730	600	26	random number
71	M	23	no extreme values	0.8	0.2	0	9	2875	3620	2900	26	random number
72	W	28	no extreme values	0.75	0.07	0.35	9	3097	3900	3699	26	random number
73	W	27	no extreme values	0.9	0.2	0	9	3000	3780	3000	26	random number
74	W	21	no extreme values	0.8	0.2	0.3	9	900	1130	900	26	random number
75	M	26	no extreme values	0.6	0.1	0	9	2450	3080	2500	26	random number
76	W	24	no extreme values	0.5	0.05	0.05	9	2346	2950	234	26	random number
77	M	27	no extreme values	0.3	0	0	9	3500	4410	3500	26	random number
78	M	35	no extreme values	0.5	0.3	0.05	9	2950	3710	2950	26	random number
79	W	26	no extreme values	0.6	0.2	-0.5	9	3500	4410	4000	26	random number
80	W	22	no extreme values	0.8	0	0.2	9	1456	1830	1456	26	random number
81	W	26	no extreme values	0.35	0.5	0.5	9	800	1000	900	26	random number
82	W	24	no extreme values	0.5	0	0	9	3000	3780	3000	26	random number
83	M	22	no extreme values	0.6	0.2	0	9	3000	3780	3000	26	random number
84	W	22	no extreme values	0.8	0.1	0	9	1300	1630	1300	26	random number
85	W	23	no extreme values	0.5	-0.1	0	9	2300	2890	2300	26	random number
86	W	22	no extreme values	0.69	0.3	0.3	9	3000	3780	3000	26	random number
87	W	22	no extreme values	0.4	0.2	0	9	2000	2520	2400	26	random number
88	W	23	no extreme values	0.5	0.1	0	9	2000	2520	2000	26	random number
89	W	22	no extreme values	0.6	-0.1	0	9	1300	1630	1300	26	random number
90	W	22	no extreme values	0.25	-0.25	0.05	9	6100	7680	7225	26	random number
91	W	24	no extreme values	0.7	0	0	9	1700	2140	1700	26	random number
92	W	20	no extreme values	0.5	0.1	0	9	2000	2520	2250	26	random number
93	W	26	no extreme values	0.25	-0.1	0	9	3250	4090	3250	26	random number
94	W	21	no extreme values	0.25	0.25	0	9	2304	2900	2340	26	random number
95	W	25	no extreme values	0.7	0.5	0.1	9	1000	1260	1000	26	random number
96	W	25	no extreme values	0.6	0.2	0.1	9	1700	2140	1800	26	random number
97	W	25	no extreme values	0.75	0.5	0	9	920	1150	920	26	random number
98	W	26	no extreme values	0.7	0.1	0.2	9	1400	1760	1500	26	random number
99	M	23	no extreme values	0.4	0.02	0	9	2000	2520	2000	26	random number
1	M	21	extreme values	0.7	-0.1	0	10	1000	770	1000	-23	somewhat competent
2	W	22	extreme values	0.8	0.3	0	10	1000	770	800	-23	somewhat competent
3	W	20	extreme values	0.5	0.2	0.2	10	400	300	400	-23	somewhat competent
4	W	26	extreme values	NA	NA	0	10	1100	840	1100	-23	somewhat competent
5	M	27	extreme values	0.15	0.05	0	10	1600	1230	1600	-23	somewhat competent
6	W	25	extreme values	0.5	0.1	0	10	3000	2310	2500	-23	somewhat competent
7	W	33	extreme values	0.5	0.1	0.1	10	3000	2310	2900	-23	somewhat competent
8	W	26	extreme values	0.9	0.2	0	10	2300	1770	2300	-23	somewhat competent
9	W	21	extreme values	0.65	0.1	0.35	10	1600	1230	1500	-23	somewhat competent
10	W	24	extreme values	0.6	0.2	0	10	1950	1500	1950	-23	somewhat competent
11	W	27	extreme values	0.75	0.1	0.35	10	4500	3460	4200	-23	somewhat competent
12	W	26	extreme values	0.7	0.1	0	10	1300	1000	1300	-23	somewhat competent
13	W	23	extreme values	0.65	0.2	0	10	500	380	480	-23	somewhat competent
14	W	27	extreme values	0.6	0.05	0	10	1190	910	1190	-23	somewhat competent
15	W	27	extreme values	0.8	0.2	0.1	10	1150	880	1100	-23	somewhat competent
16	M	21	extreme values	0.65	0.5	0	10	1950	1500	1950	-23	somewhat competent
17	W	21	extreme values	0.9	-0.1	0	10	2800	2150	2800	-23	somewhat competent
18	M	25	extreme values	0.75	0.2	0	10	900	690	860	-23	somewhat competent
19	W	24	extreme values	0.5	0.25	0.25	10	9230	7100	9000	-23	somewhat competent
20	W	26	extreme values	0.75	0	0	10	1200	920	1200	-23	somewhat competent
21	W	20	extreme values	0.7	0.1	0	10	1200	920	1080	-23	somewhat competent
22	W	24	extreme values	0.75	0.3	0	10	2210	1700	2000	-23	somewhat competent
23	W	21	extreme values	0.7	0.1	0	10	1200	920	1110	-23	somewhat competent
24	W	21	extreme values	0.6	0.2	0	10	2000	1540	1900	-23	somewhat competent
25	W	25	extreme values	0.5	0.3	0.01	10	3500	2690	3500	-23	somewhat competent
26	W	30	extreme values	0.6	0	0	10	2500	1920	2350	-23	somewhat competent
27	W	29	extreme values	0.7	0.1	0	10	450	340	430	-23	somewhat competent
28	W	24	extreme values	0.65	0.3	0	10	1400	1070	1400	-23	somewhat competent
29	M	29	extreme values	0.3	0.1	0	10	600	460	550	-23	somewhat competent
30	M	24	extreme values	0.65	0.2	0	10	900	690	900	-23	somewhat competent
31	M	23	extreme values	0.75	-0.2	0	10	2100	1610	2000	-23	somewhat competent
32	W	22	extreme values	0.5	0	0	10	1400	1070	1400	-23	somewhat competent
33	M	24	extreme values	0.05	0	0	10	760	580	760	-23	somewhat competent
34	W	27	extreme values	0.6	0	0	10	2800	2150	2800	-23	somewhat competent
35	W	30	extreme values	0.5	0	0.25	10	400	300	375	-23	somewhat competent
36	W	20	extreme values	0.85	0.1	0.5	10	2400	1840	2400	-23	somewhat competent
37	W	24	extreme values	0.2	0	0.3	10	2000	1540	2000	-23	somewhat competent
38	W	21	extreme values	0.7	0.05	0	10	1600	1230	1600	-23	somewhat competent
39	M	21	extreme values	0.55	0.05	0	10	1000	770	950	-23	somewhat competent
40	W	22	extreme values	0.8	0.4	0.1	10	1500	1150	1500	-23	somewhat competent
41	M	21	extreme values	0.7	0.15	0.1	10	2668	2050	2668	-23	somewhat competent
42	M	21	extreme values	0.25	0.1	0	10	2300	1770	2200	-23	somewhat competent
43	M	22	extreme values	0.6	-0.1	0	10	1500	1150	1500	-23	somewhat competent
44	W	NA	extreme values	0.2	0	0	10	700	530	700	-23	somewhat competent
45	M	23	extreme values	0.7	0	0	10	1600	1230	1600	-23	somewhat competent
46	W	23	extreme values	0.93	0.27	0.5	10	6000	4620	5000	-23	somewhat competent
47	M	21	extreme values	0.4	0.05	0.05	10	1250	960	1250	-23	somewhat competent
48	W	21	extreme values	0.8	0.2	0.1	10	7460	5740	7460	-23	somewhat competent
49	W	23	no extreme values	0.7	0.1	0.2	10	500	380	500	-23	somewhat competent
50	M	21	no extreme values	0.5	0.05	0	10	3600	2770	3600	-23	somewhat competent
51	W	25	no extreme values	0.3	0.45	0.1	10	2300	1770	2200	-23	somewhat competent
52	M	25	no extreme values	0.45	-1	0.5	10	950	730	830	-23	somewhat competent
53	W	24	no extreme values	0.7	0	0	10	700	530	700	-23	somewhat competent
54	W	25	no extreme values	0.7	0.35	0	10	1400	1070	1600	-23	somewhat competent
55	W	25	no extreme values	0.8	-0.2	0	10	610	460	610	-23	somewhat competent
56	W	27	no extreme values	0.9	0.4	0.6	10	1540	1180	1540	-23	somewhat competent
57	W	25	no extreme values	0.8	0.1	0	10	5900	4540	5900	-23	somewhat competent
58	W	25	no extreme values	0.3	0.05	0.05	10	29080	3000	2908	-23	somewhat competent
59	M	24	no extreme values	0.75	0.05	0	10	250	190	NA	-23	somewhat competent
60	M	31	no extreme values	0.85	0.45	0.5	10	600	460	550	-23	somewhat competent
61	W	NA	no extreme values	0.5	0.05	0	10	2300	1770	2200	-23	somewhat competent
62	W	24	no extreme values	0.5	0.5	0	10	5000	3850	6000	-23	somewhat competent
63	W	NA	no extreme values	0.6	0.35	0	10	1500	1150	1400	-23	somewhat competent
64	W	26	no extreme values	0.5	0.5	0.5	10	250	190	250	-23	somewhat competent
65	W	24	no extreme values	0.5	0.3	0.1	10	1505	1150	1500	-23	somewhat competent
66	W	20	no extreme values	0.5	0.7	0	10	3000	2310	2800	-23	somewhat competent
67	W	21	no extreme values	0.8	0.5	0	10	700	530	700	-23	somewhat competent
68	W	25	no extreme values	0.75	-0.1	0	10	1340	1030	1340	-23	somewhat competent
69	W	21	no extreme values	0.7	0.4	0.5	10	2300	1770	2000	-23	somewhat competent
70	W	22	no extreme values	0.8	0	0	10	780	600	1200	-23	somewhat competent
71	M	23	no extreme values	0.8	0.2	0	10	1850	1420	1900	-23	somewhat competent
72	W	28	no extreme values	0.75	0.07	0.35	10	2974	2280	NA	-23	somewhat competent
73	W	27	no extreme values	0.9	0.2	0	10	2000	1540	1900	-23	somewhat competent
74	W	21	no extreme values	0.8	0.2	0.3	10	1000	770	1000	-23	somewhat competent
75	M	26	no extreme values	0.6	0.1	0	10	1300	1000	1300	-23	somewhat competent
76	W	24	no extreme values	0.5	0.05	0.05	10	1789	1370	1789	-23	somewhat competent
77	M	27	no extreme values	0.3	0	0	10	2300	1770	2300	-23	somewhat competent
78	M	35	no extreme values	0.5	0.3	0.05	10	2100	1610	2000	-23	somewhat competent
79	W	26	no extreme values	0.6	0.2	-0.5	10	2500	1920	2600	-23	somewhat competent
80	W	22	no extreme values	0.8	0	0.2	10	1569	1200	1256	-23	somewhat competent
81	W	26	no extreme values	0.35	0.5	0.5	10	800	610	1000	-23	somewhat competent
82	W	24	no extreme values	0.5	0	0	10	2800	2150	2800	-23	somewhat competent
83	M	22	no extreme values	0.6	0.2	0	10	1000	770	900	-23	somewhat competent
84	W	22	no extreme values	0.8	0.1	0	10	2000	1540	2000	-23	somewhat competent
85	W	23	no extreme values	0.5	-0.1	0	10	2200	1690	2200	-23	somewhat competent
86	W	22	no extreme values	0.69	0.3	0.3	10	3000	2310	2500	-23	somewhat competent
87	W	22	no extreme values	0.4	0.2	0	10	2100	1610	2000	-23	somewhat competent
88	W	23	no extreme values	0.5	0.1	0	10	1000	770	1000	-23	somewhat competent
89	W	22	no extreme values	0.6	-0.1	0	10	1000	770	1000	-23	somewhat competent
90	W	22	no extreme values	0.25	-0.25	0.05	10	3450	2650	3500	-23	somewhat competent
91	W	24	no extreme values	0.7	0	0	10	1300	1000	NA	-23	somewhat competent
92	W	20	no extreme values	0.5	0.1	0	10	3800	2920	3550	-23	somewhat competent
93	W	26	no extreme values	0.25	-0.1	0	10	2900	2230	2900	-23	somewhat competent
94	W	21	no extreme values	0.25	0.25	0	10	2904	2230	2544	-23	somewhat competent
95	W	25	no extreme values	0.7	0.5	0.1	10	1000	770	1000	-23	somewhat competent
96	W	25	no extreme values	0.6	0.2	0.1	10	3000	2310	3000	-23	somewhat competent
97	W	25	no extreme values	0.75	0.5	0	10	830	630	800	-23	somewhat competent
98	W	26	no extreme values	0.7	0.1	0.2	10	2000	1540	2000	-23	somewhat competent
99	M	23	no extreme values	0.4	0.02	0	10	1400	1070	1400	-23	somewhat competent
1	M	21	extreme values	0.7	-0.1	0	11	350	280	350	-18	random number
2	W	22	extreme values	0.8	0.3	0	11	800	650	800	-18	random number
3	W	20	extreme values	0.5	0.2	0.2	11	250	200	250	-18	random number
4	W	26	extreme values	NA	NA	0	11	400	320	400	-18	random number
5	M	27	extreme values	0.15	0.05	0	11	500	410	500	-18	random number
6	W	25	extreme values	0.5	0.1	0	11	650	530	500	-18	random number
7	W	33	extreme values	0.5	0.1	0.1	11	700	570	700	-18	random number
8	W	26	extreme values	0.9	0.2	0	11	400	320	400	-18	random number
9	W	21	extreme values	0.65	0.1	0.35	11	400	320	400	-18	random number
10	W	24	extreme values	0.6	0.2	0	11	650	530	650	-18	random number
11	W	27	extreme values	0.75	0.1	0.35	11	2600	2130	2600	-18	random number
12	W	26	extreme values	0.7	0.1	0	11	300	240	300	-18	random number
13	W	23	extreme values	0.65	0.2	0	11	3440	2820	3440	-18	random number
14	W	27	extreme values	0.6	0.05	0	11	310	250	310	-18	random number
15	W	27	extreme values	0.8	0.2	0.1	11	600	490	580	-18	random number
16	M	21	extreme values	0.65	0.5	0	11	286	230	286	-18	random number
17	W	21	extreme values	0.9	-0.1	0	11	1009	820	1009	-18	random number
18	M	25	extreme values	0.75	0.2	0	11	600	490	600	-18	random number
19	W	24	extreme values	0.5	0.25	0.25	11	1120	910	1120	-18	random number
20	W	26	extreme values	0.75	0	0	11	500	410	500	-18	random number
21	W	20	extreme values	0.7	0.1	0	11	1100	900	1100	-18	random number
22	W	24	extreme values	0.75	0.3	0	11	450	360	450	-18	random number
23	W	21	extreme values	0.7	0.1	0	11	500	410	500	-18	random number
24	W	21	extreme values	0.6	0.2	0	11	250	200	250	-18	random number
25	W	25	extreme values	0.5	0.3	0.01	11	4000	3280	4000	-18	random number
26	W	30	extreme values	0.6	0	0	11	1000	820	1000	-18	random number
27	W	29	extreme values	0.7	0.1	0	11	300	240	300	-18	random number
28	W	24	extreme values	0.65	0.3	0	11	700	570	700	-18	random number
29	M	29	extreme values	0.3	0.1	0	11	230	180	200	-18	random number
30	M	24	extreme values	0.65	0.2	0	11	500	410	500	-18	random number
31	M	23	extreme values	0.75	-0.2	0	11	450	360	450	-18	random number
32	W	22	extreme values	0.5	0	0	11	900	730	880	-18	random number
33	M	24	extreme values	0.05	0	0	11	260	210	260	-18	random number
34	W	27	extreme values	0.6	0	0	11	600	490	450	-18	random number
35	W	30	extreme values	0.5	0	0.25	11	200	160	NA	-18	random number
36	W	20	extreme values	0.85	0.1	0.5	11	320	260	320	-18	random number
37	W	24	extreme values	0.2	0	0.3	11	450	360	450	-18	random number
38	W	21	extreme values	0.7	0.05	0	11	400	320	400	-18	random number
39	M	21	extreme values	0.55	0.05	0	11	300	240	300	-18	random number
40	W	22	extreme values	0.8	0.4	0.1	11	500	410	500	-18	random number
41	M	21	extreme values	0.7	0.15	0.1	11	2000	1640	200	-18	random number
42	M	21	extreme values	0.25	0.1	0	11	800	650	820	-18	random number
43	M	22	extreme values	0.6	-0.1	0	11	400	320	400	-18	random number
44	W	NA	extreme values	0.2	0	0	11	200	160	200	-18	random number
45	M	23	extreme values	0.7	0	0	11	470	380	470	-18	random number
46	W	23	extreme values	0.93	0.27	0.5	11	6000	4920	6000	-18	random number
47	M	21	extreme values	0.4	0.05	0.05	11	680	550	680	-18	random number
48	W	21	extreme values	0.8	0.2	0.1	11	3890	3180	3890	-18	random number
49	W	23	no extreme values	0.7	0.1	0.2	11	850	690	850	-18	random number
50	M	21	no extreme values	0.5	0.05	0	11	250	200	250	-18	random number
51	W	25	no extreme values	0.3	0.45	0.1	11	999	810	998	-18	random number
52	M	25	no extreme values	0.45	-1	0.5	11	300	240	280	-18	random number
53	W	24	no extreme values	0.7	0	0	11	330	270	300	-18	random number
54	W	25	no extreme values	0.7	0.35	0	11	400	320	400	-18	random number
55	W	25	no extreme values	0.8	-0.2	0	11	310	250	310	-18	random number
56	W	27	no extreme values	0.9	0.4	0.6	11	600	490	560	-18	random number
57	W	25	no extreme values	0.8	0.1	0	11	1500	1230	1200	-18	random number
58	W	25	no extreme values	0.3	0.05	0.05	11	856	700	856	-18	random number
59	M	24	no extreme values	0.75	0.05	0	11	350	280	NA	-18	random number
60	M	31	no extreme values	0.85	0.45	0.5	11	250	200	200	-18	random number
61	W	NA	no extreme values	0.5	0.05	0	11	410	330	410	-18	random number
62	W	24	no extreme values	0.5	0.5	0	11	3000	2460	3500	-18	random number
63	W	NA	no extreme values	0.6	0.35	0	11	300	240	300	-18	random number
64	W	26	no extreme values	0.5	0.5	0.5	11	NA	40	NA	-18	random number
65	W	24	no extreme values	0.5	0.3	0.1	11	600	490	600	-18	random number
66	W	20	no extreme values	0.5	0.7	0	11	2500	2050	2500	-18	random number
67	W	21	no extreme values	0.8	0.5	0	11	NA	150	NA	-18	random number
68	W	25	no extreme values	0.75	-0.1	0	11	450	360	450	-18	random number
69	W	21	no extreme values	0.7	0.4	0.5	11	200	160	200	-18	random number
70	W	22	no extreme values	0.8	0	0	11	480	390	480	-18	random number
71	M	23	no extreme values	0.8	0.2	0	11	345	280	325	-18	random number
72	W	28	no extreme values	0.75	0.07	0.35	11	670	540	664	-18	random number
73	W	27	no extreme values	0.9	0.2	0	11	500	410	500	-18	random number
74	W	21	no extreme values	0.8	0.2	0.3	11	1100	900	1100	-18	random number
75	M	26	no extreme values	0.6	0.1	0	11	450	360	NA	-18	random number
76	W	24	no extreme values	0.5	0.05	0.05	11	560	450	560	-18	random number
77	M	27	no extreme values	0.3	0	0	11	600	490	600	-18	random number
78	M	35	no extreme values	0.5	0.3	0.05	11	450	360	440	-18	random number
79	W	26	no extreme values	0.6	0.2	-0.5	11	500	410	450	-18	random number
80	W	22	no extreme values	0.8	0	0.2	11	1456	1190	1456	-18	random number
81	W	26	no extreme values	0.35	0.5	0.5	11	NA	80	268	-18	random number
82	W	24	no extreme values	0.5	0	0	11	1200	980	1200	-18	random number
83	M	22	no extreme values	0.6	0.2	0	11	550	450	450	-18	random number
84	W	22	no extreme values	0.8	0.1	0	11	300	240	300	-18	random number
85	W	23	no extreme values	0.5	-0.1	0	11	600	490	600	-18	random number
86	W	22	no extreme values	0.69	0.3	0.3	11	600	490	650	-18	random number
87	W	22	no extreme values	0.4	0.2	0	11	500	410	500	-18	random number
88	W	23	no extreme values	0.5	0.1	0	11	500	410	500	-18	random number
89	W	22	no extreme values	0.6	-0.1	0	11	450	360	450	-18	random number
90	W	22	no extreme values	0.25	-0.25	0.05	11	1600	1310	1550	-18	random number
91	W	24	no extreme values	0.7	0	0	11	500	410	500	-18	random number
92	W	20	no extreme values	0.5	0.1	0	11	1200	980	NA	-18	random number
93	W	26	no extreme values	0.25	-0.1	0	11	200	160	200	-18	random number
94	W	21	no extreme values	0.25	0.25	0	11	877	710	877	-18	random number
95	W	25	no extreme values	0.7	0.5	0.1	11	700	570	700	-18	random number
96	W	25	no extreme values	0.6	0.2	0.1	11	1000	820	1000	-18	random number
97	W	25	no extreme values	0.75	0.5	0	11	360	290	360	-18	random number
98	W	26	no extreme values	0.7	0.1	0.2	11	600	490	600	-18	random number
99	M	23	no extreme values	0.4	0.02	0	11	310	250	310	-18	random number
1	M	21	extreme values	0.7	-0.1	0	12	600	740	600	24	somewhat competent
2	W	22	extreme values	0.8	0.3	0	12	1500	1860	1650	24	somewhat competent
3	W	20	extreme values	0.5	0.2	0.2	12	410	500	450	24	somewhat competent
4	W	26	extreme values	NA	NA	0	12	800	990	800	24	somewhat competent
5	M	27	extreme values	0.15	0.05	0	12	900	1110	900	24	somewhat competent
6	W	25	extreme values	0.5	0.1	0	12	400	490	390	24	somewhat competent
7	W	33	extreme values	0.5	0.1	0.1	12	1800	2230	1800	24	somewhat competent
8	W	26	extreme values	0.9	0.2	0	12	470	580	490	24	somewhat competent
9	W	21	extreme values	0.65	0.1	0.35	12	900	1110	900	24	somewhat competent
10	W	24	extreme values	0.6	0.2	0	12	850	1050	NA	24	somewhat competent
11	W	27	extreme values	0.75	0.1	0.35	12	3800	4710	4000	24	somewhat competent
12	W	26	extreme values	0.7	0.1	0	12	1100	1360	1000	24	somewhat competent
13	W	23	extreme values	0.65	0.2	0	12	550	680	570	24	somewhat competent
14	W	27	extreme values	0.6	0.05	0	12	450	550	450	24	somewhat competent
15	W	27	extreme values	0.8	0.2	0.1	12	900	1110	920	24	somewhat competent
16	M	21	extreme values	0.65	0.5	0	12	1050	1300	1050	24	somewhat competent
17	W	21	extreme values	0.9	-0.1	0	12	1800	2230	1800	24	somewhat competent
18	M	25	extreme values	0.75	0.2	0	12	1460	1810	1560	24	somewhat competent
19	W	24	extreme values	0.5	0.25	0.25	12	7560	3000	7560	24	somewhat competent
20	W	26	extreme values	0.75	0	0	12	900	1110	900	24	somewhat competent
21	W	20	extreme values	0.7	0.1	0	12	360	440	410	24	somewhat competent
22	W	24	extreme values	0.75	0.3	0	12	1800	2230	1800	24	somewhat competent
23	W	21	extreme values	0.7	0.1	0	12	1000	1240	1150	24	somewhat competent
24	W	21	extreme values	0.6	0.2	0	12	600	740	600	24	somewhat competent
25	W	25	extreme values	0.5	0.3	0.01	12	2300	2850	2300	24	somewhat competent
26	W	30	extreme values	0.6	0	0	12	950	1170	1000	24	somewhat competent
27	W	29	extreme values	0.7	0.1	0	12	350	430	400	24	somewhat competent
28	W	24	extreme values	0.65	0.3	0	12	4200	5200	4600	24	somewhat competent
29	M	29	extreme values	0.3	0.1	0	12	290	350	330	24	somewhat competent
30	M	24	extreme values	0.65	0.2	0	12	780	960	780	24	somewhat competent
31	M	23	extreme values	0.75	-0.2	0	12	1500	1860	1500	24	somewhat competent
32	W	22	extreme values	0.5	0	0	12	1200	1480	1200	24	somewhat competent
33	M	24	extreme values	0.05	0	0	12	490	600	490	24	somewhat competent
34	W	27	extreme values	0.6	0	0	12	750	930	850	24	somewhat competent
35	W	30	extreme values	0.5	0	0.25	12	NA	220	200	24	somewhat competent
36	W	20	extreme values	0.85	0.1	0.5	12	1900	2350	1950	24	somewhat competent
37	W	24	extreme values	0.2	0	0.3	12	780	960	780	24	somewhat competent
38	W	21	extreme values	0.7	0.05	0	12	480	590	480	24	somewhat competent
39	M	21	extreme values	0.55	0.05	0	12	500	620	500	24	somewhat competent
40	W	22	extreme values	0.8	0.4	0.1	12	850	1050	900	24	somewhat competent
41	M	21	extreme values	0.7	0.15	0.1	12	2220	2750	2200	24	somewhat competent
42	M	21	extreme values	0.25	0.1	0	12	1400	1730	1500	24	somewhat competent
43	M	22	extreme values	0.6	-0.1	0	12	500	620	550	24	somewhat competent
44	W	NA	extreme values	0.2	0	0	12	350	430	350	24	somewhat competent
45	M	23	extreme values	0.7	0	0	12	650	800	550	24	somewhat competent
46	W	23	extreme values	0.93	0.27	0.5	12	3500	4340	35000	24	somewhat competent
47	M	21	extreme values	0.4	0.05	0.05	12	1400	1730	1400	24	somewhat competent
48	W	21	extreme values	0.8	0.2	0.1	12	4600	5700	4600	24	somewhat competent
49	W	23	no extreme values	0.7	0.1	0.2	12	870	1070	900	24	somewhat competent
50	M	21	no extreme values	0.5	0.05	0	12	2550	3160	2550	24	somewhat competent
51	W	25	no extreme values	0.3	0.45	0.1	12	2500	3100	2750	24	somewhat competent
52	M	25	no extreme values	0.45	-1	0.5	12	500	620	510	24	somewhat competent
53	W	24	no extreme values	0.7	0	0	12	330	400	360	24	somewhat competent
54	W	25	no extreme values	0.7	0.35	0	12	960	1190	960	24	somewhat competent
55	W	25	no extreme values	0.8	-0.2	0	12	410	500	410	24	somewhat competent
56	W	27	no extreme values	0.9	0.4	0.6	12	1800	2230	1800	24	somewhat competent
57	W	25	no extreme values	0.8	0.1	0	12	3700	4580	3900	24	somewhat competent
58	W	25	no extreme values	0.3	0.05	0.05	12	2040	2520	2040	24	somewhat competent
59	M	24	no extreme values	0.75	0.05	0	12	200	240	NA	24	somewhat competent
60	M	31	no extreme values	0.85	0.45	0.5	12	550	680	570	24	somewhat competent
61	W	NA	no extreme values	0.5	0.05	0	12	600	740	650	24	somewhat competent
62	W	24	no extreme values	0.5	0.5	0	12	5000	6200	5500	24	somewhat competent
63	W	NA	no extreme values	0.6	0.35	0	12	750	930	790	24	somewhat competent
64	W	26	no extreme values	0.5	0.5	0.5	12	250	310	250	24	somewhat competent
65	W	24	no extreme values	0.5	0.3	0.1	12	1000	1240	1111	24	somewhat competent
66	W	20	no extreme values	0.5	0.7	0	12	2300	2850	2000	24	somewhat competent
67	W	21	no extreme values	0.8	0.5	0	12	350	430	300	24	somewhat competent
68	W	25	no extreme values	0.75	-0.1	0	12	545	670	545	24	somewhat competent
69	W	21	no extreme values	0.7	0.4	0.5	12	1800	2230	1800	24	somewhat competent
70	W	22	no extreme values	0.8	0	0	12	620	760	590	24	somewhat competent
71	M	23	no extreme values	0.8	0.2	0	12	560	690	560	24	somewhat competent
72	W	28	no extreme values	0.75	0.07	0.35	12	579	710	579	24	somewhat competent
73	W	27	no extreme values	0.9	0.2	0	12	800	990	850	24	somewhat competent
74	W	21	no extreme values	0.8	0.2	0.3	12	1400	1730	1500	24	somewhat competent
75	M	26	no extreme values	0.6	0.1	0	12	700	860	700	24	somewhat competent
76	W	24	no extreme values	0.5	0.05	0.05	12	420	520	460	24	somewhat competent
77	M	27	no extreme values	0.3	0	0	12	600	740	600	24	somewhat competent
78	M	35	no extreme values	0.5	0.3	0.05	12	890	1100	890	24	somewhat competent
79	W	26	no extreme values	0.6	0.2	-0.5	12	700	860	700	24	somewhat competent
80	W	22	no extreme values	0.8	0	0.2	12	962	1190	999	24	somewhat competent
81	W	26	no extreme values	0.35	0.5	0.5	12	2000	2480	2000	24	somewhat competent
82	W	24	no extreme values	0.5	0	0	12	2000	2480	2000	24	somewhat competent
83	M	22	no extreme values	0.6	0.2	0	12	600	740	630	24	somewhat competent
84	W	22	no extreme values	0.8	0.1	0	12	600	740	550	24	somewhat competent
85	W	23	no extreme values	0.5	-0.1	0	12	980	1210	980	24	somewhat competent
86	W	22	no extreme values	0.69	0.3	0.3	12	1100	1360	NA	24	somewhat competent
87	W	22	no extreme values	0.4	0.2	0	12	2000	2480	2100	24	somewhat competent
88	W	23	no extreme values	0.5	0.1	0	12	400	490	400	24	somewhat competent
89	W	22	no extreme values	0.6	-0.1	0	12	600	740	620	24	somewhat competent
90	W	22	no extreme values	0.25	-0.25	0.05	12	2200	2720	2350	24	somewhat competent
91	W	24	no extreme values	0.7	0	0	12	900	1110	900	24	somewhat competent
92	W	20	no extreme values	0.5	0.1	0	12	1400	1730	NA	24	somewhat competent
93	W	26	no extreme values	0.25	-0.1	0	12	1700	2100	2200	24	somewhat competent
94	W	21	no extreme values	0.25	0.25	0	12	645	790	645	24	somewhat competent
95	W	25	no extreme values	0.7	0.5	0.1	12	500	620	500	24	somewhat competent
96	W	25	no extreme values	0.6	0.2	0.1	12	850	1050	850	24	somewhat competent
97	W	25	no extreme values	0.75	0.5	0	12	700	860	750	24	somewhat competent
98	W	26	no extreme values	0.7	0.1	0.2	12	600	740	600	24	somewhat competent
99	M	23	no extreme values	0.4	0.02	0	12	310	380	310	24	somewhat competent
1	M	21	extreme values	0.7	-0.1	0	13	300	190	250	-36	competent
2	W	22	extreme values	0.8	0.3	0	13	589	370	400	-36	competent
3	W	20	extreme values	0.5	0.2	0.2	13	NA	2000	200	-36	competent
4	W	26	extreme values	NA	NA	0	13	350	220	300	-36	competent
5	M	27	extreme values	0.15	0.05	0	13	600	380	500	-36	competent
6	W	25	extreme values	0.5	0.1	0	13	290	180	NA	-36	competent
7	W	33	extreme values	0.5	0.1	0.1	13	500	320	NA	-36	competent
8	W	26	extreme values	0.9	0.2	0	13	220	140	NA	-36	competent
9	W	21	extreme values	0.65	0.1	0.35	13	400	250	300	-36	competent
10	W	24	extreme values	0.6	0.2	0	13	450	280	350	-36	competent
11	W	27	extreme values	0.75	0.1	0.35	13	1800	1150	1200	-36	competent
12	W	26	extreme values	0.7	0.1	0	13	800	510	600	-36	competent
13	W	23	extreme values	0.65	0.2	0	13	320	200	255	-36	competent
14	W	27	extreme values	0.6	0.05	0	13	NA	100	NA	-36	competent
15	W	27	extreme values	0.8	0.2	0.1	13	200	120	NA	-36	competent
16	M	21	extreme values	0.65	0.5	0	13	455	290	390	-36	competent
17	W	21	extreme values	0.9	-0.1	0	13	800	510	690	-36	competent
18	M	25	extreme values	0.75	0.2	0	13	760	480	610	-36	competent
19	W	24	extreme values	0.5	0.25	0.25	13	1100	700	900	-36	competent
20	W	26	extreme values	0.75	0	0	13	550	350	450	-36	competent
21	W	20	extreme values	0.7	0.1	0	13	200	120	NA	-36	competent
22	W	24	extreme values	0.75	0.3	0	13	450	280	450	-36	competent
23	W	21	extreme values	0.7	0.1	0	13	780	490	680	-36	competent
24	W	21	extreme values	0.6	0.2	0	13	500	320	400	-36	competent
25	W	25	extreme values	0.5	0.3	0.01	13	1700	1080	1700	-36	competent
26	W	30	extreme values	0.6	0	0	13	550	350	450	-36	competent
27	W	29	extreme values	0.7	0.1	0	13	250	160	200	-36	competent
28	W	24	extreme values	0.65	0.3	0	13	1450	920	1100	-36	competent
29	M	29	extreme values	0.3	0.1	0	13	250	160	200	-36	competent
30	M	24	extreme values	0.65	0.2	0	13	300	190	300	-36	competent
31	M	23	extreme values	0.75	-0.2	0	13	600	380	450	-36	competent
32	W	22	extreme values	0.5	0	0	13	800	510	700	-36	competent
33	M	24	extreme values	0.05	0	0	13	350	220	350	-36	competent
34	W	27	extreme values	0.6	0	0	13	600	380	600	-36	competent
35	W	30	extreme values	0.5	0	0.25	13	NA	1700	NA	-36	competent
36	W	20	extreme values	0.85	0.1	0.5	13	390	240	260	-36	competent
37	W	24	extreme values	0.2	0	0.3	13	250	160	220	-36	competent
38	W	21	extreme values	0.7	0.05	0	13	230	140	NA	-36	competent
39	M	21	extreme values	0.55	0.05	0	13	NA	3400	NA	-36	competent
40	W	22	extreme values	0.8	0.4	0.1	13	250	160	NA	-36	competent
41	M	21	extreme values	0.7	0.15	0.1	13	800	510	600	-36	competent
42	M	21	extreme values	0.25	0.1	0	13	900	570	750	-36	competent
43	M	22	extreme values	0.6	-0.1	0	13	300	190	200	-36	competent
44	W	NA	extreme values	0.2	0	0	13	200	120	NA	-36	competent
45	M	23	extreme values	0.7	0	0	13	200	120	NA	-36	competent
46	W	23	extreme values	0.93	0.27	0.5	13	2000	1280	1500	-36	competent
47	M	21	extreme values	0.4	0.05	0.05	13	720	460	600	-36	competent
48	W	21	extreme values	0.8	0.2	0.1	13	2058	1310	1900	-36	competent
49	W	23	no extreme values	0.7	0.1	0.2	13	NA	1200	350	-36	competent
50	M	21	no extreme values	0.5	0.05	0	13	850	540	620	-36	competent
51	W	25	no extreme values	0.3	0.45	0.1	13	890	560	880	-36	competent
52	M	25	no extreme values	0.45	-1	0.5	13	350	220	270	-36	competent
53	W	24	no extreme values	0.7	0	0	13	250	160	200	-36	competent
54	W	25	no extreme values	0.7	0.35	0	13	580	370	470	-36	competent
55	W	25	no extreme values	0.8	-0.2	0	13	280	170	NA	-36	competent
56	W	27	no extreme values	0.9	0.4	0.6	13	600	380	520	-36	competent
57	W	25	no extreme values	0.8	0.1	0	13	900	570	660	-36	competent
58	W	25	no extreme values	0.3	0.05	0.05	13	591	370	591	-36	competent
59	M	24	no extreme values	0.75	0.05	0	13	NA	2900	NA	-36	competent
60	M	31	no extreme values	0.85	0.45	0.5	13	200	120	NA	-36	competent
61	W	NA	no extreme values	0.5	0.05	0	13	230	140	200	-36	competent
62	W	24	no extreme values	0.5	0.5	0	13	1500	960	1000	-36	competent
63	W	NA	no extreme values	0.6	0.35	0	13	350	220	290	-36	competent
64	W	26	no extreme values	0.5	0.5	0.5	13	200	120	NA	-36	competent
65	W	24	no extreme values	0.5	0.3	0.1	13	600	380	510	-36	competent
66	W	20	no extreme values	0.5	0.7	0	13	1000	640	800	-36	competent
67	W	21	no extreme values	0.8	0.5	0	13	NA	110	NA	-36	competent
68	W	25	no extreme values	0.75	-0.1	0	13	390	240	390	-36	competent
69	W	21	no extreme values	0.7	0.4	0.5	13	200	120	NA	-36	competent
70	W	22	no extreme values	0.8	0	0	13	400	250	280	-36	competent
71	M	23	no extreme values	0.8	0.2	0	13	325	200	250	-36	competent
72	W	28	no extreme values	0.75	0.07	0.35	13	534	340	534	-36	competent
73	W	27	no extreme values	0.9	0.2	0	13	400	250	290	-36	competent
74	W	21	no extreme values	0.8	0.2	0.3	13	1100	700	750	-36	competent
75	M	26	no extreme values	0.6	0.1	0	13	350	220	250	-36	competent
76	W	24	no extreme values	0.5	0.05	0.05	13	NA	3200	1209	-36	competent
77	M	27	no extreme values	0.3	0	0	13	300	190	300	-36	competent
78	M	35	no extreme values	0.5	0.3	0.05	13	500	320	450	-36	competent
79	W	26	no extreme values	0.6	0.2	-0.5	13	700	440	500	-36	competent
80	W	22	no extreme values	0.8	0	0.2	13	652	410	444	-36	competent
81	W	26	no extreme values	0.35	0.5	0.5	13	NA	1600	400	-36	competent
82	W	24	no extreme values	0.5	0	0	13	800	510	600	-36	competent
83	M	22	no extreme values	0.6	0.2	0	13	340	210	250	-36	competent
84	W	22	no extreme values	0.8	0.1	0	13	400	250	300	-36	competent
85	W	23	no extreme values	0.5	-0.1	0	13	340	210	300	-36	competent
86	W	22	no extreme values	0.69	0.3	0.3	13	690	440	600	-36	competent
87	W	22	no extreme values	0.4	0.2	0	13	1500	960	1300	-36	competent
88	W	23	no extreme values	0.5	0.1	0	13	NA	2500	200	-36	competent
89	W	22	no extreme values	0.6	-0.1	0	13	300	190	250	-36	competent
90	W	22	no extreme values	0.25	-0.25	0.05	13	650	410	520	-36	competent
91	W	24	no extreme values	0.7	0	0	13	200	120	NA	-36	competent
92	W	20	no extreme values	0.5	0.1	0	13	1200	760	850	-36	competent
93	W	26	no extreme values	0.25	-0.1	0	13	1000	640	950	-36	competent
94	W	21	no extreme values	0.25	0.25	0	13	344	220	270	-36	competent
95	W	25	no extreme values	0.7	0.5	0.1	13	NA	110	NA	-36	competent
96	W	25	no extreme values	0.6	0.2	0.1	13	400	250	350	-36	competent
97	W	25	no extreme values	0.75	0.5	0	13	350	220	300	-36	competent
98	W	26	no extreme values	0.7	0.1	0.2	13	300	190	270	-36	competent
99	M	23	no extreme values	0.4	0.02	0	13	280	170	250	-36	competent
1	M	21	extreme values	0.7	-0.1	0	14	2300	2940	2300	28	somewhat competent
2	W	22	extreme values	0.8	0.3	0	14	3590	4590	4090	28	somewhat competent
3	W	20	extreme values	0.5	0.2	0.2	14	550	700	550	28	somewhat competent
4	W	26	extreme values	NA	NA	0	14	2000	2560	2300	28	somewhat competent
5	M	27	extreme values	0.15	0.05	0	14	3200	4090	3400	28	somewhat competent
6	W	25	extreme values	0.5	0.1	0	14	3600	4600	4000	28	somewhat competent
7	W	33	extreme values	0.5	0.1	0.1	14	4500	5760	5000	28	somewhat competent
8	W	26	extreme values	0.9	0.2	0	14	3250	4160	3550	28	somewhat competent
9	W	21	extreme values	0.65	0.1	0.35	14	3500	4480	3500	28	somewhat competent
10	W	24	extreme values	0.6	0.2	0	14	2800	3580	2900	28	somewhat competent
11	W	27	extreme values	0.75	0.1	0.35	14	6200	1900	6200	28	somewhat competent
12	W	26	extreme values	0.7	0.1	0	14	900	1150	900	28	somewhat competent
13	W	23	extreme values	0.65	0.2	0	14	360	460	380	28	somewhat competent
14	W	27	extreme values	0.6	0.05	0	14	1200	1530	1200	28	somewhat competent
15	W	27	extreme values	0.8	0.2	0.1	14	990	1260	1050	28	somewhat competent
16	M	21	extreme values	0.65	0.5	0	14	4105	5250	4105	28	somewhat competent
17	W	21	extreme values	0.9	-0.1	0	14	5100	6520	5100	28	somewhat competent
18	M	25	extreme values	0.75	0.2	0	14	4260	5450	4260	28	somewhat competent
19	W	24	extreme values	0.5	0.25	0.25	14	10250	1500	10250	28	somewhat competent
20	W	26	extreme values	0.75	0	0	14	4500	5760	4500	28	somewhat competent
21	W	20	extreme values	0.7	0.1	0	14	1400	1790	1620	28	somewhat competent
22	W	24	extreme values	0.75	0.3	0	14	4150	5310	4500	28	somewhat competent
23	W	21	extreme values	0.7	0.1	0	14	2000	2560	2000	28	somewhat competent
24	W	21	extreme values	0.6	0.2	0	14	2800	3580	2900	28	somewhat competent
25	W	25	extreme values	0.5	0.3	0.01	14	6700	3300	6300	28	somewhat competent
26	W	30	extreme values	0.6	0	0	14	3000	3840	3200	28	somewhat competent
27	W	29	extreme values	0.7	0.1	0	14	700	890	730	28	somewhat competent
28	W	24	extreme values	0.65	0.3	0	14	4000	5120	4300	28	somewhat competent
29	M	29	extreme values	0.3	0.1	0	14	400	510	462	28	somewhat competent
30	M	24	extreme values	0.65	0.2	0	14	450	570	450	28	somewhat competent
31	M	23	extreme values	0.75	-0.2	0	14	3200	4090	3300	28	somewhat competent
32	W	22	extreme values	0.5	0	0	14	2300	2940	2300	28	somewhat competent
33	M	24	extreme values	0.05	0	0	14	1090	1390	1090	28	somewhat competent
34	W	27	extreme values	0.6	0	0	14	3000	3840	3500	28	somewhat competent
35	W	30	extreme values	0.5	0	0.25	14	700	890	800	28	somewhat competent
36	W	20	extreme values	0.85	0.1	0.5	14	1600	2040	1670	28	somewhat competent
37	W	24	extreme values	0.2	0	0.3	14	3250	4160	2610	28	somewhat competent
38	W	21	extreme values	0.7	0.05	0	14	1800	2300	1800	28	somewhat competent
39	M	21	extreme values	0.55	0.05	0	14	3000	3840	3000	28	somewhat competent
40	W	22	extreme values	0.8	0.4	0.1	14	2500	3200	2800	28	somewhat competent
41	M	21	extreme values	0.7	0.15	0.1	14	5800	7420	5800	28	somewhat competent
42	M	21	extreme values	0.25	0.1	0	14	4500	5760	5000	28	somewhat competent
43	M	22	extreme values	0.6	-0.1	0	14	3000	3840	3000	28	somewhat competent
44	W	NA	extreme values	0.2	0	0	14	1000	1280	1000	28	somewhat competent
45	M	23	extreme values	0.7	0	0	14	3990	5100	3450	28	somewhat competent
46	W	23	extreme values	0.93	0.27	0.5	14	3000	3840	4000	28	somewhat competent
47	M	21	extreme values	0.4	0.05	0.05	14	4200	5370	4350	28	somewhat competent
48	W	21	extreme values	0.8	0.2	0.1	14	10357	2100	10357	28	somewhat competent
49	W	23	no extreme values	0.7	0.1	0.2	14	1400	1790	1400	28	somewhat competent
50	M	21	no extreme values	0.5	0.05	0	14	6200	500	6200	28	somewhat competent
51	W	25	no extreme values	0.3	0.45	0.1	14	3200	4090	3600	28	somewhat competent
52	M	25	no extreme values	0.45	-1	0.5	14	1100	1400	1150	28	somewhat competent
53	W	24	no extreme values	0.7	0	0	14	700	890	799	28	somewhat competent
54	W	25	no extreme values	0.7	0.35	0	14	1700	2170	1800	28	somewhat competent
55	W	25	no extreme values	0.8	-0.2	0	14	590	750	590	28	somewhat competent
56	W	27	no extreme values	0.9	0.4	0.6	14	550	700	550	28	somewhat competent
57	W	25	no extreme values	0.8	0.1	0	14	6800	3400	6500	28	somewhat competent
58	W	25	no extreme values	0.3	0.05	0.05	14	5320	6800	5320	28	somewhat competent
59	M	24	no extreme values	0.75	0.05	0	14	400	510	430	28	somewhat competent
60	M	31	no extreme values	0.85	0.45	0.5	14	780	990	880	28	somewhat competent
61	W	NA	no extreme values	0.5	0.05	0	14	3700	4730	3700	28	somewhat competent
62	W	24	no extreme values	0.5	0.5	0	14	15000	1400	16000	28	somewhat competent
63	W	NA	no extreme values	0.6	0.35	0	14	3200	4090	3500	28	somewhat competent
64	W	26	no extreme values	0.5	0.5	0.5	14	300	380	300	28	somewhat competent
65	W	24	no extreme values	0.5	0.3	0.1	14	3900	4990	3900	28	somewhat competent
66	W	20	no extreme values	0.5	0.7	0	14	1800	2300	1800	28	somewhat competent
67	W	21	no extreme values	0.8	0.5	0	14	1400	1790	1450	28	somewhat competent
68	W	25	no extreme values	0.75	-0.1	0	14	2000	2560	2000	28	somewhat competent
69	W	21	no extreme values	0.7	0.4	0.5	14	1700	2170	2100	28	somewhat competent
70	W	22	no extreme values	0.8	0	0	14	2800	3580	3250	28	somewhat competent
71	M	23	no extreme values	0.8	0.2	0	14	3100	3960	3250	28	somewhat competent
72	W	28	no extreme values	0.75	0.07	0.35	14	4080	5220	4067	28	somewhat competent
73	W	27	no extreme values	0.9	0.2	0	14	6000	3300	5000	28	somewhat competent
74	W	21	no extreme values	0.8	0.2	0.3	14	890	1130	890	28	somewhat competent
75	M	26	no extreme values	0.6	0.1	0	14	3200	4090	3500	28	somewhat competent
76	W	24	no extreme values	0.5	0.05	0.05	14	3100	3960	3100	28	somewhat competent
77	M	27	no extreme values	0.3	0	0	14	3500	4480	3500	28	somewhat competent
78	M	35	no extreme values	0.5	0.3	0.05	14	3900	4990	4200	28	somewhat competent
79	W	26	no extreme values	0.6	0.2	-0.5	14	7000	2500	5000	28	somewhat competent
80	W	22	no extreme values	0.8	0	0.2	14	1569	2000	1456	28	somewhat competent
81	W	26	no extreme values	0.35	0.5	0.5	14	4000	5120	5600	28	somewhat competent
82	W	24	no extreme values	0.5	0	0	14	3300	4220	3800	28	somewhat competent
83	M	22	no extreme values	0.6	0.2	0	14	2400	3070	2500	28	somewhat competent
84	W	22	no extreme values	0.8	0.1	0	14	2500	3200	2500	28	somewhat competent
85	W	23	no extreme values	0.5	-0.1	0	14	3700	4730	3500	28	somewhat competent
86	W	22	no extreme values	0.69	0.3	0.3	14	4550	5820	4550	28	somewhat competent
87	W	22	no extreme values	0.4	0.2	0	14	3700	4730	3800	28	somewhat competent
88	W	23	no extreme values	0.5	0.1	0	14	2500	3200	2500	28	somewhat competent
89	W	22	no extreme values	0.6	-0.1	0	14	1750	2240	2000	28	somewhat competent
90	W	22	no extreme values	0.25	-0.25	0.05	14	5200	6650	5350	28	somewhat competent
91	W	24	no extreme values	0.7	0	0	14	2000	2560	3500	28	somewhat competent
92	W	20	no extreme values	0.5	0.1	0	14	5000	6400	5650	28	somewhat competent
93	W	26	no extreme values	0.25	-0.1	0	14	4000	5120	4000	28	somewhat competent
94	W	21	no extreme values	0.25	0.25	0	14	6079	1200	3044	28	somewhat competent
95	W	25	no extreme values	0.7	0.5	0.1	14	2000	2560	2250	28	somewhat competent
96	W	25	no extreme values	0.6	0.2	0.1	14	4000	5120	4000	28	somewhat competent
97	W	25	no extreme values	0.75	0.5	0	14	800	1020	880	28	somewhat competent
98	W	26	no extreme values	0.7	0.1	0.2	14	3000	3840	3000	28	somewhat competent
99	M	23	no extreme values	0.4	0.02	0	14	3100	3960	3400	28	somewhat competent
1	M	21	extreme values	0.7	-0.1	0	15	1300	1810	1300	40	somewhat competent
2	W	22	extreme values	0.8	0.3	0	15	3900	5460	4800	40	somewhat competent
3	W	20	extreme values	0.5	0.2	0.2	15	700	970	700	40	somewhat competent
4	W	26	extreme values	NA	NA	0	15	1700	2380	1700	40	somewhat competent
5	M	27	extreme values	0.15	0.05	0	15	260	360	2600	40	somewhat competent
6	W	25	extreme values	0.5	0.1	0	15	3100	4340	3500	40	somewhat competent
7	W	33	extreme values	0.5	0.1	0.1	15	2370	3310	2510	40	somewhat competent
8	W	26	extreme values	0.9	0.2	0	15	3320	4640	3600	40	somewhat competent
9	W	21	extreme values	0.65	0.1	0.35	15	1200	1680	1250	40	somewhat competent
10	W	24	extreme values	0.6	0.2	0	15	1200	1680	1450	40	somewhat competent
11	W	27	extreme values	0.75	0.1	0.35	15	6000	2800	5800	40	somewhat competent
12	W	26	extreme values	0.7	0.1	0	15	1400	1950	1600	40	somewhat competent
13	W	23	extreme values	0.65	0.2	0	15	2850	3980	4200	40	somewhat competent
14	W	27	extreme values	0.6	0.05	0	15	1210	1690	1210	40	somewhat competent
15	W	27	extreme values	0.8	0.2	0.1	15	1300	1810	1400	40	somewhat competent
16	M	21	extreme values	0.65	0.5	0	15	2250	3150	2250	40	somewhat competent
17	W	21	extreme values	0.9	-0.1	0	15	4900	6860	4900	40	somewhat competent
18	M	25	extreme values	0.75	0.2	0	15	4230	5920	45300	40	somewhat competent
19	W	24	extreme values	0.5	0.25	0.25	15	9630	1500	9630	40	somewhat competent
20	W	26	extreme values	0.75	0	0	15	4000	5600	4000	40	somewhat competent
21	W	20	extreme values	0.7	0.1	0	15	790	1100	970	40	somewhat competent
22	W	24	extreme values	0.75	0.3	0	15	3300	4620	3500	40	somewhat competent
23	W	21	extreme values	0.7	0.1	0	15	1870	2610	2340	40	somewhat competent
24	W	21	extreme values	0.6	0.2	0	15	2800	3910	3000	40	somewhat competent
25	W	25	extreme values	0.5	0.3	0.01	15	11500	2500	11500	40	somewhat competent
26	W	30	extreme values	0.6	0	0	15	1900	2660	1900	40	somewhat competent
27	W	29	extreme values	0.7	0.1	0	15	1200	1680	1250	40	somewhat competent
28	W	24	extreme values	0.65	0.3	0	15	2700	3770	2700	40	somewhat competent
29	M	29	extreme values	0.3	0.1	0	15	670	930	820	40	somewhat competent
30	M	24	extreme values	0.65	0.2	0	15	3500	4900	3600	40	somewhat competent
31	M	23	extreme values	0.75	-0.2	0	15	2200	3080	2500	40	somewhat competent
32	W	22	extreme values	0.5	0	0	15	2000	2800	2100	40	somewhat competent
33	M	24	extreme values	0.05	0	0	15	976	1360	976	40	somewhat competent
34	W	27	extreme values	0.6	0	0	15	1500	2100	1800	40	somewhat competent
35	W	30	extreme values	0.5	0	0.25	15	450	630	530	40	somewhat competent
36	W	20	extreme values	0.85	0.1	0.5	15	1960	2740	1960	40	somewhat competent
37	W	24	extreme values	0.2	0	0.3	15	4440	6210	4440	40	somewhat competent
38	W	21	extreme values	0.7	0.05	0	15	2000	2800	2000	40	somewhat competent
39	M	21	extreme values	0.55	0.05	0	15	2300	3220	2400	40	somewhat competent
40	W	22	extreme values	0.8	0.4	0.1	15	2800	3910	3000	40	somewhat competent
41	M	21	extreme values	0.7	0.15	0.1	15	3800	5320	3800	40	somewhat competent
42	M	21	extreme values	0.25	0.1	0	15	3768	5270	4213	40	somewhat competent
43	M	22	extreme values	0.6	-0.1	0	15	3500	4900	3750	40	somewhat competent
44	W	NA	extreme values	0.2	0	0	15	750	1050	750	40	somewhat competent
45	M	23	extreme values	0.7	0	0	15	3300	4620	3300	40	somewhat competent
46	W	23	extreme values	0.93	0.27	0.5	15	6000	600	6000	40	somewhat competent
47	M	21	extreme values	0.4	0.05	0.05	15	4800	6720	5500	40	somewhat competent
48	W	21	extreme values	0.8	0.2	0.1	15	9560	900	9560	40	somewhat competent
49	W	23	no extreme values	0.7	0.1	0.2	15	1600	2240	2000	40	somewhat competent
50	M	21	no extreme values	0.5	0.05	0	15	5400	3600	5400	40	somewhat competent
51	W	25	no extreme values	0.3	0.45	0.1	15	2600	3630	3100	40	somewhat competent
52	M	25	no extreme values	0.45	-1	0.5	15	1300	1810	1450	40	somewhat competent
53	W	24	no extreme values	0.7	0	0	15	800	1120	900	40	somewhat competent
54	W	25	no extreme values	0.7	0.35	0	15	1200	1680	1200	40	somewhat competent
55	W	25	no extreme values	0.8	-0.2	0	15	630	880	630	40	somewhat competent
56	W	27	no extreme values	0.9	0.4	0.6	15	3700	5180	4650	40	somewhat competent
57	W	25	no extreme values	0.8	0.1	0	15	6800	2500	6800	40	somewhat competent
58	W	25	no extreme values	0.3	0.05	0.05	15	4950	6930	4950	40	somewhat competent
59	M	24	no extreme values	0.75	0.05	0	15	700	970	NA	40	somewhat competent
60	M	31	no extreme values	0.85	0.45	0.5	15	990	1380	990	40	somewhat competent
61	W	NA	no extreme values	0.5	0.05	0	15	3500	4900	4000	40	somewhat competent
62	W	24	no extreme values	0.5	0.5	0	15	11000	600	10000	40	somewhat competent
63	W	NA	no extreme values	0.6	0.35	0	15	2700	3770	3100	40	somewhat competent
64	W	26	no extreme values	0.5	0.5	0.5	15	600	840	650	40	somewhat competent
65	W	24	no extreme values	0.5	0.3	0.1	15	2500	3500	3000	40	somewhat competent
66	W	20	no extreme values	0.5	0.7	0	15	3800	5320	4000	40	somewhat competent
67	W	21	no extreme values	0.8	0.5	0	15	890	1240	890	40	somewhat competent
68	W	25	no extreme values	0.75	-0.1	0	15	1950	2730	1950	40	somewhat competent
69	W	21	no extreme values	0.7	0.4	0.5	15	4000	5600	4050	40	somewhat competent
70	W	22	no extreme values	0.8	0	0	15	2080	2910	2150	40	somewhat competent
71	M	23	no extreme values	0.8	0.2	0	15	2900	4050	3100	40	somewhat competent
72	W	28	no extreme values	0.75	0.07	0.35	15	2986	4180	2867	40	somewhat competent
73	W	27	no extreme values	0.9	0.2	0	15	5000	7000	5500	40	somewhat competent
74	W	21	no extreme values	0.8	0.2	0.3	15	800	1120	820	40	somewhat competent
75	M	26	no extreme values	0.6	0.1	0	15	2300	3220	2600	40	somewhat competent
76	W	24	no extreme values	0.5	0.05	0.05	15	3790	5300	4300	40	somewhat competent
77	M	27	no extreme values	0.3	0	0	15	4300	6020	4300	40	somewhat competent
78	M	35	no extreme values	0.5	0.3	0.05	15	3200	4480	3200	40	somewhat competent
79	W	26	no extreme values	0.6	0.2	-0.5	15	4000	5600	4500	40	somewhat competent
80	W	22	no extreme values	0.8	0	0.2	15	1452	2030	1452	40	somewhat competent
81	W	26	no extreme values	0.35	0.5	0.5	15	5000	7000	4990	40	somewhat competent
82	W	24	no extreme values	0.5	0	0	15	4000	5600	4000	40	somewhat competent
83	M	22	no extreme values	0.6	0.2	0	15	2000	2800	2200	40	somewhat competent
84	W	22	no extreme values	0.8	0.1	0	15	2500	3500	2700	40	somewhat competent
85	W	23	no extreme values	0.5	-0.1	0	15	3100	4340	3100	40	somewhat competent
86	W	22	no extreme values	0.69	0.3	0.3	15	2800	3910	3000	40	somewhat competent
87	W	22	no extreme values	0.4	0.2	0	15	3500	4900	3700	40	somewhat competent
88	W	23	no extreme values	0.5	0.1	0	15	3000	4200	3000	40	somewhat competent
89	W	22	no extreme values	0.6	-0.1	0	15	1900	2660	2200	40	somewhat competent
90	W	22	no extreme values	0.25	-0.25	0.05	15	5360	7500	6750	40	somewhat competent
91	W	24	no extreme values	0.7	0	0	15	3000	4200	NA	40	somewhat competent
92	W	20	no extreme values	0.5	0.1	0	15	4300	6020	5000	40	somewhat competent
93	W	26	no extreme values	0.25	-0.1	0	15	3500	4900	3600	40	somewhat competent
94	W	21	no extreme values	0.25	0.25	0	15	4500	6300	4500	40	somewhat competent
95	W	25	no extreme values	0.7	0.5	0.1	15	780	1090	800	40	somewhat competent
96	W	25	no extreme values	0.6	0.2	0.1	15	3000	4200	3000	40	somewhat competent
97	W	25	no extreme values	0.75	0.5	0	15	690	960	750	40	somewhat competent
98	W	26	no extreme values	0.7	0.1	0.2	15	1600	2240	1800	40	somewhat competent
99	M	23	no extreme values	0.4	0.02	0	15	3000	4200	3000	40	somewhat competent
1	M	21	extreme values	0.7	-0.1	0	16	1500	1200	1500	-20	random number
2	W	22	extreme values	0.8	0.3	0	16	2900	2320	2850	-20	random number
3	W	20	extreme values	0.5	0.2	0.2	16	800	640	700	-20	random number
4	W	26	extreme values	NA	NA	0	16	1400	1120	1400	-20	random number
5	M	27	extreme values	0.15	0.05	0	16	2500	2000	2500	-20	random number
6	W	25	extreme values	0.5	0.1	0	16	2800	2240	2300	-20	random number
7	W	33	extreme values	0.5	0.1	0.1	16	3500	2800	3500	-20	random number
8	W	26	extreme values	0.9	0.2	0	16	1950	1560	1950	-20	random number
9	W	21	extreme values	0.65	0.1	0.35	16	1350	1080	1350	-20	random number
10	W	24	extreme values	0.6	0.2	0	16	1800	1440	1780	-20	random number
11	W	27	extreme values	0.75	0.1	0.35	16	5000	4000	4700	-20	random number
12	W	26	extreme values	0.7	0.1	0	16	700	560	700	-20	random number
13	W	23	extreme values	0.65	0.2	0	16	2400	1920	2400	-20	random number
14	W	27	extreme values	0.6	0.05	0	16	790	630	790	-20	random number
15	W	27	extreme values	0.8	0.2	0.1	16	1100	880	1100	-20	random number
16	M	21	extreme values	0.65	0.5	0	16	2405	1920	2405	-20	random number
17	W	21	extreme values	0.9	-0.1	0	16	4500	3600	4500	-20	random number
18	M	25	extreme values	0.75	0.2	0	16	2920	2330	2920	-20	random number
19	W	24	extreme values	0.5	0.25	0.25	16	8560	6840	8560	-20	random number
20	W	26	extreme values	0.75	0	0	16	2000	1600	2000	-20	random number
21	W	20	extreme values	0.7	0.1	0	16	1200	960	1200	-20	random number
22	W	24	extreme values	0.75	0.3	0	16	2600	2080	2600	-20	random number
23	W	21	extreme values	0.7	0.1	0	16	1980	1580	1780	-20	random number
24	W	21	extreme values	0.6	0.2	0	16	2200	1760	NA	-20	random number
25	W	25	extreme values	0.5	0.3	0.01	16	8500	6800	8500	-20	random number
26	W	30	extreme values	0.6	0	0	16	1500	1200	1500	-20	random number
27	W	29	extreme values	0.7	0.1	0	16	700	560	700	-20	random number
28	W	24	extreme values	0.65	0.3	0	16	6200	4960	6200	-20	random number
29	M	29	extreme values	0.3	0.1	0	16	900	720	950	-20	random number
30	M	24	extreme values	0.65	0.2	0	16	1200	960	1200	-20	random number
31	M	23	extreme values	0.75	-0.2	0	16	2300	1840	2300	-20	random number
32	W	22	extreme values	0.5	0	0	16	1400	1120	1400	-20	random number
33	M	24	extreme values	0.05	0	0	16	860	680	860	-20	random number
34	W	27	extreme values	0.6	0	0	16	1800	1440	1800	-20	random number
35	W	30	extreme values	0.5	0	0.25	16	660	520	680	-20	random number
36	W	20	extreme values	0.85	0.1	0.5	16	1260	1000	1190	-20	random number
37	W	24	extreme values	0.2	0	0.3	16	1850	1480	1850	-20	random number
38	W	21	extreme values	0.7	0.05	0	16	1800	1440	1600	-20	random number
39	M	21	extreme values	0.55	0.05	0	16	1400	1120	1400	-20	random number
40	W	22	extreme values	0.8	0.4	0.1	16	1300	1040	1300	-20	random number
41	M	21	extreme values	0.7	0.15	0.1	16	4000	3200	4000	-20	random number
42	M	21	extreme values	0.25	0.1	0	16	4100	3280	4112	-20	random number
43	M	22	extreme values	0.6	-0.1	0	16	1900	1520	1900	-20	random number
44	W	NA	extreme values	0.2	0	0	16	600	480	600	-20	random number
45	M	23	extreme values	0.7	0	0	16	1870	1490	1870	-20	random number
46	W	23	extreme values	0.93	0.27	0.5	16	3000	2400	2500	-20	random number
47	M	21	extreme values	0.4	0.05	0.05	16	5500	4400	5500	-20	random number
48	W	21	extreme values	0.8	0.2	0.1	16	7560	6040	7560	-20	random number
49	W	23	no extreme values	0.7	0.1	0.2	16	2300	1840	2200	-20	random number
50	M	21	no extreme values	0.5	0.05	0	16	3600	2880	3600	-20	random number
51	W	25	no extreme values	0.3	0.45	0.1	16	3500	2800	3200	-20	random number
52	M	25	no extreme values	0.45	-1	0.5	16	1000	800	950	-20	random number
53	W	24	no extreme values	0.7	0	0	16	900	720	900	-20	random number
54	W	25	no extreme values	0.7	0.35	0	16	1000	800	1200	-20	random number
55	W	25	no extreme values	0.8	-0.2	0	16	700	560	700	-20	random number
56	W	27	no extreme values	0.9	0.4	0.6	16	2190	1750	2190	-20	random number
57	W	25	no extreme values	0.8	0.1	0	16	4500	3600	4500	-20	random number
58	W	25	no extreme values	0.3	0.05	0.05	16	3824	3050	3824	-20	random number
59	M	24	no extreme values	0.75	0.05	0	16	800	640	NA	-20	random number
60	M	31	no extreme values	0.85	0.45	0.5	16	890	710	890	-20	random number
61	W	NA	no extreme values	0.5	0.05	0	16	1990	1590	1990	-20	random number
62	W	24	no extreme values	0.5	0.5	0	16	9000	7200	10000	-20	random number
63	W	NA	no extreme values	0.6	0.35	0	16	2100	1680	2100	-20	random number
64	W	26	no extreme values	0.5	0.5	0.5	16	750	600	700	-20	random number
65	W	24	no extreme values	0.5	0.3	0.1	16	2800	2240	2240	-20	random number
66	W	20	no extreme values	0.5	0.7	0	16	5500	4400	5000	-20	random number
67	W	21	no extreme values	0.8	0.5	0	16	1200	960	1200	-20	random number
68	W	25	no extreme values	0.75	-0.1	0	16	990	790	990	-20	random number
69	W	21	no extreme values	0.7	0.4	0.5	16	3900	3120	3020	-20	random number
70	W	22	no extreme values	0.8	0	0	16	1750	1400	1450	-20	random number
71	M	23	no extreme values	0.8	0.2	0	16	2700	2160	2625	-20	random number
72	W	28	no extreme values	0.75	0.07	0.35	16	1689	1350	1703	-20	random number
73	W	27	no extreme values	0.9	0.2	0	16	6000	4800	6000	-20	random number
74	W	21	no extreme values	0.8	0.2	0.3	16	900	720	900	-20	random number
75	M	26	no extreme values	0.6	0.1	0	16	1500	1200	1400	-20	random number
76	W	24	no extreme values	0.5	0.05	0.05	16	2356	1880	2200	-20	random number
77	M	27	no extreme values	0.3	0	0	16	2500	2000	2500	-20	random number
78	M	35	no extreme values	0.5	0.3	0.05	16	2800	2240	1900	-20	random number
79	W	26	no extreme values	0.6	0.2	-0.5	16	4000	3200	4500	-20	random number
80	W	22	no extreme values	0.8	0	0.2	16	1698	1350	1698	-20	random number
81	W	26	no extreme values	0.35	0.5	0.5	16	1450	1160	1450	-20	random number
82	W	24	no extreme values	0.5	0	0	16	3000	2400	3000	-20	random number
83	M	22	no extreme values	0.6	0.2	0	16	1700	1360	NA	-20	random number
84	W	22	no extreme values	0.8	0.1	0	16	1600	1280	1600	-20	random number
85	W	23	no extreme values	0.5	-0.1	0	16	1800	1440	1600	-20	random number
86	W	22	no extreme values	0.69	0.3	0.3	16	2800	2240	2800	-20	random number
87	W	22	no extreme values	0.4	0.2	0	16	2000	1600	2000	-20	random number
88	W	23	no extreme values	0.5	0.1	0	16	2000	1600	2000	-20	random number
89	W	22	no extreme values	0.6	-0.1	0	16	1300	1040	1300	-20	random number
90	W	22	no extreme values	0.25	-0.25	0.05	16	4620	3690	3950	-20	random number
91	W	24	no extreme values	0.7	0	0	16	2000	1600	2000	-20	random number
92	W	20	no extreme values	0.5	0.1	0	16	3000	2400	NA	-20	random number
93	W	26	no extreme values	0.25	-0.1	0	16	1700	1360	1700	-20	random number
94	W	21	no extreme values	0.25	0.25	0	16	7543	6030	6998	-20	random number
95	W	25	no extreme values	0.7	0.5	0.1	16	2800	2240	2500	-20	random number
96	W	25	no extreme values	0.6	0.2	0.1	16	2000	1600	2000	-20	random number
97	W	25	no extreme values	0.75	0.5	0	16	1020	810	1020	-20	random number
98	W	26	no extreme values	0.7	0.1	0.2	16	2000	1600	2000	-20	random number
99	M	23	no extreme values	0.4	0.02	0	16	1300	1040	1300	-20	random number
1	M	21	extreme values	0.7	-0.1	0	17	400	500	450	26	competent
2	W	22	extreme values	0.8	0.3	0	17	400	500	450	26	competent
3	W	20	extreme values	0.5	0.2	0.2	17	400	500	450	26	competent
4	W	26	extreme values	NA	NA	0	17	700	880	800	26	competent
5	M	27	extreme values	0.15	0.05	0	17	900	1130	950	26	competent
6	W	25	extreme values	0.5	0.1	0	17	1000	1260	1350	26	competent
7	W	33	extreme values	0.5	0.1	0.1	17	1230	1540	1350	26	competent
8	W	26	extreme values	0.9	0.2	0	17	330	410	360	26	competent
9	W	21	extreme values	0.65	0.1	0.35	17	250	310	300	26	competent
10	W	24	extreme values	0.6	0.2	0	17	NA	3900	700	26	competent
11	W	27	extreme values	0.75	0.1	0.35	17	2300	2890	2800	26	competent
12	W	26	extreme values	0.7	0.1	0	17	400	500	500	26	competent
13	W	23	extreme values	0.65	0.2	0	17	250	310	285	26	competent
14	W	27	extreme values	0.6	0.05	0	17	NA	160	NA	26	competent
15	W	27	extreme values	0.8	0.2	0.1	17	500	630	600	26	competent
16	M	21	extreme values	0.65	0.5	0	17	1130	1420	1250	26	competent
17	W	21	extreme values	0.9	-0.1	0	17	2300	2890	2300	26	competent
18	M	25	extreme values	0.75	0.2	0	17	953	1200	1023	26	competent
19	W	24	extreme values	0.5	0.25	0.25	17	3620	4560	4000	26	competent
20	W	26	extreme values	0.75	0	0	17	1000	1260	1100	26	competent
21	W	20	extreme values	0.7	0.1	0	17	700	880	760	26	competent
22	W	24	extreme values	0.75	0.3	0	17	860	1080	860	26	competent
23	W	21	extreme values	0.7	0.1	0	17	700	880	800	26	competent
24	W	21	extreme values	0.6	0.2	0	17	1300	1630	1450	26	competent
25	W	25	extreme values	0.5	0.3	0.01	17	1300	1630	1300	26	competent
26	W	30	extreme values	0.6	0	0	17	700	880	800	26	competent
27	W	29	extreme values	0.7	0.1	0	17	250	310	300	26	competent
28	W	24	extreme values	0.65	0.3	0	17	1420	1780	1560	26	competent
29	M	29	extreme values	0.3	0.1	0	17	365	450	366	26	competent
30	M	24	extreme values	0.65	0.2	0	17	1100	1380	1100	26	competent
31	M	23	extreme values	0.75	-0.2	0	17	600	750	650	26	competent
32	W	22	extreme values	0.5	0	0	17	1000	1260	11000	26	competent
33	M	24	extreme values	0.05	0	0	17	380	470	380	26	competent
34	W	27	extreme values	0.6	0	0	17	800	1000	800	26	competent
35	W	30	extreme values	0.5	0	0.25	17	NA	180	NA	26	competent
36	W	20	extreme values	0.85	0.1	0.5	17	930	1170	930	26	competent
37	W	24	extreme values	0.2	0	0.3	17	1780	2240	1890	26	competent
38	W	21	extreme values	0.7	0.05	0	17	700	880	800	26	competent
39	M	21	extreme values	0.55	0.05	0	17	400	500	430	26	competent
40	W	22	extreme values	0.8	0.4	0.1	17	1000	1260	1100	26	competent
41	M	21	extreme values	0.7	0.15	0.1	17	1200	1510	1400	26	competent
42	M	21	extreme values	0.25	0.1	0	17	560	700	600	26	competent
43	M	22	extreme values	0.6	-0.1	0	17	450	560	510	26	competent
44	W	NA	extreme values	0.2	0	0	17	300	370	310	26	competent
45	M	23	extreme values	0.7	0	0	17	1100	1380	1150	26	competent
46	W	23	extreme values	0.93	0.27	0.5	17	3000	3780	3800	26	competent
47	M	21	extreme values	0.4	0.05	0.05	17	900	1130	950	26	competent
48	W	21	extreme values	0.8	0.2	0.1	17	956	1200	956	26	competent
49	W	23	no extreme values	0.7	0.1	0.2	17	250	310	310	26	competent
50	M	21	no extreme values	0.5	0.05	0	17	1050	1320	1180	26	competent
51	W	25	no extreme values	0.3	0.45	0.1	17	1800	2260	1850	26	competent
52	M	25	no extreme values	0.45	-1	0.5	17	650	810	786	26	competent
53	W	24	no extreme values	0.7	0	0	17	450	560	500	26	competent
54	W	25	no extreme values	0.7	0.35	0	17	NA	120	NA	26	competent
55	W	25	no extreme values	0.8	-0.2	0	17	340	420	400	26	competent
56	W	27	no extreme values	0.9	0.4	0.6	17	1640	2060	1900	26	competent
57	W	25	no extreme values	0.8	0.1	0	17	2900	3650	3400	26	competent
58	W	25	no extreme values	0.3	0.05	0.05	17	1412	1770	1412	26	competent
59	M	24	no extreme values	0.75	0.05	0	17	400	500	NA	26	competent
60	M	31	no extreme values	0.85	0.45	0.5	17	580	730	640	26	competent
61	W	NA	no extreme values	0.5	0.05	0	17	NA	220	NA	26	competent
62	W	24	no extreme values	0.5	0.5	0	17	3500	4410	4000	26	competent
63	W	NA	no extreme values	0.6	0.35	0	17	550	690	600	26	competent
64	W	26	no extreme values	0.5	0.5	0.5	17	500	630	550	26	competent
65	W	24	no extreme values	0.5	0.3	0.1	17	1111	1390	1200	26	competent
66	W	20	no extreme values	0.5	0.7	0	17	1800	2260	1800	26	competent
67	W	21	no extreme values	0.8	0.5	0	17	400	500	465	26	competent
68	W	25	no extreme values	0.75	-0.1	0	17	500	630	500	26	competent
69	W	21	no extreme values	0.7	0.4	0.5	17	1600	2010	1600	26	competent
70	W	22	no extreme values	0.8	0	0	17	350	440	390	26	competent
71	M	23	no extreme values	0.8	0.2	0	17	425	530	480	26	competent
72	W	28	no extreme values	0.75	0.07	0.35	17	879	1100	1098	26	competent
73	W	27	no extreme values	0.9	0.2	0	17	3000	3780	3600	26	competent
74	W	21	no extreme values	0.8	0.2	0.3	17	500	630	590	26	competent
75	M	26	no extreme values	0.6	0.1	0	17	950	1190	1050	26	competent
76	W	24	no extreme values	0.5	0.05	0.05	17	319	400	340	26	competent
77	M	27	no extreme values	0.3	0	0	17	1100	1380	1100	26	competent
78	M	35	no extreme values	0.5	0.3	0.05	17	1400	1760	1460	26	competent
79	W	26	no extreme values	0.6	0.2	-0.5	17	800	1000	850	26	competent
80	W	22	no extreme values	0.8	0	0.2	17	965	1210	1222	26	competent
81	W	26	no extreme values	0.35	0.5	0.5	17	680	850	740	26	competent
82	W	24	no extreme values	0.5	0	0	17	1200	1510	1200	26	competent
83	M	22	no extreme values	0.6	0.2	0	17	600	750	NA	26	competent
84	W	22	no extreme values	0.8	0.1	0	17	600	750	700	26	competent
85	W	23	no extreme values	0.5	-0.1	0	17	700	880	750	26	competent
86	W	22	no extreme values	0.69	0.3	0.3	17	700	880	780	26	competent
87	W	22	no extreme values	0.4	0.2	0	17	700	880	750	26	competent
88	W	23	no extreme values	0.5	0.1	0	17	1500	1890	2000	26	competent
89	W	22	no extreme values	0.6	-0.1	0	17	450	560	480	26	competent
90	W	22	no extreme values	0.25	-0.25	0.05	17	3120	3930	3850	26	competent
91	W	24	no extreme values	0.7	0	0	17	900	1130	1000	26	competent
92	W	20	no extreme values	0.5	0.1	0	17	1870	2350	2170	26	competent
93	W	26	no extreme values	0.25	-0.1	0	17	800	1000	900	26	competent
94	W	21	no extreme values	0.25	0.25	0	17	3066	3860	3600	26	competent
95	W	25	no extreme values	0.7	0.5	0.1	17	900	1130	950	26	competent
96	W	25	no extreme values	0.6	0.2	0.1	17	850	1070	900	26	competent
97	W	25	no extreme values	0.75	0.5	0	17	700	880	750	26	competent
98	W	26	no extreme values	0.7	0.1	0.2	17	1000	1260	1100	26	competent
99	M	23	no extreme values	0.4	0.02	0	17	600	750	620	26	competent
1	M	21	extreme values	0.7	-0.1	0	18	500	320	500	-36	random number
2	W	22	extreme values	0.8	0.3	0	18	750	480	750	-36	random number
3	W	20	extreme values	0.5	0.2	0.2	18	350	220	350	-36	random number
4	W	26	extreme values	NA	NA	0	18	1000	640	1000	-36	random number
5	M	27	extreme values	0.15	0.05	0	18	950	600	950	-36	random number
6	W	25	extreme values	0.5	0.1	0	18	1200	760	1350	-36	random number
7	W	33	extreme values	0.5	0.1	0.1	18	1500	960	1500	-36	random number
8	W	26	extreme values	0.9	0.2	0	18	430	270	300	-36	random number
9	W	21	extreme values	0.65	0.1	0.35	18	600	380	600	-36	random number
10	W	24	extreme values	0.6	0.2	0	18	1000	640	1000	-36	random number
11	W	27	extreme values	0.75	0.1	0.35	18	3100	1980	3000	-36	random number
12	W	26	extreme values	0.7	0.1	0	18	300	190	300	-36	random number
13	W	23	extreme values	0.65	0.2	0	18	560	350	560	-36	random number
14	W	27	extreme values	0.6	0.05	0	18	210	130	210	-36	random number
15	W	27	extreme values	0.8	0.2	0.1	18	250	160	240	-36	random number
16	M	21	extreme values	0.65	0.5	0	18	1400	890	1550	-36	random number
17	W	21	extreme values	0.9	-0.1	0	18	2900	1850	2900	-36	random number
18	M	25	extreme values	0.75	0.2	0	18	1530	970	1530	-36	random number
19	W	24	extreme values	0.5	0.25	0.25	18	2500	1600	2500	-36	random number
20	W	26	extreme values	0.75	0	0	18	1200	760	1200	-36	random number
21	W	20	extreme values	0.7	0.1	0	18	750	480	750	-36	random number
22	W	24	extreme values	0.75	0.3	0	18	1600	1020	1600	-36	random number
23	W	21	extreme values	0.7	0.1	0	18	870	550	800	-36	random number
24	W	21	extreme values	0.6	0.2	0	18	1100	700	1100	-36	random number
25	W	25	extreme values	0.5	0.3	0.01	18	1700	1080	1700	-36	random number
26	W	30	extreme values	0.6	0	0	18	1200	760	1000	-36	random number
27	W	29	extreme values	0.7	0.1	0	18	680	430	680	-36	random number
28	W	24	extreme values	0.65	0.3	0	18	690	440	690	-36	random number
29	M	29	extreme values	0.3	0.1	0	18	690	440	700	-36	random number
30	M	24	extreme values	0.65	0.2	0	18	2000	1280	2000	-36	random number
31	M	23	extreme values	0.75	-0.2	0	18	1200	760	1200	-36	random number
32	W	22	extreme values	0.5	0	0	18	1200	760	1200	-36	random number
33	M	24	extreme values	0.05	0	0	18	590	370	590	-36	random number
34	W	27	extreme values	0.6	0	0	18	900	570	900	-36	random number
35	W	30	extreme values	0.5	0	0.25	18	200	120	200	-36	random number
36	W	20	extreme values	0.85	0.1	0.5	18	1100	700	900	-36	random number
37	W	24	extreme values	0.2	0	0.3	18	2115	1350	2115	-36	random number
38	W	21	extreme values	0.7	0.05	0	18	650	410	600	-36	random number
39	M	21	extreme values	0.55	0.05	0	18	400	250	400	-36	random number
40	W	22	extreme values	0.8	0.4	0.1	18	700	440	650	-36	random number
41	M	21	extreme values	0.7	0.15	0.1	18	2200	1400	1980	-36	random number
42	M	21	extreme values	0.25	0.1	0	18	1100	700	1100	-36	random number
43	M	22	extreme values	0.6	-0.1	0	18	890	560	890	-36	random number
44	W	NA	extreme values	0.2	0	0	18	300	190	300	-36	random number
45	M	23	extreme values	0.7	0	0	18	740	470	740	-36	random number
46	W	23	extreme values	0.93	0.27	0.5	18	2500	1600	2800	-36	random number
47	M	21	extreme values	0.4	0.05	0.05	18	1000	640	1000	-36	random number
48	W	21	extreme values	0.8	0.2	0.1	18	1200	760	1200	-36	random number
49	W	23	no extreme values	0.7	0.1	0.2	18	550	350	550	-36	random number
50	M	21	no extreme values	0.5	0.05	0	18	2400	1530	2400	-36	random number
51	W	25	no extreme values	0.3	0.45	0.1	18	1050	670	850	-36	random number
52	M	25	no extreme values	0.45	-1	0.5	18	890	560	750	-36	random number
53	W	24	no extreme values	0.7	0	0	18	400	250	380	-36	random number
54	W	25	no extreme values	0.7	0.35	0	18	700	440	650	-36	random number
55	W	25	no extreme values	0.8	-0.2	0	18	290	180	290	-36	random number
56	W	27	no extreme values	0.9	0.4	0.6	18	1900	1210	1690	-36	random number
57	W	25	no extreme values	0.8	0.1	0	18	3000	1920	2800	-36	random number
58	W	25	no extreme values	0.3	0.05	0.05	18	1750	1120	1750	-36	random number
59	M	24	no extreme values	0.75	0.05	0	18	560	350	NA	-36	random number
60	M	31	no extreme values	0.85	0.45	0.5	18	660	420	600	-36	random number
61	W	NA	no extreme values	0.5	0.05	0	18	260	160	250	-36	random number
62	W	24	no extreme values	0.5	0.5	0	18	3500	2240	3000	-36	random number
63	W	NA	no extreme values	0.6	0.35	0	18	900	570	800	-36	random number
64	W	26	no extreme values	0.5	0.5	0.5	18	300	190	300	-36	random number
65	W	24	no extreme values	0.5	0.3	0.1	18	500	320	500	-36	random number
66	W	20	no extreme values	0.5	0.7	0	18	2000	1280	1500	-36	random number
67	W	21	no extreme values	0.8	0.5	0	18	300	190	300	-36	random number
68	W	25	no extreme values	0.75	-0.1	0	18	930	590	930	-36	random number
69	W	21	no extreme values	0.7	0.4	0.5	18	1543	980	980	-36	random number
70	W	22	no extreme values	0.8	0	0	18	NA	110	NA	-36	random number
71	M	23	no extreme values	0.8	0.2	0	18	900	570	915	-36	random number
72	W	28	no extreme values	0.75	0.07	0.35	18	1274	810	1300	-36	random number
73	W	27	no extreme values	0.9	0.2	0	18	3000	1920	3000	-36	random number
74	W	21	no extreme values	0.8	0.2	0.3	18	600	380	590	-36	random number
75	M	26	no extreme values	0.6	0.1	0	18	860	550	750	-36	random number
76	W	24	no extreme values	0.5	0.05	0.05	18	1380	880	1380	-36	random number
77	M	27	no extreme values	0.3	0	0	18	1200	760	1200	-36	random number
78	M	35	no extreme values	0.5	0.3	0.05	18	1600	1020	1600	-36	random number
79	W	26	no extreme values	0.6	0.2	-0.5	18	1000	640	950	-36	random number
80	W	22	no extreme values	0.8	0	0.2	18	1563	1000	1563	-36	random number
81	W	26	no extreme values	0.35	0.5	0.5	18	800	510	780	-36	random number
82	W	24	no extreme values	0.5	0	0	18	2000	1280	2000	-36	random number
83	M	22	no extreme values	0.6	0.2	0	18	800	510	800	-36	random number
84	W	22	no extreme values	0.8	0.1	0	18	700	440	500	-36	random number
85	W	23	no extreme values	0.5	-0.1	0	18	900	570	900	-36	random number
86	W	22	no extreme values	0.69	0.3	0.3	18	750	480	750	-36	random number
87	W	22	no extreme values	0.4	0.2	0	18	1200	760	1200	-36	random number
88	W	23	no extreme values	0.5	0.1	0	18	1000	640	1000	-36	random number
89	W	22	no extreme values	0.6	-0.1	0	18	550	350	550	-36	random number
90	W	22	no extreme values	0.25	-0.25	0.05	18	2460	1570	2010	-36	random number
91	W	24	no extreme values	0.7	0	0	18	1200	760	1200	-36	random number
92	W	20	no extreme values	0.5	0.1	0	18	990	630	870	-36	random number
93	W	26	no extreme values	0.25	-0.1	0	18	1300	830	1300	-36	random number
94	W	21	no extreme values	0.25	0.25	0	18	3988	2550	2990	-36	random number
95	W	25	no extreme values	0.7	0.5	0.1	18	950	600	950	-36	random number
96	W	25	no extreme values	0.6	0.2	0.1	18	700	440	700	-36	random number
97	W	25	no extreme values	0.75	0.5	0	18	800	510	800	-36	random number
98	W	26	no extreme values	0.7	0.1	0.2	18	600	380	500	-36	random number
99	M	23	no extreme values	0.4	0.02	0	18	610	390	600	-36	random number
1	M	21	extreme values	0.7	-0.1	0	19	800	940	850	18	competent
2	W	22	extreme values	0.8	0.3	0	19	900	1060	1000	18	competent
3	W	20	extreme values	0.5	0.2	0.2	19	600	700	600	18	competent
4	W	26	extreme values	NA	NA	0	19	1000	1180	1100	18	competent
5	M	27	extreme values	0.15	0.05	0	19	1500	1770	1500	18	competent
6	W	25	extreme values	0.5	0.1	0	19	2300	2710	2700	18	competent
7	W	33	extreme values	0.5	0.1	0.1	19	2300	2710	2480	18	competent
8	W	26	extreme values	0.9	0.2	0	19	1120	1320	1220	18	competent
9	W	21	extreme values	0.65	0.1	0.35	19	1000	1180	1100	18	competent
10	W	24	extreme values	0.6	0.2	0	19	1800	2120	1950	18	competent
11	W	27	extreme values	0.75	0.1	0.35	19	3800	4480	4400	18	competent
12	W	26	extreme values	0.7	0.1	0	19	250	290	260	18	competent
13	W	23	extreme values	0.65	0.2	0	19	3220	3790	3580	18	competent
14	W	27	extreme values	0.6	0.05	0	19	350	410	385	18	competent
15	W	27	extreme values	0.8	0.2	0.1	19	220	250	230	18	competent
16	M	21	extreme values	0.65	0.5	0	19	2875	3390	3000	18	competent
17	W	21	extreme values	0.9	-0.1	0	19	3000	3540	3150	18	competent
18	M	25	extreme values	0.75	0.2	0	19	1560	1840	1600	18	competent
19	W	24	extreme values	0.5	0.25	0.25	19	6250	7370	6950	18	competent
20	W	26	extreme values	0.75	0	0	19	2500	2950	2600	18	competent
21	W	20	extreme values	0.7	0.1	0	19	750	880	820	18	competent
22	W	24	extreme values	0.75	0.3	0	19	200	230	2000	18	competent
23	W	21	extreme values	0.7	0.1	0	19	1300	1530	1480	18	competent
24	W	21	extreme values	0.6	0.2	0	19	1500	1770	1600	18	competent
25	W	25	extreme values	0.5	0.3	0.01	19	1150	1350	1150	18	competent
26	W	30	extreme values	0.6	0	0	19	800	940	850	18	competent
27	W	29	extreme values	0.7	0.1	0	19	700	820	800	18	competent
28	W	24	extreme values	0.65	0.3	0	19	2200	2590	2200	18	competent
29	M	29	extreme values	0.3	0.1	0	19	590	690	620	18	competent
30	M	24	extreme values	0.65	0.2	0	19	2300	2710	2400	18	competent
31	M	23	extreme values	0.75	-0.2	0	19	2600	3060	2900	18	competent
32	W	22	extreme values	0.5	0	0	19	1400	1650	1400	18	competent
33	M	24	extreme values	0.05	0	0	19	560	660	560	18	competent
34	W	27	extreme values	0.6	0	0	19	750	880	750	18	competent
35	W	30	extreme values	0.5	0	0.25	19	600	700	650	18	competent
36	W	20	extreme values	0.85	0.1	0.5	19	1990	2340	2270	18	competent
37	W	24	extreme values	0.2	0	0.3	19	545	640	545	18	competent
38	W	21	extreme values	0.7	0.05	0	19	300	350	340	18	competent
39	M	21	extreme values	0.55	0.05	0	19	1500	1770	1550	18	competent
40	W	22	extreme values	0.8	0.4	0.1	19	500	590	500	18	competent
41	M	21	extreme values	0.7	0.15	0.1	19	3030	3570	3300	18	competent
42	M	21	extreme values	0.25	0.1	0	19	3400	4010	3600	18	competent
43	M	22	extreme values	0.6	-0.1	0	19	600	700	650	18	competent
44	W	NA	extreme values	0.2	0	0	19	400	470	420	18	competent
45	M	23	extreme values	0.7	0	0	19	2560	3020	2700	18	competent
46	W	23	extreme values	0.93	0.27	0.5	19	3500	4130	4000	18	competent
47	M	21	extreme values	0.4	0.05	0.05	19	4280	5050	4650	18	competent
48	W	21	extreme values	0.8	0.2	0.1	19	3645	4300	4000	18	competent
49	W	23	no extreme values	0.7	0.1	0.2	19	950	1120	1050	18	competent
50	M	21	no extreme values	0.5	0.05	0	19	1950	2300	2150	18	competent
51	W	25	no extreme values	0.3	0.45	0.1	19	1900	2240	1901	18	competent
52	M	25	no extreme values	0.45	-1	0.5	19	600	700	620	18	competent
53	W	24	no extreme values	0.7	0	0	19	500	590	570	18	competent
54	W	25	no extreme values	0.7	0.35	0	19	1300	1530	1480	18	competent
55	W	25	no extreme values	0.8	-0.2	0	19	650	760	740	18	competent
56	W	27	no extreme values	0.9	0.4	0.6	19	740	870	740	18	competent
57	W	25	no extreme values	0.8	0.1	0	19	2000	2360	2100	18	competent
58	W	25	no extreme values	0.3	0.05	0.05	19	2980	3510	2980	18	competent
59	M	24	no extreme values	0.75	0.05	0	19	500	590	NA	18	competent
60	M	31	no extreme values	0.85	0.45	0.5	19	390	460	420	18	competent
61	W	NA	no extreme values	0.5	0.05	0	19	1000	1180	1000	18	competent
62	W	24	no extreme values	0.5	0.5	0	19	8500	3200	7000	18	competent
63	W	NA	no extreme values	0.6	0.35	0	19	2100	2470	2300	18	competent
64	W	26	no extreme values	0.5	0.5	0.5	19	200	230	200	18	competent
65	W	24	no extreme values	0.5	0.3	0.1	19	1800	2120	1900	18	competent
66	W	20	no extreme values	0.5	0.7	0	19	3500	4130	3800	18	competent
67	W	21	no extreme values	0.8	0.5	0	19	370	430	410	18	competent
68	W	25	no extreme values	0.75	-0.1	0	19	1000	1180	1100	18	competent
69	W	21	no extreme values	0.7	0.4	0.5	19	600	700	650	18	competent
70	W	22	no extreme values	0.8	0	0	19	1120	1320	1250	18	competent
71	M	23	no extreme values	0.8	0.2	0	19	2115	2490	2300	18	competent
72	W	28	no extreme values	0.75	0.07	0.35	19	2648	3120	2857	18	competent
73	W	27	no extreme values	0.9	0.2	0	19	1500	1770	1700	18	competent
74	W	21	no extreme values	0.8	0.2	0.3	19	960	1130	1090	18	competent
75	M	26	no extreme values	0.6	0.1	0	19	800	940	880	18	competent
76	W	24	no extreme values	0.5	0.05	0.05	19	869	1020	978	18	competent
77	M	27	no extreme values	0.3	0	0	19	800	940	800	18	competent
78	M	35	no extreme values	0.5	0.3	0.05	19	900	1060	900	18	competent
79	W	26	no extreme values	0.6	0.2	-0.5	19	1000	1180	1000	18	competent
80	W	22	no extreme values	0.8	0	0.2	19	1546	1820	1820	18	competent
81	W	26	no extreme values	0.35	0.5	0.5	19	700	820	745	18	competent
82	W	24	no extreme values	0.5	0	0	19	1450	1710	1450	18	competent
83	M	22	no extreme values	0.6	0.2	0	19	550	640	590	18	competent
84	W	22	no extreme values	0.8	0.1	0	19	1500	1770	1600	18	competent
85	W	23	no extreme values	0.5	-0.1	0	19	2800	3300	2900	18	competent
86	W	22	no extreme values	0.69	0.3	0.3	19	750	880	780	18	competent
87	W	22	no extreme values	0.4	0.2	0	19	3200	3770	3500	18	competent
88	W	23	no extreme values	0.5	0.1	0	19	700	820	800	18	competent
89	W	22	no extreme values	0.6	-0.1	0	19	500	590	520	18	competent
90	W	22	no extreme values	0.25	-0.25	0.05	19	3160	3720	3650	18	competent
91	W	24	no extreme values	0.7	0	0	19	1400	1650	1500	18	competent
92	W	20	no extreme values	0.5	0.1	0	19	2400	2830	NA	18	competent
93	W	26	no extreme values	0.25	-0.1	0	19	1950	2300	2100	18	competent
94	W	21	no extreme values	0.25	0.25	0	19	2000	2360	2000	18	competent
95	W	25	no extreme values	0.7	0.5	0.1	19	700	820	750	18	competent
96	W	25	no extreme values	0.6	0.2	0.1	19	2000	2360	2000	18	competent
97	W	25	no extreme values	0.75	0.5	0	19	600	700	650	18	competent
98	W	26	no extreme values	0.7	0.1	0.2	19	3000	3540	3100	18	competent
99	M	23	no extreme values	0.4	0.02	0	19	750	880	800	18	competent
1	M	21	extreme values	0.7	-0.1	0	20	650	440	650	-32	somewhat competent
2	W	22	extreme values	0.8	0.3	0	20	999	670	799	-32	somewhat competent
3	W	20	extreme values	0.5	0.2	0.2	20	500	330	450	-32	somewhat competent
4	W	26	extreme values	NA	NA	0	20	700	470	700	-32	somewhat competent
5	M	27	extreme values	0.15	0.05	0	20	1100	740	1050	-32	somewhat competent
6	W	25	extreme values	0.5	0.1	0	20	2640	1790	2000	-32	somewhat competent
7	W	33	extreme values	0.5	0.1	0.1	20	1900	1290	1850	-32	somewhat competent
8	W	26	extreme values	0.9	0.2	0	20	754	510	730	-32	somewhat competent
9	W	21	extreme values	0.65	0.1	0.35	20	1000	670	1000	-32	somewhat competent
10	W	24	extreme values	0.6	0.2	0	20	1700	1150	1550	-32	somewhat competent
11	W	27	extreme values	0.75	0.1	0.35	20	4500	3050	4500	-32	somewhat competent
12	W	26	extreme values	0.7	0.1	0	20	800	540	800	-32	somewhat competent
13	W	23	extreme values	0.65	0.2	0	20	1200	810	1060	-32	somewhat competent
14	W	27	extreme values	0.6	0.05	0	20	780	530	700	-32	somewhat competent
15	W	27	extreme values	0.8	0.2	0.1	20	350	230	350	-32	somewhat competent
16	M	21	extreme values	0.65	0.5	0	20	1500	1010	1500	-32	somewhat competent
17	W	21	extreme values	0.9	-0.1	0	20	3800	2580	NA	-32	somewhat competent
18	M	25	extreme values	0.75	0.2	0	20	1980	1340	1980	-32	somewhat competent
19	W	24	extreme values	0.5	0.25	0.25	20	4256	2890	4200	-32	somewhat competent
20	W	26	extreme values	0.75	0	0	20	1000	670	1000	-32	somewhat competent
21	W	20	extreme values	0.7	0.1	0	20	440	290	360	-32	somewhat competent
22	W	24	extreme values	0.75	0.3	0	20	1950	1320	1950	-32	somewhat competent
23	W	21	extreme values	0.7	0.1	0	20	1340	910	1200	-32	somewhat competent
24	W	21	extreme values	0.6	0.2	0	20	700	470	650	-32	somewhat competent
25	W	25	extreme values	0.5	0.3	0.01	20	5500	3730	5500	-32	somewhat competent
26	W	30	extreme values	0.6	0	0	20	850	570	700	-32	somewhat competent
27	W	29	extreme values	0.7	0.1	0	20	650	440	550	-32	somewhat competent
28	W	24	extreme values	0.65	0.3	0	20	3520	2390	3520	-32	somewhat competent
29	M	29	extreme values	0.3	0.1	0	20	400	270	350	-32	somewhat competent
30	M	24	extreme values	0.65	0.2	0	20	1000	670	900	-32	somewhat competent
31	M	23	extreme values	0.75	-0.2	0	20	1800	1220	1400	-32	somewhat competent
32	W	22	extreme values	0.5	0	0	20	1200	810	1200	-32	somewhat competent
33	M	24	extreme values	0.05	0	0	20	520	350	520	-32	somewhat competent
34	W	27	extreme values	0.6	0	0	20	750	500	750	-32	somewhat competent
35	W	30	extreme values	0.5	0	0.25	20	NA	100	NA	-32	somewhat competent
36	W	20	extreme values	0.85	0.1	0.5	20	2330	1580	2330	-32	somewhat competent
37	W	24	extreme values	0.2	0	0.3	20	650	440	730	-32	somewhat competent
38	W	21	extreme values	0.7	0.05	0	20	450	300	450	-32	somewhat competent
39	M	21	extreme values	0.55	0.05	0	20	400	270	400	-32	somewhat competent
40	W	22	extreme values	0.8	0.4	0.1	20	700	470	600	-32	somewhat competent
41	M	21	extreme values	0.7	0.15	0.1	20	2700	1830	2700	-32	somewhat competent
42	M	21	extreme values	0.25	0.1	0	20	2000	1350	2000	-32	somewhat competent
43	M	22	extreme values	0.6	-0.1	0	20	580	390	460	-32	somewhat competent
44	W	NA	extreme values	0.2	0	0	20	600	400	600	-32	somewhat competent
45	M	23	extreme values	0.7	0	0	20	480	320	480	-32	somewhat competent
46	W	23	extreme values	0.93	0.27	0.5	20	3000	2030	2700	-32	somewhat competent
47	M	21	extreme values	0.4	0.05	0.05	20	1450	980	1400	-32	somewhat competent
48	W	21	extreme values	0.8	0.2	0.1	20	2659	1800	3000	-32	somewhat competent
49	W	23	no extreme values	0.7	0.1	0.2	20	960	650	800	-32	somewhat competent
50	M	21	no extreme values	0.5	0.05	0	20	2750	1860	2750	-32	somewhat competent
51	W	25	no extreme values	0.3	0.45	0.1	20	2100	1420	1950	-32	somewhat competent
52	M	25	no extreme values	0.45	-1	0.5	20	400	270	400	-32	somewhat competent
53	W	24	no extreme values	0.7	0	0	20	380	250	380	-32	somewhat competent
54	W	25	no extreme values	0.7	0.35	0	20	1400	950	1220	-32	somewhat competent
55	W	25	no extreme values	0.8	-0.2	0	20	480	320	480	-32	somewhat competent
56	W	27	no extreme values	0.9	0.4	0.6	20	1400	950	1240	-32	somewhat competent
57	W	25	no extreme values	0.8	0.1	0	20	3220	2180	3220	-32	somewhat competent
58	W	25	no extreme values	0.3	0.05	0.05	20	2400	1630	2400	-32	somewhat competent
59	M	24	no extreme values	0.75	0.05	0	20	300	200	NA	-32	somewhat competent
60	M	31	no extreme values	0.85	0.45	0.5	20	440	290	400	-32	somewhat competent
61	W	NA	no extreme values	0.5	0.05	0	20	520	350	520	-32	somewhat competent
62	W	24	no extreme values	0.5	0.5	0	20	4500	3050	4000	-32	somewhat competent
63	W	NA	no extreme values	0.6	0.35	0	20	800	540	700	-32	somewhat competent
64	W	26	no extreme values	0.5	0.5	0.5	20	NA	3100	NA	-32	somewhat competent
65	W	24	no extreme values	0.5	0.3	0.1	20	1000	670	910	-32	somewhat competent
66	W	20	no extreme values	0.5	0.7	0	20	2400	1630	2500	-32	somewhat competent
67	W	21	no extreme values	0.8	0.5	0	20	240	160	270	-32	somewhat competent
68	W	25	no extreme values	0.75	-0.1	0	20	780	530	780	-32	somewhat competent
69	W	21	no extreme values	0.7	0.4	0.5	20	700	470	700	-32	somewhat competent
70	W	22	no extreme values	0.8	0	0	20	680	460	580	-32	somewhat competent
71	M	23	no extreme values	0.8	0.2	0	20	800	540	800	-32	somewhat competent
72	W	28	no extreme values	0.75	0.07	0.35	20	876	590	890	-32	somewhat competent
73	W	27	no extreme values	0.9	0.2	0	20	1800	1220	1700	-32	somewhat competent
74	W	21	no extreme values	0.8	0.2	0.3	20	1010	680	900	-32	somewhat competent
75	M	26	no extreme values	0.6	0.1	0	20	600	400	580	-32	somewhat competent
76	W	24	no extreme values	0.5	0.05	0.05	20	2456	1670	2089	-32	somewhat competent
77	M	27	no extreme values	0.3	0	0	20	800	540	800	-32	somewhat competent
78	M	35	no extreme values	0.5	0.3	0.05	20	1200	810	1100	-32	somewhat competent
79	W	26	no extreme values	0.6	0.2	-0.5	20	700	470	700	-32	somewhat competent
80	W	22	no extreme values	0.8	0	0.2	20	1456	990	1456	-32	somewhat competent
81	W	26	no extreme values	0.35	0.5	0.5	20	1000	670	1100	-32	somewhat competent
82	W	24	no extreme values	0.5	0	0	20	2150	1460	2150	-32	somewhat competent
83	M	22	no extreme values	0.6	0.2	0	20	800	540	750	-32	somewhat competent
84	W	22	no extreme values	0.8	0.1	0	20	600	400	550	-32	somewhat competent
85	W	23	no extreme values	0.5	-0.1	0	20	1300	880	1300	-32	somewhat competent
86	W	22	no extreme values	0.69	0.3	0.3	20	800	540	800	-32	somewhat competent
87	W	22	no extreme values	0.4	0.2	0	20	3300	2240	3100	-32	somewhat competent
88	W	23	no extreme values	0.5	0.1	0	20	500	330	500	-32	somewhat competent
89	W	22	no extreme values	0.6	-0.1	0	20	600	400	580	-32	somewhat competent
90	W	22	no extreme values	0.25	-0.25	0.05	20	4600	3120	4460	-32	somewhat competent
91	W	24	no extreme values	0.7	0	0	20	800	540	800	-32	somewhat competent
92	W	20	no extreme values	0.5	0.1	0	20	1780	1210	1500	-32	somewhat competent
93	W	26	no extreme values	0.25	-0.1	0	20	2100	1420	2200	-32	somewhat competent
94	W	21	no extreme values	0.25	0.25	0	20	5003	3400	4033	-32	somewhat competent
95	W	25	no extreme values	0.7	0.5	0.1	20	750	500	700	-32	somewhat competent
96	W	25	no extreme values	0.6	0.2	0.1	20	800	540	800	-32	somewhat competent
97	W	25	no extreme values	0.75	0.5	0	20	550	370	500	-32	somewhat competent
98	W	26	no extreme values	0.7	0.1	0.2	20	800	540	800	-32	somewhat competent
99	M	23	no extreme values	0.4	0.02	0	20	600	400	600	-32	somewhat competent
1	M	21	extreme values	0.7	-0.1	0	21	500	660	NA	32	somewhat competent
2	W	22	extreme values	0.8	0.3	0	21	1111	1460	1311	32	somewhat competent
3	W	20	extreme values	0.5	0.2	0.2	21	400	520	400	32	somewhat competent
4	W	26	extreme values	NA	NA	0	21	400	520	400	32	somewhat competent
5	M	27	extreme values	0.15	0.05	0	21	600	790	630	32	somewhat competent
6	W	25	extreme values	0.5	0.1	0	21	2450	3230	3050	32	somewhat competent
7	W	33	extreme values	0.5	0.1	0.1	21	370	480	370	32	somewhat competent
8	W	26	extreme values	0.9	0.2	0	21	1430	1880	1430	32	somewhat competent
9	W	21	extreme values	0.65	0.1	0.35	21	450	590	450	32	somewhat competent
10	W	24	extreme values	0.6	0.2	0	21	450	590	490	32	somewhat competent
11	W	27	extreme values	0.75	0.1	0.35	21	3250	4290	3250	32	somewhat competent
12	W	26	extreme values	0.7	0.1	0	21	1300	1710	1400	32	somewhat competent
13	W	23	extreme values	0.65	0.2	0	21	460	600	480	32	somewhat competent
14	W	27	extreme values	0.6	0.05	0	21	690	910	690	32	somewhat competent
15	W	27	extreme values	0.8	0.2	0.1	21	400	520	425	32	somewhat competent
16	M	21	extreme values	0.65	0.5	0	21	750	990	750	32	somewhat competent
17	W	21	extreme values	0.9	-0.1	0	21	1800	2370	1800	32	somewhat competent
18	M	25	extreme values	0.75	0.2	0	21	900	1180	900	32	somewhat competent
19	W	24	extreme values	0.5	0.25	0.25	21	3250	4290	3250	32	somewhat competent
[truncated: 6,911 more rows]
